# Supplementary material
Source: PubMed Central journal article supplement (PMC7292735)
Supplement: NIHMS1593673-supplement-Full_supplementary_material.pdf [file NIHMS1593673-supplement-Full_supplementary_material.pdf]

## Supplementary Online Content

Patel AP, Wang M, Fahed AC, et al. Association of rare pathogenic DNA variants for familial hypercholesterolemia, hereditary breast and ovarian cancer syndrome, and Lynch syndrome with disease risk in adults according to family history. *JAMA Netw Open*. 2020;3(4):e203959. doi:10.1001/jamanetworkopen.2020.3959

**eMethods.** Study Populations, Gene Sequencing, Variant Quality Control, and Variant Classification

**eTable 1.** Adjustment of Lipid Levels in the UK Biobank Based on Self-report of Lipid-Lowering Medications

**eTable 2.** Variant Characteristics and Evidence in Support of Pathogenic or Likely Pathogenic Classifications

**eTable 3.** Baseline Characteristics of Familial Hypercholesterolemia Variant Carriers and Noncarriers

**eTable 4.** Baseline Characteristics of Women Hereditary Breast and Ovarian Cancer Syndrome Variant Carriers and Noncarriers

**eTable 5.** Baseline Characteristics of Lynch Syndrome Variant Carriers and Noncarriers

**eTable 6.** Familial Hypercholesterolemia, Hazard Ratios for Each Component of the Composite End Point

**eTable 7.** Hereditary Breast and Ovarian Cancer Syndrome, Hazard Ratios for Primary Cancers

**eTable 8.** Lynch Syndrome, Hazard Ratios for Primary Cancers

**eTable 9.** Prevalence and Clinical Importance of Pathogenic or Likely Pathogenic Variants for 3 Genomic Conditions Stratified by Gene

**eFigure 1.** Frequency of Carriers of Pathogenic or Likely Pathogenic Variants, for Each of 3 Genomic Conditions According to Gene

**eFigure 2.** Observed and Estimated Untreated Low-Density Lipoprotein Cholesterol Levels According to Familial Hypercholesterolemia Variant Status

**eFigure 3.** Age-Dependent Cumulative Probability of Disease According to Pathogenic or Likely Pathogenic Variant Carrier Status

**eFigure 4.** Predicted Risk of Disease at Ages 55, 65, and 75 According to Pathogenic or Likely Pathogenic Variant Carrier Status and Family History

**eReferences.**

This supplementary material has been provided by the authors to give readers additional information about their work.

## eMethods.

### *Study populations*

The study population consisted of a subset of the UK biobank consisting of 49,738 participants who underwent exome sequencing at the Regeneron Genetics Center.<sup>1</sup> Extensive clinical data including diagnosis of prevalent and incident atherosclerotic cardiovascular disease and cancers are available on all participants.<sup>2,3</sup> Coronary artery disease was defined based on self-report of “heart attack/myocardial infarction”, hospitalization records confirming a diagnosis of acute myocardial infarction or its acute complications, ischemic heart disease, coronary revascularization procedures (coronary artery bypass graft surgery or percutaneous angioplasty/stent placement), or death register indicating ischemic heart disease or myocardial infarction as a cause of death. Ischemic stroke was defined based on self-report of ischemic stroke, hospitalization records confirming a diagnosis of cerebral infarction due to thrombosis, cerebral atherosclerosis, cerebrovascular syndromes, and cerebrovascular stenoses, or death register indicating ischemic stroke as a cause of death. Breast cancer, ovarian cancer, colorectal cancer, uterine cancer, and cancers of the gastrointestinal tract, genitourinary tract, and skin were each defined based on self-report of the diagnosis, hospitalization records, cancer register data specifying type of cancer, and death register. For each of the three disease groups, the earliest date at which the diagnosis was ascertained was considered as the diagnosis date.

### *Gene sequencing*

Whole-exome sequencing of 49,960 UK Biobank participants was performed at the Regeneron Genetics Center as previously described,<sup>1</sup> and sequencing reads were aligned to the human reference genome build GRCh38 using the Burrows-Wheeler Aligner algorithm.<sup>4</sup> Coverage exceeded 20X at 94.6% of sites on average. Variant calls through two separate pipelines, an “SPB pipeline” that used WeCall (GenomicsPLC) and GLnexus software and a functional equivalence (FE) pipeline that used GATK, were made available by the UK Biobank for 49,960 samples.<sup>1,5,6</sup> Variants from the FE pipeline that were also present in the SPB pipeline were included. 222 samples were excluded, for which there were no genotyping data available (n=51) or that failed additional sample quality control using genotyping data: heterozygous missingness outlier (n=112), putative sex chromosome aneuploidy (n=56) and discordance between reported and genetic sex (n=20). No individuals within the group analyzed withdrew consent at the time of analysis. The remaining variants of 49,738 participants were carried forward for further analysis. PLINK formatted files were converted to VCF and a liftover was performed from GRCh38 to GRCh37.p13 by CrossMap (v0.3.3).<sup>7</sup>

### *Variant quality control*

Analysis was limited to the protein-coding regions and canonical splice sites of 9 genes for any of the three Tier 1 genomic conditions: familial hypercholesterolemia (*LDLR*, *APOB* and *PCSK9*), hereditary breast and ovarian cancer syndrome (*BRCA1* and *BRCA2*), and Lynch syndrome (*MLH1*, *MSH2*, *MSH6* and *PMS2*). Observed variants were filtered to a candidate list of variants that excludes synonymous variants or variants present at allele frequency of  $\geq 0.005$  in any racial subpopulation of the gnomAD Genome Aggregation Database.<sup>8</sup> Additional variant quality control filters excluded variants that fall in low complexity regions, variants that fall in regions with segmental duplications, or variants that do not pass the threshold for the random forest algorithm of gnomAD.<sup>6,8</sup> The final variants were called both by the FE and SPB pipeline.

### *Variant classification*

Candidate variants were filtered to select variants meeting clinical criteria of pathogenicity (pathogenic or likely pathogenic) based on American College of Medical Genetics and Genomics (ACMG)/Association of Molecular Pathology (AMP) criteria,<sup>9</sup> by an American Board of Genetics and Genomics (AMBGG)-certified clinical geneticist, blinded to the phenotype of the participants, at the Partners HealthCare Laboratory of Molecular

Medicine (Boston, MA). In summary, the ACMG/AMP criteria for classifying pathogenic variants look at the effect of the variant on the gene, the previous reports of pathogenicity of the variant, functional studies supporting the damaging effect of the gene, and the prevalence of the variant in cohorts of cases with the disease and controls.<sup>9</sup> Findings of the ClinGen and ClinVar expert panels were all incorporated into interpretation of each variant. Variants with limited available data were independently reviewed by multiple geneticists.<sup>10,11</sup>

**eTable 1.** Adjustment of Lipid Levels in the UK Biobank Based on Self-report of Lipid-Lowering Medications

| Medication            | Lipid Level Adjustment |      |      |      | References |
|-----------------------|------------------------|------|------|------|------------|
|                       | TC                     | LDL  | HDL  | TG   |            |
| Statin                | -20%                   | -30% | NA   | -15% | 12         |
| Ezetimibe             | -15%                   | -20% | NA   | NA   | 13–15      |
| Bile Acid Sequestrant | NA                     | -15% | NA   | NA   | 16         |
| Fibrate               | -10%                   | -10% | +10% | -35% | 17         |
| Niacin                | -10%                   | -10% | +15% | -20% | 17         |
| Not specified*        | -20%                   | -30% | NA   | -15% | 12         |

In participants who are on lipid-lowering medications, lipid levels were adjusted depending on the type of lipid-lowering medication intake based on prior reports of effect size for each medication type from the literature.<sup>12–17</sup> For example, in the case of statin intake, total cholesterol was divided by 0.8, lower density cholesterol by 0.7 and triglycerides by 0.85. \*When the lipid-lowering medication was not specified, it was assumed a statin.

**eTable 2.** Variant Characteristics and Evidence in Support of Pathogenic or Likely Pathogenic Classifications

| Gene<br>Number of Carriers | Variant         | Amino acid or<br>cDNA change      | Comments                                                                                                                                                                                                                                                                                                                                                                                                                                                                                                                                                                                                                                                                                                                                                                                                                                                                                                                                                                                                                                                                                                                                                                                                                                                                                                                                                                                                                                                                                                                                                                                                    |
|----------------------------|-----------------|-----------------------------------|-------------------------------------------------------------------------------------------------------------------------------------------------------------------------------------------------------------------------------------------------------------------------------------------------------------------------------------------------------------------------------------------------------------------------------------------------------------------------------------------------------------------------------------------------------------------------------------------------------------------------------------------------------------------------------------------------------------------------------------------------------------------------------------------------------------------------------------------------------------------------------------------------------------------------------------------------------------------------------------------------------------------------------------------------------------------------------------------------------------------------------------------------------------------------------------------------------------------------------------------------------------------------------------------------------------------------------------------------------------------------------------------------------------------------------------------------------------------------------------------------------------------------------------------------------------------------------------------------------------|
| <i>APOB</i><br>3           | 2:21229161:G>A  | p.Arg3527Trp<br>Pathogenic        | The p.Arg3527Trp variant (also referred to in the literature as p.Arg3500Trp) in <i>APOB</i> has been reported in at least 33 individuals with familial hypercholesterolemia, the majority of whom are of East Asian ancestry, and segregated with disease in at least 15 affected relatives from 4 families (Gaffney 1995, Choong 1997, Tai 1998, Fisher 1999, Tai 2001, Yang 2007, Hollandt 2012, Chiou 2010, Chiou 2011, Chiou 2012, Bertolini 2013). This variant has been reported in ClinVar (Variation ID 40223) and has also been identified in 22/18848 East Asian chromosomes by the Genome Aggregation Database (gnomAD, <a href="http://gnomad.broadinstitute.org">http://gnomad.broadinstitute.org</a> ; dbSNP rs144467873). This frequency is low enough to be consistent with the frequency of familial hypercholesterolemia (FH) in the general population. In vitro functional studies provide some evidence that the p.Arg3527Trp variant may impact protein function (Gaffney 1995, Fisher 1999, Tai 2001). Additionally, another variant at this position, p.Arg3527Gln, is a well-established pathogenic variant for FH. In summary, this variant meets criteria to be classified as pathogenic for FH in an autosomal dominant manner based upon segregation studies, increased prevalence in affected individuals, and pathogenicity of other variants at this position. Please note that pathogenic variants in <i>APOB</i> can have reduced penetrance and a less severe phenotype than disease-causing <i>LDLR</i> or <i>PCSK9</i> variants (Youngblom and Knowles, GeneReviews). |
| <i>APOB</i><br>37          | 2:21229160:C>T  | p.Arg3527Gln<br>Pathogenic        | The p.Arg3527Gln variant in <i>APOB</i> is a well-established pathogenic variant that is mainly found in individuals of European descent. It has been previously reported in >500 individuals with familial hypercholesterolemia (FH) and segregated with disease in >50 affected relatives (Soria 1989, März 1993, Leren 1997, Ludwig 1990, Bednarska-Makaruk 2001, Horvath 2001, Kalina 2001). It has also been reported by other clinical laboratories in ClinVar (Variation ID 17890) and has been identified in 53/126056 of European chromosomes, including 1 homozygote, by the Genome Aggregation Database (gnomAD, <a href="http://gnomad.broadinstitute.org">http://gnomad.broadinstitute.org</a> ; dbSNP rs5742904). This frequency is low enough to be consistent with the frequency of FH in the general population. In summary, this variant meets criteria to be classified as pathogenic for autosomal dominant familial hypercholesterolemia based upon presence in multiple affected individuals and segregation studies. Please note that pathogenic variants in <i>APOB</i> can have reduced penetrance and a less severe phenotype than disease-causing <i>LDLR</i> or <i>PCSK9</i> variants (Youngblom and Knowles, GeneReviews). ACMG/AMP Criteria applied: PS4 Strong; PP1 Strong.                                                                                                                                                                                                                                                                                                  |
| <i>BRCA1</i><br>1          | 17:41201209:G>A | p.Gln1779X<br>Pathogenic          | The p.Gln1779X variant in <i>BRCA1</i> has been reported in 2 siblings with early-onset breast cancer (Levanat 2012). It was absent from large population studies. This variant leads to a premature termination codon at position 1779, which is predicted to lead to a truncated or absent protein. Loss of function of the <i>BRCA1</i> gene is an established disease mechanism in autosomal dominant hereditary breast and ovarian cancer syndrome (HBOC). In vitro functional studies support an impact on protein function (Findlay 2018). This variant was classified as Pathogenic on Oct 18, 2016 by the ClinGen-approved ENIGMA expert panel (Variation ID: 55540). In summary, this variant meets criteria to be classified as pathogenic for autosomal dominant HBOC. ACMG/AMP Criteria applied: PVS1, PM2, PS3 Moderate.                                                                                                                                                                                                                                                                                                                                                                                                                                                                                                                                                                                                                                                                                                                                                                      |
| <i>BRCA1</i><br>1          | 17:41203088:A>C | p.Met1775Arg<br>Pathogenic        | The p.Met1775Arg variant in <i>BRCA1</i> has been reported in >20 individuals with <i>BRCA1</i> -related cancers, with a higher prevalence in those of African descent (Futreal 1994, Pal 2015, Hall 2009, Miki 1994, Fackenthal 2012, BIC database) and has been classified in ClinVar as Pathogenic on Aug 10, 2015 by the ClinGen-approved ENIGMA expert panel (Variation ID: 17694). It has also been identified in 4/24950 African chromosomes by gnomAD ( <a href="http://gnomad.broadinstitute.org">http://gnomad.broadinstitute.org</a> ); however, this frequency is low enough to be consistent with the frequency of hereditary breast and ovarian cancer (HBOC) in the general population. Computational prediction tools and conservation analysis suggest that the p.Met1775Arg variant may impact the protein, though this information is not predictive enough to determine pathogenicity. In vitro functional studies support an impact on protein function (Kawai 2002, Caligo 2009, Lee 2010, Findlay 2018). In summary, this variant meets criteria to be classified as pathogenic for autosomal dominant HBOC. ACMG/AMP Criteria applied: PS3, PS4, PP1_Moderate, PM2 Supporting, PP3.                                                                                                                                                                                                                                                                                                                                                                                                 |
| <i>BRCA1</i><br>1          | 17:41209079:->G | p.Gln1756ProfsX74<br>Pathogenic   | The p.Gln1756ProfsX74 variant in <i>BRCA1</i> (also referred to as p.Gln1777fs) is a founder variant in the Ashkenazi Jewish population and has been reported in >1000 individuals with <i>BRCA1</i> -associated cancers (Abeliovich 1997, Elwad 2011, Breast Cancer Information Core (BIC) database). This variant has also been identified in 24/103702 Ashkenazi Jewish and 25/129200 European chromosomes by the Genome Aggregation Database (gnomAD, <a href="http://gnomad.broadinstitute.org">http://gnomad.broadinstitute.org</a> ; dbSNP rs397507247). This variant is predicted to cause a frameshift, which alters the protein's amino acid sequence beginning at position 1756 and leads to a premature termination codon 74 amino acids downstream. This alteration is then predicted to lead to a truncated or absent protein. Heterozygous loss of function of the <i>BRCA1</i> gene is an established disease mechanism in hereditary breast and ovarian cancer (HBOC). Furthermore, the p.Gln1756fs variant was classified as Pathogenic on April 22, 2016 by the ClinGen-approved ENIGMA expert panel (ClinVar SCV000282341.1). In summary, this variant meets criteria to be classified as pathogenic for HBOC in an autosomal dominant manner based upon the predicted impact to the protein and presence in affected individuals. ACMG/AMP Criteria applied: PS4, PVS1.                                                                                                                                                                                                                |
| <i>BRCA1</i><br>1          | 17:41209139:A>G | p.Val1736Ala<br>Likely Pathogenic | The p.Val1736Ala variant in <i>BRCA1</i> has been identified in at least 5 individuals with <i>BRCA1</i> -associated cancer and segregated with disease in 4 affected relatives, including 1 obligate carrier (Akbari 2011, Domchek 2013, Finch 2016, Thompson 2016). One of the probands with ovarian cancer, short stature, and developmental delay also carried a loss-of-function variant in <i>BRCA1</i> in trans (Domchek 2013). This variant was                                                                                                                                                                                                                                                                                                                                                                                                                                                                                                                                                                                                                                                                                                                                                                                                                                                                                                                                                                                                                                                                                                                                                     |

|              |                  |                                        |                                                                                                                                                                                                                                                                                                                                                                                                                                                                                                                                                                                                                                                                                                                                                                                                                                                                                                                                                                                                                                                                                                                                                                                                                                                                                           |
|--------------|------------------|----------------------------------------|-------------------------------------------------------------------------------------------------------------------------------------------------------------------------------------------------------------------------------------------------------------------------------------------------------------------------------------------------------------------------------------------------------------------------------------------------------------------------------------------------------------------------------------------------------------------------------------------------------------------------------------------------------------------------------------------------------------------------------------------------------------------------------------------------------------------------------------------------------------------------------------------------------------------------------------------------------------------------------------------------------------------------------------------------------------------------------------------------------------------------------------------------------------------------------------------------------------------------------------------------------------------------------------------|
|              |                  |                                        | absent from large population studies but has been reported in ClinVar (Variation ID# 37648). Computational prediction tools and conservation analysis suggest that this variant may impact the protein. In addition, the majority of in vitro functional studies support a loss-of-function impact on protein function (Carvalho 2007, Lee 2010, Rowling 2010, Domchek 2013, Gaboriau 2015, Woods 2016, Findlay 2018). In summary, although additional studies are required to fully establish its clinical significance, this variant meets criteria to be classified as likely pathogenic for autosomal dominant hereditary breast and ovarian cancer. ACMG/AMP Criteria applied: PM2, PS3 Moderate, PP1, PP3, PS4 Supporting.                                                                                                                                                                                                                                                                                                                                                                                                                                                                                                                                                          |
| <i>BRCA1</i> | 17:41215890:C>A  | c.5152+1G>T<br>Pathogenic              | The c.5152+1G>T variant in <i>BRCA1</i> has been reported in at least 11 probands hereditary breast and/or ovarian cancer (HBOC; Gayther 1995, Brovkina 2018, BIC database). It was absent from large population studies. This variant occurs within the canonical splice site (+/- 1,2) and is predicted to cause altered splicing leading to an abnormal or absent protein. Loss of function of the <i>BRCA1</i> gene is an established disease mechanism in autosomal dominant HBOC. In vitro functional studies support an impact on protein function (Findlay 2018). This variant was classified as Pathogenic on Oct 18, 2016 by the ClinGen-approved ENIGMA expert panel (Variation ID: 55423). In summary, this variant meets criteria to be classified as pathogenic for autosomal dominant HBOC. ACMG/AMP Criteria applied: PVS1, PM2, PS3_Moderate, PS4_Moderate.                                                                                                                                                                                                                                                                                                                                                                                                              |
| <i>BRCA1</i> | 17:41215902:A>C  | p.Val1714Gly<br>Likely Pathogenic      | The p.Val1714Gly variant in <i>BRCA1</i> has been reported in at least 3 individuals with hereditary breast and/or ovarian cancer (HBOC) and segregated with disease in 4 affected individuals from one family (Li 2018, Zhang 2015, BIC database). It was absent from large population studies. This variant has also been reported in ClinVar (Variation ID: 55413). Computational prediction tools and conservation analyses suggest that this variant may impact the protein, though this information is not predictive enough to determine pathogenicity. In vitro functional studies provide some evidence that this variant impacts protein function (Lee 2010, Findlay 2018, Woods 2016); however, these types of assays may not accurately represent biological function. In summary, although additional studies are required to fully establish its clinical significance, this variant meets criteria to be classified as likely pathogenic. ACMG/AMP Criteria applied: PM2, PS3_Moderate, PP1, PP3, PS4_Supporting.                                                                                                                                                                                                                                                          |
| <i>BRCA1</i> | 17:41215920:G>T  | p.Ala1708Glu<br>Pathogenic             | The p.Ala1708Glu variant in <i>BRCA1</i> has been reported in more than 40 individuals with hereditary breast and ovarian cancer (HBOC) and segregated with disease in at least 5 affected relatives from 3 families (Futreal 1994, Greenman 1998, Blesa 2000, de la Hoya 2002, Infante 2006, Torres 2007, Laitman 2011, Sagi 2011, Laitman 2012, Rodriguez 2012, de Juan 2013, Hernandez 2014). It has also been identified in 2/34580 Latino chromosomes by the Genome Aggregation Database (gnomAD, <a href="http://gnomad.broadinstitute.org">http://gnomad.broadinstitute.org</a> ); however, this frequency is low enough to be consistent with the frequency of HBOC in the general population. Computational prediction tools and conservation analysis suggest that this variant may impact the protein. In vitro functional studies provide some evidence that the p.Ala1729Glu variant may cause skipping of exon 18 (Millevoi 2010, Sanz 2010). In addition, this variant was classified as Pathogenic on Aug 10, 2015 by the ClinGen-approved ENIGMA Expert Panel (ClinVar SCV000244385.1). In summary, the p.Ala1729Glu variant meets criteria to be classified as pathogenic for autosomal dominant HBOC. ACMG/AMP Criteria applied: PS4, PM2, PS3_Moderate, PP1_Moderate. |
| <i>BRCA1</i> | 17:41226397:AG>- | p.Ser1542TrpfsX31<br>Pathogenic        | The p.Ser1542TrpfsX31 variant in <i>BRCA1</i> has been reported in at least 6 individuals with hereditary breast and/or ovarian cancer (HBOC; Evans 2003, BIC database) and was absent from large population studies. This variant is predicted to cause a frameshift, which alters the protein's amino acid sequence beginning at position 1542 and leads to a premature termination codon 31 amino acids downstream. This alteration is then predicted to lead to a truncated or absent protein. Loss of function of the <i>BRCA1</i> gene is an established disease mechanism in autosomal dominant HBOC. Additionally, this variant was classified as Pathogenic on Sep 8, 2016 by the ClinGen-approved ENIGMA expert panel (Variation ID: 55243). In summary, this variant meets criteria to be classified as pathogenic for autosomal dominant HBOC. ACMG/AMP Criteria applied: PVS1, PM2, PS4_Moderate.                                                                                                                                                                                                                                                                                                                                                                            |
| <i>BRCA1</i> | 17:41226448:TT>- | p.Gln1525ArgfsX5<br>Pathogenic         | The p.Gln1525ArgfsX5 variant in <i>BRCA1</i> has been reported in at least 15 individuals with hereditary breast and/or ovarian cancer (HBOC; Greenman 1998, Ellis 2000, Al-Mulla 2009, Song 2014, Robertson 2012, BIC database) and was absent from large population studies. This variant is predicted to cause a frameshift, which alters the protein's amino acid sequence beginning at position 1525 and leads to a premature termination codon 5 amino acids downstream. This alteration is then predicted to lead to a truncated or absent protein. Loss of function of the <i>BRCA1</i> gene is an established disease mechanism in autosomal dominant HBOC. Additionally, this variant was classified as Pathogenic on Apr 22, 2016 by the ClinGen-approved ENIGMA expert panel (Variation ID: 55229). In summary, this variant meets criteria to be classified as pathogenic for autosomal dominant HBOC. ACMG/AMP Criteria applied: PVS1, PM2, PS4.                                                                                                                                                                                                                                                                                                                            |
| <i>BRCA1</i> | 17:41226499:C>T  | p.Trp1508X<br>Pathogenic               | The p.Trp1508X variant in <i>BRCA1</i> has been reported in >13 individuals with <i>BRCA1</i> -related cancers (Loman 2001, Laitman 2011, Walsh 2011, Bayraktar 2012, Lowery 2018, BIC database). It was absent from large population studies. This nonsense variant leads to a premature termination codon at position 1508, which is predicted to lead to a truncated or absent protein. Loss of function of the <i>BRCA1</i> gene is an established disease mechanism in autosomal dominant hereditary breast and ovarian cancer syndrome (HBOC). Additionally, this variant was classified as Pathogenic on Sept 8, 2016 by the ClinGen-approved ENIGMA expert panel (Variation ID: 55221). In summary, this variant meets criteria to be classified as pathogenic for autosomal dominant HBOC. ACMG/AMP Criteria applied: PVS1, PM2, PS4_Moderate.                                                                                                                                                                                                                                                                                                                                                                                                                                   |
| <i>BRCA1</i> | 17:41228590:G>-  | p.Gln1467ArgfsX38<br>Likely Pathogenic | The p.Gln1467ArgfsX38 variant in <i>BRCA1</i> has not been previously reported in individuals with hereditary breast and/or ovarian cancer (HBOC) and was absent from large population studies. This variant is predicted to cause a frameshift, which alters the protein's amino acid sequence beginning at position 1467 and leads to a premature termination codon 38 amino acids downstream. This alteration is then predicted to lead to a truncated or absent protein. Loss of function of the <i>BRCA1</i> gene is an established disease mechanism in autosomal dominant HBOC. In summary, although additional studies are required to fully establish its clinical significance, this variant meets criteria to be classified as likely pathogenic for autosomal dominant HBOC. ACMG/AMP Criteria applied: PVS1, PM2.                                                                                                                                                                                                                                                                                                                                                                                                                                                            |
| <i>BRCA1</i> | 17:41234451:G>A  | p.Arg1443X<br>Pathogenic               | The p.Arg1443X variant in <i>BRCA1</i> has been previously reported in >100 individuals with <i>BRCA1</i> -associated cancers (Vézina 2005, Hall 2009). It has also been identified in 3/35428 Latino chromosomes by the Genome Aggregation Database (gnomAD, <a href="http://gnomad.broadinstitute.org">http://gnomad.broadinstitute.org</a> ). This nonsense variant leads to a premature termination codon at position 1443, which is predicted to lead to a truncated or absent protein. In                                                                                                                                                                                                                                                                                                                                                                                                                                                                                                                                                                                                                                                                                                                                                                                           |

|                   |                  |                                       |                                                                                                                                                                                                                                                                                                                                                                                                                                                                                                                                                                                                                                                                                                                                                                                                                                                                                                                                                                                                                                                                                                                                                                                                                               |
|-------------------|------------------|---------------------------------------|-------------------------------------------------------------------------------------------------------------------------------------------------------------------------------------------------------------------------------------------------------------------------------------------------------------------------------------------------------------------------------------------------------------------------------------------------------------------------------------------------------------------------------------------------------------------------------------------------------------------------------------------------------------------------------------------------------------------------------------------------------------------------------------------------------------------------------------------------------------------------------------------------------------------------------------------------------------------------------------------------------------------------------------------------------------------------------------------------------------------------------------------------------------------------------------------------------------------------------|
|                   |                  |                                       | addition, functional studies provide some evidence that this variant results in a truncated protein (Caligo 2009). Heterozygous loss of function of the <i>BRCA1</i> gene is an established disease mechanism in individuals with hereditary breast and ovarian cancer (HBOC). In addition, this variant was classified as Pathogenic on April 22, 2016 by the ClinGen-approved ENIGMA expert panel (ClinVar SCV000282327.1). In summary, this variant meets our criteria to be classified as pathogenic for HBOC in an autosomal dominant manner. ACMG/AMP Criteria applied: PVS1, PS3 Supporting, PS4.                                                                                                                                                                                                                                                                                                                                                                                                                                                                                                                                                                                                                      |
| <i>BRCA1</i><br>1 | 17:41243788:->A  | p.Lys1254X<br>Pathogenic              | The p.Lys1254X variant (resulting from c.3759dupT) in <i>BRCA1</i> has been reported in >20 individuals with breast or ovarian cancer (Greenman 1998, van Orsouw 1999, de Juan Jimenez 2013, Alvarez 2017, BIC database). It was absent from large population studies. This frameshift variant leads to a premature termination codon at position 1254, which is predicted to lead to a truncated or absent protein. Loss of function of the <i>BRCA1</i> gene is an established disease mechanism in autosomal dominant hereditary breast and ovarian cancer syndrome (HBOC). Additionally, this variant was classified as Pathogenic on Sept 8, 2016 by the ClinGen-approved ENIGMA expert panel (Variation ID: 54992). In summary, this variant meets criteria to be classified as pathogenic for autosomal dominant HBOC. ACMG/AMP Criteria applied: PVS1, PM2, PS4.                                                                                                                                                                                                                                                                                                                                                      |
| <i>BRCA1</i><br>1 | 17:41243920:->T  | p.Glu1210ArgfsX9<br>Pathogenic        | The p.Glu1210ArgfsX9 variant in <i>BRCA1</i> has been reported in >10 individuals with breast and/or ovarian cancer (HBOC; Kim 2006, George 2013, Hirasawa 2017, Li 2018, BIC database). It has also been identified in 2/18370 East Asian chromosomes by gnomAD ( <a href="http://gnomad.broadinstitute.org">http://gnomad.broadinstitute.org</a> ); however, this frequency is low enough to be consistent with the frequency of hereditary breast and ovarian cancer in the general population. This variant is predicted to cause a frameshift, which alters the protein's amino acid sequence beginning at position 1210 and leads to a premature termination codon 9 amino acids downstream. This alteration is then predicted to lead to a truncated or absent protein. Loss of function of the <i>BRCA1</i> gene is an established disease mechanism in autosomal dominant hereditary breast and ovarian cancer syndrome. Additionally, this variant was classified as Pathogenic on Apr 22, 2016 by the ClinGen-approved ENIGMA expert panel (Variation ID: 37534). In summary, this variant meets criteria to be classified as pathogenic for autosomal dominant HBOC. ACMG/AMP Criteria applied: PVS1, PM2, PS4 M. |
| <i>BRCA1</i><br>1 | 17:41243941:G>A  | p.Arg1203X<br>Pathogenic              | The p.Arg1203X variant in <i>BRCA1</i> has been reported in >40 individuals with <i>BRCA1</i> -associated cancers (Friedman 1994, Manguoglu 2003, Walsh 2011, Solano 2012, Kim 2012, Juwle 2012, Couch 2015, Breast Cancer Information Core (BIC) database, Sharing Clinical Reports Project). This variant has been identified in 1/17194 East Asian and 2/111402 European chromosomes by the Genome Aggregation Database (gnomAD, <a href="http://gnomad.broadinstitute.org">http://gnomad.broadinstitute.org</a> ; dbSNP rs62625308). This nonsense variant leads to a premature termination codon at position 1203, which is predicted to lead to a truncated or absent protein. Heterozygous loss of function of the <i>BRCA1</i> gene is an established disease mechanism in individuals with hereditary breast and ovarian cancer (HBOC). In addition, this variant was classified as Pathogenic on April 22, 2016 by the ClinGen-approved ENIGMA expert panel (ClinVar SCV000282311.1). In summary, this variant meets criteria to be classified as pathogenic for HBOC in an autosomal dominant manner. ACMG/AMP Criteria applied: PVS1, PM2, PS4.                                                                   |
| <i>BRCA1</i><br>1 | 17:41244633:C>-  | p.Gly972AspfsX28<br>Likely Pathogenic | The p.Gly972AspfsX28 variant in <i>BRCA1</i> has not been previously reported in individuals with hereditary breast and/or ovarian cancer (HBOC) and was absent from large population studies, but has been reported in ClinVar (Variation ID: 54716). This variant is predicted to cause a frameshift, which alters the protein's amino acid sequence beginning at position 972 and leads to a premature termination codon 28 amino acids downstream. This alteration is then predicted to lead to a truncated or absent protein. Loss of function of the <i>BRCA1</i> gene is an established disease mechanism in autosomal dominant HBOC. In summary, although additional studies are required to fully establish its clinical significance, this variant meets criteria to be classified as likely pathogenic for autosomal dominant HBOC. ACMG/AMP Criteria applied: PVS1, PM2.                                                                                                                                                                                                                                                                                                                                          |
| <i>BRCA1</i><br>1 | 17:41244866:TT>- | p.Lys894ThrfsX8<br>Pathogenic         | The p.Lys894ThrfsX8 variant in <i>BRCA1</i> has been reported in >80 individuals with <i>BRCA1</i> -associated cancers (Friedman 1994, Walsh 2011, Wong-Brown 2016, Zhang 2011, Liede 2000, Breast Cancer Information Core (BIC) database), segregated with disease in >10 affected relatives, and was absent from large population studies. This variant is predicted to cause a frameshift, which alters the protein's amino acid sequence beginning at position 894 and leads to a premature termination codon 8 amino acids downstream. This alteration is then predicted to lead to a truncated or absent protein. Heterozygous loss of function of the <i>BRCA1</i> gene is an established disease mechanism in individuals with hereditary breast and ovarian cancer (HBOC). In addition, this variant was classified as Pathogenic on April 22, 2016 by the ClinGen-approved ENIGMA expert panel (ClinVar SCV000282287.1). In summary, the p.Lys894fs variant meets our criteria to be classified as pathogenic for HBOC in an autosomal dominant manner based upon the predicted impact to the protein. ACMG/AMP Criteria applied: PVS1, PS4, PP1 Strong, PM2.                                                       |
| <i>BRCA1</i><br>1 | 17:41244922:C>A  | p.Gly876X<br>Likely Pathogenic        | The p.Gly876X variant in <i>BRCA1</i> has not been previously reported in individuals with hereditary breast and/or ovarian cancer (HBOC) and was absent from large population studies. This nonsense variant leads to a premature termination codon at position 876, which is predicted to lead to a truncated or absent protein. Loss of function of the <i>BRCA1</i> gene is an established disease mechanism in autosomal dominant HBOC. In summary, although additional studies are required to fully establish its clinical significance, this variant meets criteria to be classified as likely pathogenic for autosomal dominant HBOC. ACMG/AMP Criteria applied: PVS1, PM2.                                                                                                                                                                                                                                                                                                                                                                                                                                                                                                                                          |
| <i>BRCA1</i><br>1 | 17:41245285:C>-  | p.Glu755LysfsX10<br>Likely Pathogenic | The p.Glu755LysfsX10 variant in <i>BRCA1</i> has not been previously reported in individuals with hereditary breast and/or ovarian cancer (HBOC) and was absent from large population studies, but has been reported in ClinVar (Variation ID: 54517). This variant is predicted to cause a frameshift, which alters the protein's amino acid sequence beginning at position 755 and leads to a premature termination codon 10 amino acids downstream. This alteration is then predicted to lead to a truncated or absent protein. Loss of function of the <i>BRCA1</i> gene is an established disease mechanism in autosomal dominant HBOC. In summary, although additional studies are required to fully establish its clinical significance, this variant meets criteria to be classified as likely pathogenic for autosomal dominant HBOC. ACMG/AMP Criteria applied: PVS1, PM2.                                                                                                                                                                                                                                                                                                                                          |

|                   |                    |                                       |                                                                                                                                                                                                                                                                                                                                                                                                                                                                                                                                                                                                                                                                                                                                                                                                                                                                                                                                                                                                                                                                                                                                                                                                                                                                                                                                                                                                                                                                   |
|-------------------|--------------------|---------------------------------------|-------------------------------------------------------------------------------------------------------------------------------------------------------------------------------------------------------------------------------------------------------------------------------------------------------------------------------------------------------------------------------------------------------------------------------------------------------------------------------------------------------------------------------------------------------------------------------------------------------------------------------------------------------------------------------------------------------------------------------------------------------------------------------------------------------------------------------------------------------------------------------------------------------------------------------------------------------------------------------------------------------------------------------------------------------------------------------------------------------------------------------------------------------------------------------------------------------------------------------------------------------------------------------------------------------------------------------------------------------------------------------------------------------------------------------------------------------------------|
| <i>BRCA1</i><br>1 | 17:41245354:C>A    | p.Glu732X<br>Pathogenic               | The p.Glu732X variant in <i>BRCA1</i> has been reported in at least 6 individuals with a personal or family history of breast and/or ovarian cancer (Kadouri 2004, BIC database). It was absent from large population studies. This variant leads to a premature termination codon at position 732, which is predicted to lead to a truncated or absent protein. Loss of function of the <i>BRCA1</i> gene is an established disease mechanism in autosomal dominant hereditary breast and ovarian cancer syndrome (HBOC). Additionally, this variant was classified as Pathogenic on Sep 8, 2016 by the ClinGen-approved ENIGMA expert panel (Variation ID: 54492). In summary, this variant meets criteria to be classified as pathogenic for autosomal dominant HBOC. ACMG/AMP Criteria applied: PVS1, PM2, PS4 Moderate.                                                                                                                                                                                                                                                                                                                                                                                                                                                                                                                                                                                                                                      |
| <i>BRCA1</i><br>1 | 17:41245670:->ACTA | p.Val627SerfsX4<br>Pathogenic         | The p.Val627SerfsX4 variant in <i>BRCA1</i> has been reported in at least 17 individuals with hereditary breast and/or ovarian cancer (HBOC; Kwong 2014, Balz 2002, Thomassen 2008, BIC database) and was absent from large population studies. This variant is predicted to cause a frameshift, which alters the protein's amino acid sequence beginning at position 627 and leads to a premature termination codon 4 amino acids downstream. This alteration is then predicted to lead to a truncated or absent protein. Loss of function of the <i>BRCA1</i> gene is an established disease mechanism in autosomal dominant HBOC. Additionally, this variant was classified as Pathogenic on Sep 8, 2016 by the ClinGen-approved ENIGMA expert panel (Variation ID: 54376). In summary, this variant meets criteria to be classified as pathogenic for autosomal dominant HBOC. ACMG/AMP Criteria applied: PVS1, PM2, PS4.                                                                                                                                                                                                                                                                                                                                                                                                                                                                                                                                     |
| <i>BRCA1</i><br>1 | 17:41245861:G>A    | p.Gln563X<br>Pathogenic               | The p.Gln563X variant in <i>BRCA1</i> (also referred to as 1806C>T) has been reported in >100 individuals with <i>BRCA1</i> -associated cancers (Shattuck-Eidens 1995, Wagner 1998, Pohlreich 2003, Foretova 2004, Salazar 2006, Krajc 2008, Janav 2010, Zuradelli 2010, Blay 2013, Cunningham 2014, Kluska 2015, Cini 2016, Breast Cancer Information Core (BIC) database). It was also identified in 5/66568 European chromosomes by the Exome Aggregation Consortium (ExAC, <a href="http://exac.broadinstitute.org">http://exac.broadinstitute.org</a> ; dbSNP rs80356898); however, this frequency is low enough to be consistent with the frequency of hereditary breast and ovarian cancer (HBOC) in the general population. This nonsense variant leads to a premature termination codon at position 563, which is predicted to lead to a truncated or absent protein. Heterozygous loss of function of the <i>BRCA1</i> gene is an established disease mechanism in HBOC. Furthermore, this variant was classified as Pathogenic on April 22, 2016 by the ClinGen-approved ENIGMA expert panel (ClinVar SCV000282262.1). In summary, this variant meets criteria to be classified as pathogenic for HBOC in an autosomal dominant manner. PVS1, PM2, PS4.                                                                                                                                                                                                |
| <i>BRCA1</i><br>1 | 17:41246077:G>A    | p.Gln491X<br>Pathogenic               | The p.Gln491X variant in <i>BRCA1</i> has been reported in at least 6 individuals with a personal or family history of breast and/or ovarian cancer (HBOC; Rashid 2006, Park 2017, Sun 2017, BIC database). It was absent from large population studies. This variant leads to a premature termination codon at position 491, which is predicted to lead to a truncated or absent protein. Loss of function of the <i>BRCA1</i> gene is an established disease mechanism in autosomal dominant hereditary breast and ovarian cancer syndrome (HBOC). Additionally, this variant was classified as Pathogenic on Apr 22, 2016 by the ClinGen-approved ENIGMA expert panel (Variation ID: 54264). In summary, this variant meets criteria to be classified as pathogenic for autosomal dominant HBOC. ACMG/AMP Criteria applied: PVS1, PM2, PS4 Moderate.                                                                                                                                                                                                                                                                                                                                                                                                                                                                                                                                                                                                           |
| <i>BRCA1</i><br>1 | 17:41246192:T>-    | p.Glu453ArgfsX22<br>Likely Pathogenic | The p.Glu453ArgfsX22 variant in <i>BRCA1</i> has not been previously reported in individuals with hereditary breast and/or ovarian cancer (HBOC) and was absent from large population studies, but has been reported in ClinVar (Variation ID: 125495). This variant is predicted to cause a frameshift, which alters the protein's amino acid sequence beginning at position 453 and leads to a premature termination codon 22 amino acids downstream. This alteration is then predicted to lead to a truncated or absent protein. Loss of function of the <i>BRCA1</i> gene is an established disease mechanism in autosomal dominant HBOC. In summary, although additional studies are required to fully establish its clinical significance, this variant meets criteria to be classified as likely pathogenic for autosomal dominant HBOC. ACMG/AMP Criteria applied: PVS1, PM2.                                                                                                                                                                                                                                                                                                                                                                                                                                                                                                                                                                             |
| <i>BRCA1</i><br>1 | 17:41246846:TG>-   | p.Thr234LysfsX3<br>Likely Pathogenic  | The p.Thr234LysfsX3 variant in <i>BRCA1</i> has not been previously reported in individuals with hereditary breast and/or ovarian cancer (HBOC) and was absent from large population studies. This variant is predicted to cause a frameshift, which alters the protein's amino acid sequence beginning at position 234 and leads to a premature termination codon 3 amino acids downstream. This alteration is then predicted to lead to a truncated or absent protein. Loss of function of the <i>BRCA1</i> gene is an established disease mechanism in autosomal dominant HBOC. In summary, although additional studies are required to fully establish its clinical significance, this variant meets criteria to be classified as likely pathogenic for autosomal dominant HBOC. ACMG/AMP Criteria applied: PVS1, PM2.                                                                                                                                                                                                                                                                                                                                                                                                                                                                                                                                                                                                                                        |
| <i>BRCA1</i><br>1 | 17:41247869:T>A    | p.Lys222X<br>Likely Pathogenic        | The p.Lys222X variant in <i>BRCA1</i> has not been previously reported in individuals with hereditary breast and/or ovarian cancer (HBOC) and was absent from large population studies. This nonsense variant leads to a premature termination codon at position 222, which is predicted to lead to a truncated or absent protein. Loss of function of the <i>BRCA1</i> gene is an established disease mechanism in autosomal dominant HBOC. In summary, although additional studies are required to fully establish its clinical significance, this variant meets criteria to be classified as likely pathogenic for autosomal dominant HBOC. ACMG/AMP Criteria applied: PVS1, PM2.                                                                                                                                                                                                                                                                                                                                                                                                                                                                                                                                                                                                                                                                                                                                                                              |
| <i>BRCA1</i><br>1 | 17:41256280:T>-    | c.302-2delA<br>Pathogenic             | The c.302-2delA variant in <i>BRCA1</i> has been reported in at least 16 individuals with breast and/or ovarian cancer (Shattuck-Eidens 1997, Gayther 1999, Southey 2003, Chen 2006, Borg 2010, BIC database [ <a href="https://research.nhgri.nih.gov/bic/">https://research.nhgri.nih.gov/bic/</a> ]) and segregated with disease in at least 9 affected relatives from 1 family (Southey 2003). This variant has also been reported by other clinical laboratories in ClinVar (Variation ID# 54753) and was absent from large population databases. The c.302-2delA variant occurs in the invariant region (+/- 1,2) of the splice consensus sequence and is predicted to cause altered splicing leading to an abnormal or absent protein. In vitro studies as well as sequencing of cDNA from individuals with this variant showed that it leads to activation of a cryptic splice site, leading to 10 bp frameshift at the beginning of the next exon and resulting in the addition of 14 new amino acid residues and a premature stop codon (Chen 2006). In summary, this variant meets criteria to be classified as pathogenic for hereditary breast and ovarian cancer (HBOC) in an autosomal dominant manner based upon presence in multiple affected individuals, segregation studies, absence from the general population, functional evidence, and predicted impact on the protein. ACMG/AMP Criteria applied (Richards 2015): PVS1, PS4, PP1 Strong. |



|                   |                        |                                   |                                                                                                                                                                                                                                                                                                                                                                                                                                                                                                                                                                                                                                                                                                                                                                                                                                                                                                                                                                                                                                                                                                                                                                                                                                                                                                                                                                                                                                                                                                                                              |
|-------------------|------------------------|-----------------------------------|----------------------------------------------------------------------------------------------------------------------------------------------------------------------------------------------------------------------------------------------------------------------------------------------------------------------------------------------------------------------------------------------------------------------------------------------------------------------------------------------------------------------------------------------------------------------------------------------------------------------------------------------------------------------------------------------------------------------------------------------------------------------------------------------------------------------------------------------------------------------------------------------------------------------------------------------------------------------------------------------------------------------------------------------------------------------------------------------------------------------------------------------------------------------------------------------------------------------------------------------------------------------------------------------------------------------------------------------------------------------------------------------------------------------------------------------------------------------------------------------------------------------------------------------|
| <i>BRCA1</i><br>2 | 17:41215348:A>-        | c.5193+2delT<br>Pathogenic        | The c.5193+2delT variant in <i>BRCA1</i> has been reported in at least 7 families with hereditary breast and/or ovarian cancer (HBOC) and segregated with disease in at least 3 affected individuals from 1 family (Wagner 1999, Claes 2003, Gayther 1995, BIC database). It was absent from large population studies. This variant has also been reported in ClinVar (Variation ID: 55450). This variant occurs within the canonical splice site (+/- 1,2) and is predicted to cause altered splicing leading to an abnormal or absent protein. In vitro functional studies on patient cells show that this variant leads to exon 19 skipping, leading to a premature stop codon (Houdayer 2012, Claes 2003). This is expected to lead to a truncated or absent protein and loss of function of the <i>BRCA1</i> gene is an established disease mechanism in autosomal dominant HBOC. In summary, this variant meets criteria to be classified as pathogenic for autosomal dominant HBOC. ACMG/AMP Criteria applied: PVS1, PM2, PS3_Moderate, PS4_Moderate, PP1.                                                                                                                                                                                                                                                                                                                                                                                                                                                                            |
| <i>BRCA1</i><br>2 | 17:41215948:G>A        | p.Arg1699Trp<br>Pathogenic        | The p.Arg1699Trp variant in <i>BRCA1</i> is an established pathogenic variant that has been identified in multiple individuals of various ethnic backgrounds with <i>BRCA1</i> -associated cancer and segregated with disease in multiple families (Vallon-Christersson 2001, Rhiem 2007, Kuusisto 2011, Zhang 2011, Spurdle 2012, Larqui 2013, Song 2014, Zahra 2016, Alemar 2017, Barrios 2017, Hirasawa 2017, Alhuqail 2018, Rebbeck 2018, Bhaskaran 2019, Concolino 2019). It was also identified as a de novo change in 1 individual with early onset breast cancer (paternity confirmed; Antonucci 2017) and in the compound heterozygous state with a loss-of-function <i>BRCA1</i> variant in an individual with breast cancer, short stature, intellectual disability, and multiple congenital anomalies (Sawyer 2015). Multiple in vitro analyses as well as multifactorial probability models are consistent with pathogenicity (Carvalho 2007, Easton 2007, Lee 2010, Coquelle 2011, Spurdle 2012, Bouwman 2013). This variant is present in 6/251242 chromosomes by gnomAD ( <a href="https://gnomad.broadinstitute.org">https://gnomad.broadinstitute.org</a> ) and was classified as pathogenic in ClinVar by several laboratories and the ClinGen-approved ENIGMA expert panel (Variation ID 55396). In summary, this variant meets criteria to be classified as pathogenic for autosomal dominant hereditary breast and ovarian cancer. ACMG/AMP Criteria applied: PS2, PS4, PP1_Strong, PM2_Supporting, PS3_Moderate, PP3. |
| <i>BRCA1</i><br>2 | 17:41243789:AGA<br>C>- | p.Ser1253ArgfsX10<br>Pathogenic   | The p.Ser1253ArgfsX10 variant in <i>BRCA1</i> has been reported in >100 individuals with breast and/or ovarian cancer (HBOC; George 2013, Ghiorzo 2012, Meindl 2002, Pohlreich 2005, Sun 2017, Susswein 2015, Zhang 2011, Breast Cancer Information Core (BIC); <a href="https://research.nhgri.nih.gov/bic/">https://research.nhgri.nih.gov/bic/</a> ). This variant has also been identified in 0.004% (5/113572) of European chromosomes by gnomAD ( <a href="http://gnomad.broadinstitute.org">http://gnomad.broadinstitute.org</a> ). This variant is predicted to cause a frameshift, which alters the protein's amino acid sequence beginning at position 1253 and leads to a premature termination codon 10 amino acids downstream. This alteration is then predicted to lead to a truncated or absent protein. Heterozygous loss of function of the <i>BRCA1</i> gene is an established disease mechanism in individuals with HBOC. Moreover, this variant was classified as pathogenic on April 22, 2016 by the ClinGen-approved ENIGMA expert panel (ClinVar SCV000282317.1). In summary, this variant meets criteria to be classified as pathogenic for HBOC in an autosomal dominant manner based upon predicted impact to the protein, presence in multiple affected individuals and low frequency in the general population. ACMG/AMP Criteria applied: PVS1, PM2, PS4.                                                                                                                                                       |
| <i>BRCA1</i><br>2 | 17:41244148:C>A        | p.Glu1134X<br>Pathogenic          | The p.Glu1134X variant in <i>BRCA1</i> has been reported in >20 individuals with <i>BRCA1</i> -associated cancers (Wagner 1999, Bergthorsson 2001, Nedelcu 2002, Pal 2005, Couch 2015, Rebbeck 2016, Breast Cancer Information Core (BIC) database: <a href="https://research.nhgri.nih.gov/bic/">https://research.nhgri.nih.gov/bic/</a> ) and was absent from large population studies. This nonsense variant leads to a premature termination codon at position 1134, which is predicted to lead to a truncated or absent protein. Heterozygous loss of function of the <i>BRCA1</i> gene is an established disease mechanism in individuals with hereditary breast and ovarian cancer (HBOC). In addition, this variant was classified as Pathogenic on April 22, 2016 by the ClinGen-approved ENIGMA expert panel (ClinVar SCV000282306.1). In summary, this variant meets criteria to be classified as pathogenic for HBOC in an autosomal dominant manner based upon presence in multiple affected individuals, absence in the general population and predicted impact to the protein. ACMG/AMP Criteria applied: PVS1; PS4; PM2 (Richards 2015).                                                                                                                                                                                                                                                                                                                                                                                     |
| <i>BRCA1</i><br>2 | 17:41256884:C>A        | c.301+1G>T<br>Likely Pathogenic   | The c.301+1G>T variant in <i>BRCA1</i> has not been previously reported in individuals with hereditary breast and/or ovarian cancer (HBOC) but has been identified in 1/113556 European chromosomes by gnomAD ( <a href="http://gnomad.broadinstitute.org">http://gnomad.broadinstitute.org</a> ); however, this frequency is low enough to be consistent with the frequency of hereditary breast and ovarian cancer (HBOC) in the general population. This variant has also been reported in ClinVar (Variation ID: 246510). This variant occurs within the canonical splice site (+/- 1,2) and is predicted to cause altered splicing leading to an abnormal or absent protein. In vitro functional studies support an impact on protein function (Findlay 2018). Loss of function of the <i>BRCA1</i> gene is an established disease mechanism in autosomal dominant HBOC. In summary, although additional studies are required to fully establish its clinical significance, this variant meets criteria to be classified as likely pathogenic for autosomal dominant HBOC ACMG/AMP Criteria applied: PVS1, PM2                                                                                                                                                                                                                                                                                                                                                                                                                          |
| <i>BRCA1</i><br>3 | 17:41197784:G>A        | p.Arg1835X<br>Pathogenic          | The p.Arg1835X variant in <i>BRCA1</i> has been identified in >50 individuals with <i>BRCA1</i> -associated cancers (Breast Cancer Information Core (BIC) database). This variant has been identified in 2/30616 South Asian chromosomes by the Genome Aggregation Database (GnomAD, <a href="http://gnomad.broadinstitute.org">http://gnomad.broadinstitute.org</a> ); however, this frequency is low enough to be consistent with the frequency of hereditary breast and ovarian cancer (HBOC) in the general population. This nonsense variant leads to a premature termination codon at position 1835. This alteration occurs within the last exon and is more likely to escape nonsense mediated decay (NMD), resulting in a truncated protein. However, in vitro functional studies provide some evidence that this truncation may impact protein function (Ye 2001). Furthermore, this variant was classified as Pathogenic on Apr 22, 2016 by the ClinGen-approved ENIGMA Expert Panel (ClinVar SCV000282345.1). In summary, this variant meets criteria to be classified as pathogenic for autosomal dominant hereditary breast and ovarian cancer (HBOC) based upon its frequency in affected individuals and absence from controls. ACMG/AMP Criteria applied: PVS1_Strong, PS4, PS3_Supporting, PM2.                                                                                                                                                                                                                             |
| <i>BRCA1</i><br>3 | 17:41215947:C>T        | p.Arg1699Gln<br>Likely Pathogenic | The p.Arg1699Gln variant in <i>BRCA1</i> has been reported in >60 individuals with <i>BRCA1</i> -associated cancers and segregated with disease in multiple relatives from 30 families (Spurdle 2012, Shimelis 2017, Moghadasi 2018). This variant has been described as having reduced penetrance compared to other disease-causing variants: up to 24% risk of <i>BRCA1</i> -related cancer by age 70 (95% CI, 10% to 40%) for                                                                                                                                                                                                                                                                                                                                                                                                                                                                                                                                                                                                                                                                                                                                                                                                                                                                                                                                                                                                                                                                                                             |

|                   |                        |                                  |                                                                                                                                                                                                                                                                                                                                                                                                                                                                                                                                                                                                                                                                                                                                                                                                                                                                                                                                                                                                                                                                                                                                                                                                                                                                                                                                                                                             |
|-------------------|------------------------|----------------------------------|---------------------------------------------------------------------------------------------------------------------------------------------------------------------------------------------------------------------------------------------------------------------------------------------------------------------------------------------------------------------------------------------------------------------------------------------------------------------------------------------------------------------------------------------------------------------------------------------------------------------------------------------------------------------------------------------------------------------------------------------------------------------------------------------------------------------------------------------------------------------------------------------------------------------------------------------------------------------------------------------------------------------------------------------------------------------------------------------------------------------------------------------------------------------------------------------------------------------------------------------------------------------------------------------------------------------------------------------------------------------------------------------|
|                   |                        |                                  | Arg1699Gln carriers vs. 58% (95% CI, 7% to 72%) for Arg1699Trp carriers vs. 4.6% risk for women in the general population (Spurdle 2012, Moghadasi 2018). It has been identified in 6/113618 European chromosomes by the Genome Aggregation Database (gnomAD, <a href="http://gnomad.broadinstitute.org">http://gnomad.broadinstitute.org</a> ). While some studies have demonstrated impaired in vitro protein activity, others report that the variant performed similar to wild-type (Williams 2003, Lovelock 2007, Chang 2011). Computational prediction tools and conservation analysis suggest that this variant may impact the protein. In summary, this variant meets criteria to be classified as a low-penetrant pathogenic variant for autosomal dominant HBOC. ACMG/AMP criteria applied: PS4, PP1 Strong, PM5, PM2 Supporting, PP3, PS3 Supporting.                                                                                                                                                                                                                                                                                                                                                                                                                                                                                                                            |
| <i>BRCA1</i><br>3 | 17:41256884:C>G        | c.301+1G>C<br>Likely Pathogenic  | The c.301+1G>C variant in <i>BRCA1</i> has not been previously reported in individuals with hereditary breast and/or ovarian cancer (HBOC) but has been identified in 1/113556 European chromosomes by gnomAD ( <a href="http://gnomad.broadinstitute.org">http://gnomad.broadinstitute.org</a> ); however, this frequency is low enough to be consistent with the frequency of hereditary breast and ovarian cancer (HBOC) in the general population. This variant has also been reported in ClinVar (Variation ID: 267517). This variant occurs within the canonical splice site (+/- 1,2) and is predicted to cause altered splicing leading to an abnormal or absent protein. In vitro functional studies support an impact on protein function (Findlay 2018). Loss of function of the <i>BRCA1</i> gene is an established disease mechanism in autosomal dominant HBOC. In summary, although additional studies are required to fully establish its clinical significance, this variant meets criteria to be classified as likely pathogenic for autosomal dominant HBOC ACMG/AMP Criteria applied: PVS1, PM2.                                                                                                                                                                                                                                                                        |
| <i>BRCA1</i><br>4 | 17:41245073:G>-        | p.Asp825GlufsX21<br>Pathogenic   | The p.Asp825GlufsX21 variant in <i>BRCA1</i> has been reported in >25 individuals with <i>BRCA1</i> -related cancers and has been reported as a founder variant in Scandinavian populations (Pennington 2013, Cunningham 2014, Maxwell 2017, Hakansson 1997, BIC database). It has also been identified in 1/113380 European chromosomes by gnomAD ( <a href="http://gnomad.broadinstitute.org">http://gnomad.broadinstitute.org</a> ); however, this frequency is low enough to be consistent with the frequency of hereditary breast and ovarian cancer (HBOC) in the general population. This variant is predicted to cause a frameshift, which alters the protein's amino acid sequence beginning at position 825 and leads to a premature termination codon 21 amino acids downstream. This alteration is then predicted to lead to a truncated or absent protein. Loss of function of the <i>BRCA1</i> gene is an established disease mechanism in autosomal dominant hereditary breast and ovarian cancer syndrome. Additionally, this variant was classified as Pathogenic on Apr 22, 2016 by the ClinGen-approved ENIGMA expert panel (Variation ID: 37472). In summary, this variant meets criteria to be classified as pathogenic for autosomal dominant HBOC. ACMG/AMP Criteria applied: PVS1, PM2, PS4.                                                                        |
| <i>BRCA1</i><br>4 | 17:41256153:C>A        | p.Glu143X<br>Pathogenic          | The p.Glu143X variant in <i>BRCA1</i> has been reported in >15 individuals with <i>BRCA1</i> -related cancers (Shattuck-Eidens 1997, Caligo 2009, Cunningham 2014, Susswein 2016, Lowery 2018, Yurgelun 2019, BIC database). It was absent from large population studies. This frameshift variant leads to a premature termination codon at position 143, which is predicted to lead to a truncated or absent protein. Loss of function of the <i>BRCA1</i> gene is an established disease mechanism in autosomal dominant hereditary breast and ovarian cancer syndrome (HBOC). Additionally, this variant was classified as Pathogenic on Apr 22, 2016 by the ClinGen-approved ENIGMA expert panel (Variation ID: 37581). In summary, this variant meets criteria to be classified as pathogenic for autosomal dominant HBOC. ACMG/AMP Criteria applied: PVS1, PM2, PS4.                                                                                                                                                                                                                                                                                                                                                                                                                                                                                                                  |
| <i>BRCA1</i><br>5 | 17:41243480:TTG<br>A>- | p.Asn1355LysfsX10<br>Pathogenic  | The p.Asn1355LysfsX10 variant in <i>BRCA1</i> has been reported in at least 17 individuals with hereditary breast and ovarian cancer syndrome (Friedman 1994, Zhang 2011, George 2013, Cao 2013, Cunningham 2014, Leongamornlert 2014, Rashid 2016, Sun 2017, Maxwell 2017, Hirasawa 2017, Li 2018, Singh 2018, Wen 2018, Li 2019) and in 1 individual with prostate cancer (Leongamornlert 2014). It has also been identified in 0.003% (1/30478) of South Asian chromosomes by gnomAD ( <a href="http://gnomad.broadinstitute.org">http://gnomad.broadinstitute.org</a> ). This variant was classified as Pathogenic on April 22, 2016 by the ClinGen-approved Evidence-based Network for the Interpretation of Germline Mutant Alleles (ENIGMA) expert panel (Variation ID 17674). This variant is predicted to cause a frameshift, which alters the protein's amino acid sequence beginning at position 1355 and leads to a premature termination codon 10 amino acids downstream. This alteration is then predicted to lead to a truncated or absent protein. Loss of function of the <i>BRCA1</i> gene is an established disease mechanism in autosomal dominant hereditary breast and ovarian cancer. In summary, this variant meets criteria to be classified as pathogenic for autosomal dominant hereditary breast and ovarian cancer. ACMG/AMP Criteria applied: PVS1, PS4, PM2. |
| <i>BRCA2</i><br>1 | 13:32893317:C>G        | p.Tyr57X<br>Pathogenic           | The p.Tyr57X variant in <i>BRCA2</i> has been reported in the literature in several individuals with unspecified phenotype (van der Hout 2006, Heramb 2018, Rebbeck 2018). It has also been reported in individuals with hereditary breast and/or ovarian cancer (HBOC) in ClinVar (Variation ID: 51179). Furthermore, this variant was classified as Pathogenic by the ClinGen-approved ENIGMA expert panel (SCV000607880.2). It was absent from large population studies. This nonsense variant leads to a premature termination codon at position 57, which is predicted to lead to a truncated or absent protein. Loss of function of the <i>BRCA2</i> gene is an established disease mechanism in autosomal dominant HBOC. In summary, this variant meets criteria to be classified as pathogenic for autosomal dominant HBOC. ACMG/AMP Criteria applied: PVS1, PM2, PS4 Supporting.                                                                                                                                                                                                                                                                                                                                                                                                                                                                                                   |
| <i>BRCA2</i><br>1 | 13:32900420:G>T        | c.516+1G>T<br>Pathogenic         | The c.516+1G>T variant in <i>BRCA2</i> has been reported in the literature in at least 1 individual with ovarian cancer (Weren 2017), and has also been reported in individuals with hereditary breast and ovarian cancer (HBOC) in ClinVar (Variation ID: 267649). It was absent from large population studies. This variant occurs within the canonical splice site (+/- 1,2) and is predicted to cause altered splicing leading to an abnormal or absent protein. Furthermore, in vitro functional studies support that this variant leads to abnormal splicing (Whiley 2011). In summary, this variant meets criteria to be classified as pathogenic for autosomal dominant HBOC. ACMG/AMP Criteria applied: PVS1, PM2, PS3 Supporting.                                                                                                                                                                                                                                                                                                                                                                                                                                                                                                                                                                                                                                                 |
| <i>BRCA2</i><br>1 | 13:32900691:A>G        | p.Asp191Gly<br>Likely Pathogenic | The p.Asp191Gly variant in <i>BRCA2</i> has been reported in 2 individuals with early-onset breast cancer (Gaildrat 2012). It was absent from large population studies. Computational prediction tools and conservation analysis suggest that the p.Asp191Gly variant may impact the protein, though this information is not predictive enough to determine pathogenicity. Additionally, in vitro splicing assays provide evidence that this variant leads to a splicing change, resulting in the in-frame deletion of 20 amino acids (Gaildrat 2012, Fraile-Bethencourt 2019); however, these                                                                                                                                                                                                                                                                                                                                                                                                                                                                                                                                                                                                                                                                                                                                                                                              |

|                   |                        |                                      |                                                                                                                                                                                                                                                                                                                                                                                                                                                                                                                                                                                                                                                                                                                                                                                                                                                                                                                                                                                                                                                                                                                                                                                                                                                                                                                                                                                |
|-------------------|------------------------|--------------------------------------|--------------------------------------------------------------------------------------------------------------------------------------------------------------------------------------------------------------------------------------------------------------------------------------------------------------------------------------------------------------------------------------------------------------------------------------------------------------------------------------------------------------------------------------------------------------------------------------------------------------------------------------------------------------------------------------------------------------------------------------------------------------------------------------------------------------------------------------------------------------------------------------------------------------------------------------------------------------------------------------------------------------------------------------------------------------------------------------------------------------------------------------------------------------------------------------------------------------------------------------------------------------------------------------------------------------------------------------------------------------------------------|
|                   |                        |                                      | types of assays may not accurately represent biological function. In summary, although additional studies are required to fully establish its clinical significance, this variant meets criteria to be classified as likely pathogenic for autosomal dominant hereditary breast and ovarian cancer syndrome (HBOC). ACMG/AMP Criteria applied: PM2, PS3 Moderate, PP3, PS4 Supporting.                                                                                                                                                                                                                                                                                                                                                                                                                                                                                                                                                                                                                                                                                                                                                                                                                                                                                                                                                                                         |
| <i>BRCA2</i><br>1 | 13:32905124:GAC<br>A>- | p.Asp252ValfsX24<br>Pathogenic       | The p.Asp252ValfsX24 variant in <i>BRCA2</i> has been reported in >60 individuals with <i>BRCA2</i> -related cancers and segregated with disease in at least 10 affected members of one family (Tavitigian 1996, Schrader 2016, Park 2017a, Park 2017b, Wang 2018, BIC database). Additionally, it was classified as Pathogenic on Apr. 22, 2016 by the ClinGen-approved ENIGMA expert panel (ClinVar Variation ID: 38103). This variant has also been identified in 0.005% (1/18384) of East Asian chromosomes by gnomAD ( <a href="http://gnomad.broadinstitute.org">http://gnomad.broadinstitute.org</a> ); however, this frequency is low enough to be consistent with the frequency of hereditary breast and ovarian cancer (HBOC) in the general population. This variant is predicted to cause a frameshift, which alters the protein's amino acid sequence beginning at position 252 and leads to a premature termination codon 24 amino acids downstream. This alteration is then predicted to lead to a truncated or absent protein. Loss of function of the <i>BRCA2</i> gene is an established disease mechanism in autosomal dominant hereditary breast and ovarian cancer syndrome (HBOC). In summary, this variant meets criteria to be classified as pathogenic for autosomal dominant HBOC. ACMG/AMP Criteria applied: PVS1, PS4, PP1_Strong, PM2 Supporting. |
| <i>BRCA2</i><br>1 | 13:32906872:T>-        | p.Cys419TrpfsX11<br>Pathogenic       | The p.Cys419TrpfsX11 variant in <i>BRCA2</i> has been reported in at least 8 individuals with a personal or family history of breast or ovarian cancer (Lecarpentier 2012, Wong-Brown 2015, Lubinski 2004, BIC database). Additionally, it was classified as Pathogenic on Sep. 8, 2016 by the ClinGen-approved ENIGMA expert panel (ClinVar Variation ID: 37733). This variant was absent from large population studies. The p.Cys419TrpfsX11 variant is predicted to cause a frameshift, which alters the protein's amino acid sequence beginning at position 419 and leads to a premature termination codon 11 amino acids downstream. This alteration is then predicted to lead to a truncated or absent protein. Loss of function of the <i>BRCA2</i> gene is an established disease mechanism in autosomal dominant hereditary breast and ovarian cancer syndrome (HBOC). In summary, this variant meets criteria to be classified as pathogenic for autosomal dominant HBOC. ACMG/AMP Criteria applied: PVS1, PM2, PS4 Moderate.                                                                                                                                                                                                                                                                                                                                        |
| <i>BRCA2</i><br>1 | 13:32906916:AAA<br>G>- | p.Lys437IlefsX22<br>Pathogenic       | The p.Lys437IlefsX22 variant in <i>BRCA2</i> has been reported in >30 individuals with <i>BRCA2</i> -related cancers (Gayther 1997, Caputo 2012, Laarabi 2017, BIC database). Additionally, it was classified as Pathogenic on Apr. 22, 2016 by the ClinGen-approved ENIGMA expert panel (ClinVar Variation ID: 37737). This variant has also been identified in 0.006% (1/15544) of African chromosomes by gnomAD ( <a href="http://gnomad.broadinstitute.org">http://gnomad.broadinstitute.org</a> ); however, this frequency is low enough to be consistent with the frequency of hereditary breast and ovarian cancer (HBOC) in the general population. The p.Lys437IlefsX22 variant is predicted to cause a frameshift, which alters the protein's amino acid sequence beginning at position 437 and leads to a premature termination codon 22 amino acids downstream. This alteration is then predicted to lead to a truncated or absent protein. Loss of function of the <i>BRCA2</i> gene is an established disease mechanism in HBOC. In summary, this variant meets criteria to be classified as pathogenic for autosomal dominant HBOC. ACMG/AMP Criteria applied: PVS1, PM2, PS4.                                                                                                                                                                                  |
| <i>BRCA2</i><br>1 | 13:32906974:A>-        | p.Lys454AsnfsX6<br>Likely Pathogenic | The p.Lys454AsnfsX6 variant in <i>BRCA2</i> has been reported in 1 individual with breast cancer (Fackenthal 2012). Additionally, it was classified as Pathogenic on Oct. 18, 2016 by the ClinGen-approved ENIGMA expert panel (Variation ID: 51109). This variant was absent from large population studies. The p.Lys454AsnfsX6 variant is predicted to cause a frameshift, which alters the protein's amino acid sequence beginning at position 454 and leads to a premature termination codon 6 amino acids downstream. This alteration is then predicted to lead to a truncated or absent protein. Loss of function of the <i>BRCA2</i> gene is an established disease mechanism in autosomal dominant hereditary breast and ovarian cancer syndrome (HBOC). In summary, although additional studies are required to fully establish its clinical significance, this variant meets criteria to be classified as likely pathogenic for autosomal dominant HBOC. ACMG/AMP Criteria applied: PVS1, PM2.                                                                                                                                                                                                                                                                                                                                                                       |
| <i>BRCA2</i><br>1 | 13:32907419:G>T        | p.Gly602X<br>Likely Pathogenic       | The p.Gly602X variant in <i>BRCA2</i> has not been previously reported in individuals with hereditary breast and/or ovarian cancer (HBOC) and was absent from large population studies. This nonsense variant leads to a premature termination codon at position 602, which is predicted to lead to a truncated or absent protein. Loss of function of the <i>BRCA2</i> gene is an established disease mechanism in autosomal dominant HBOC. In summary, although additional studies are required to fully establish its clinical significance, this variant meets criteria to be classified as likely pathogenic for autosomal dominant HBOC. ACMG/AMP Criteria applied: PVS1, PM2.                                                                                                                                                                                                                                                                                                                                                                                                                                                                                                                                                                                                                                                                                           |
| <i>BRCA2</i><br>1 | 13:32907455:->T        | p.Asn615X<br>Pathogenic              | The p.Asn615X (c.1842dupT) variant in <i>BRCA2</i> has been reported in at least 3 individuals with <i>BRCA2</i> -related cancers (Esteban Cardenaosa 2010, BIC database). Additionally, it was classified as Pathogenic on Apr 22, 2016 by the ClinGen-approved ENIGMA expert panel (ClinVar Variation ID: 51212). This variant was absent from large population studies. The p.Asn615X (c.1842dupT) variant is an insertion of a single nucleotide, creating a premature termination codon at position 57, which is predicted to lead to a truncated or absent protein. Loss of function of the <i>BRCA2</i> gene is an established disease mechanism in autosomal dominant hereditary breast and ovarian cancer syndrome (HBOC). In summary, this variant meets criteria to be classified as pathogenic for autosomal dominant HBOC. ACMG/AMP Criteria applied: PVS1, PM2, PS4 Supporting.                                                                                                                                                                                                                                                                                                                                                                                                                                                                                  |
| <i>BRCA2</i><br>1 | 13:32910421:G>-        | p.Arg645GlufsX15<br>Pathogenic       | The p.Arg645GlufsX15 variant in <i>BRCA2</i> has been reported in >50 individuals with <i>BRCA2</i> -associated cancers (Evans, 2004, Janavicius 2010, Breast Cancer Information Core (BIC) database). This variant was absent from large population studies, though the ability of these studies to accurately detect indels may be limited. This variant is predicted to cause a frameshift, which alters the protein's amino acid sequence beginning at position 645 and leads to a premature termination codon 15 amino acids downstream. This alteration is then predicted to lead to a truncated or absent protein. Heterozygous loss of function of the <i>BRCA2</i> gene is an established disease mechanism for hereditary breast and ovarian cancer (HBOC). In summary, this variant meets our criteria to be classified as pathogenic for HBOC in an autosomal dominant manner based upon the predicted impact to the protein. ACMG/AMP criteria applied: PVS1, PS4, PM2.                                                                                                                                                                                                                                                                                                                                                                                           |
| <i>BRCA2</i><br>1 | 13:32910821:->A        | p.Asp777GlufsX11<br>Pathogenic       | The p.Asp777GlufsX11 variant in <i>BRCA2</i> has been reported in >15 individuals with <i>BRCA2</i> -related cancers (Agoff 2002, Edwards 2003, Lowery 2018, Castro 2013, Alsop 2012, Oros 2006, BIC database). It has also been identified in 1/113388 European chromosomes by gnomAD                                                                                                                                                                                                                                                                                                                                                                                                                                                                                                                                                                                                                                                                                                                                                                                                                                                                                                                                                                                                                                                                                         |

|                   |                        |                                       |                                                                                                                                                                                                                                                                                                                                                                                                                                                                                                                                                                                                                                                                                                                                                                                                                                                                                                                                                                                                                                                                                                                                                                                                                                                                                                                                                                                                          |
|-------------------|------------------------|---------------------------------------|----------------------------------------------------------------------------------------------------------------------------------------------------------------------------------------------------------------------------------------------------------------------------------------------------------------------------------------------------------------------------------------------------------------------------------------------------------------------------------------------------------------------------------------------------------------------------------------------------------------------------------------------------------------------------------------------------------------------------------------------------------------------------------------------------------------------------------------------------------------------------------------------------------------------------------------------------------------------------------------------------------------------------------------------------------------------------------------------------------------------------------------------------------------------------------------------------------------------------------------------------------------------------------------------------------------------------------------------------------------------------------------------------------|
|                   |                        |                                       | ( <a href="http://gnomad.broadinstitute.org">http://gnomad.broadinstitute.org</a> ); however, this frequency is low enough to be consistent with the frequency of hereditary breast and ovarian cancer (HBOC) in the general population. This variant is predicted to cause a frameshift, which alters the protein's amino acid sequence beginning at position 777 and leads to a premature termination codon 11 amino acids downstream. This alteration is then predicted to lead to a truncated or absent protein. Loss of function of the <i>BRCA2</i> gene is an established disease mechanism in autosomal dominant hereditary breast and ovarian cancer syndrome (HBOC). Additionally, this variant was classified as Pathogenic on Sept 8 2016 by the ClinGen-approved ENIGMA expert panel (Variation ID: 91775). In summary, this variant meets criteria to be classified as pathogenic for autosomal dominant HBOC. ACMG/AMP Criteria applied: PVS1, PM2, PS4.                                                                                                                                                                                                                                                                                                                                                                                                                                  |
| <i>BRCA2</i><br>1 | 13:32910899:->A        | p.Tyr803X<br>Pathogenic               | The p.Tyr803X (c.2408_2409insA) variant in <i>BRCA2</i> has not been reported in individuals with <i>BRCA2</i> -related cancers. It was absent from large population studies. This variant is a deletion of a single nucleotide, creating a premature termination codon at position 803, which is predicted to lead to a truncated or absent protein. Loss of function of the <i>BRCA2</i> gene is an established disease mechanism in autosomal dominant hereditary breast and ovarian cancer (HBOC). Furthermore, a different variant resulting in a termination codon at the same position (c.2409T>G, p.Tyr803X) has been classified as Pathogenic by our laboratory and multiple submitters in ClinVar, including the ClinGen-approved ENIGMA expert panel (ClinVar Variation ID 37784). In summary, the p.Tyr803X (c.2408_2409insA) variant meets criteria to be classified as pathogenic for autosomal dominant HBOC. ACMG/AMP Criteria applied: PVS1, PS1, PM2.                                                                                                                                                                                                                                                                                                                                                                                                                                  |
| <i>BRCA2</i><br>1 | 13:32910901:T>G        | p.Tyr803X<br>Pathogenic               | The p.Tyr803X variant in <i>BRCA2</i> has been reported in at least 2 individuals with <i>BRCA2</i> -associated cancers (Breast Cancer Information Core (BIC) database, Zhang 2011) and was absent from large population studies. This nonsense variant leads to a premature termination codon at position 803, which is predicted to lead to a truncated or absent protein. Heterozygous loss of function of the <i>BRCA2</i> gene is an established disease mechanism in hereditary breast and ovarian cancer (HBOC). In addition, this variant was classified as Pathogenic on September 8, 2016 by the ClinGen-approved ENIGMA expert panel (ClinVar SCV000300516.2). In summary, this variant meets our criteria to be classified as pathogenic for HBOC in an autosomal dominant manner based upon the predicted impact to the protein. ACMG/AMP Criteria applied: PVS1, PM2, PS4 Supporting.                                                                                                                                                                                                                                                                                                                                                                                                                                                                                                      |
| <i>BRCA2</i><br>1 | 13:32911098:C>G        | p.Ser869X<br>Likely Pathogenic        | The p.Ser869X variant in <i>BRCA2</i> has not been previously reported in individuals with hereditary breast and/or ovarian cancer (HBOC) and was absent from large population studies, but has been reported in ClinVar (Variation ID: 252823). This nonsense variant leads to a premature termination codon at position 869, which is predicted to lead to a truncated or absent protein. Loss of function of the <i>BRCA2</i> gene is an established disease mechanism in autosomal dominant HBOC. In summary, although additional studies are required to fully establish its clinical significance, this variant meets criteria to be classified as likely pathogenic for autosomal dominant HBOC. ACMG/AMP Criteria applied: PVS1, PM2.                                                                                                                                                                                                                                                                                                                                                                                                                                                                                                                                                                                                                                                            |
| <i>BRCA2</i><br>1 | 13:32911298:AAA<br>C>- | p.Ala938ProfsX21<br>Pathogenic        | The p.Ala938ProfsX21 variant in <i>BRCA2</i> is a well-established pathogenic variant for hereditary breast and ovarian cancer (HBOC) and is one of the most common germline mutations in non-Ashkenazi Jewish individuals with breast cancer (Gao 2000, Diez 2003, Janavicius 2010, Caputo 2012, Kwong 2012, Infante 2013). This variant has also been identified in one male with prostate cancer and 5 males with breast cancer (Edwards 2010, de Juan 2015). Furthermore, this variant was identified in 2/113374 of European chromosomes by gnomAD ( <a href="http://gnomad.broadinstitute.org">http://gnomad.broadinstitute.org</a> ). This variant was classified as Pathogenic on April 22, 2016 by the ClinGen-approved Evidence-based Network for the Interpretation of Germline Mutant Alleles (ENIGMA) expert panel (Variation ID 9322). The p.Ala938ProfsX21 variant is predicted to cause a frameshift, which alters the protein's amino acid sequence beginning at position 938 and leads to a premature termination codon 21 amino acids downstream. This alteration is then predicted to lead to a truncated or absent protein. Heterozygous loss of function of the <i>BRCA2</i> gene is an established disease mechanism for HBOC. In summary, this variant meets our criteria to be classified as pathogenic for autosomal dominant HBOC. ACMG/AMP Criteria applied: PVS1, PS4, PM2. |
| <i>BRCA2</i><br>1 | 13:32911322:A>T        | p.Lys944X<br>Pathogenic               | The p.Lys944X variant in <i>BRCA2</i> has been reported in at least 11 individuals with <i>BRCA2</i> -related cancers; however two of these individuals harbored pathogenic variants in <i>BRCA1</i> as well (Hakansson 1997, Heidemann 2012, Vietri 2013, Susswein 2016, Weren 2017, Lowery 2018, Wen 2018, BIC database). In addition, this variant was reported in one proband with Fanconi anemia who was compound heterozygous for this variant and a second variant in <i>BRCA2</i> (Bodd 2010). The p.Lys944X variant has also been identified in 0.004% (1/24868) of African chromosomes by gnomAD ( <a href="http://gnomad.broadinstitute.org">http://gnomad.broadinstitute.org</a> ); however, this frequency is low enough to be consistent with the frequency of hereditary breast and ovarian cancer (HBOC) in the general population. This nonsense variant is predicted to lead to a premature termination codon at position 944. Loss of function of the <i>BRCA2</i> gene is an established disease mechanism in autosomal dominant HBOC. Additionally, this variant was classified as Pathogenic on Sep 8, 2016 by the ClinGen-approved ENIGMA expert panel (Variation ID: 51355). In summary, this variant meets criteria to be classified as pathogenic for autosomal dominant HBOC. ACMG/AMP Criteria applied: PVS1, PS4_Moderate, PP1.                                             |
| <i>BRCA2</i><br>1 | 13:32911322:AA><br>-   | p.Lys945ArgfsX13<br>Likely Pathogenic | The p.Lys945ArgfsX13 variant in <i>BRCA2</i> has not been previously reported in individuals with hereditary breast and/or ovarian cancer (HBOC) and was absent from large population studies, but has been reported in ClinVar (Variation ID: 55791). This variant is predicted to cause a frameshift, which alters the protein's amino acid sequence beginning at position 945 and leads to a premature termination codon 13 amino acids downstream. This alteration is then predicted to lead to a truncated or absent protein. Loss of function of the <i>BRCA2</i> gene is an established disease mechanism in autosomal dominant HBOC. In summary, although additional studies are required to fully establish its clinical significance, this variant meets criteria to be classified as likely pathogenic for autosomal dominant HBOC. ACMG/AMP Criteria applied: PVS1, PM2.                                                                                                                                                                                                                                                                                                                                                                                                                                                                                                                     |
| <i>BRCA2</i><br>1 | 13:32911595:G>T        | p.Glu1035X<br>Pathogenic              | The p.Glu1035X variant in <i>BRCA2</i> has been reported in at least 8 individuals with <i>BRCA2</i> -related cancers (Ramus 2007, Tung 2015, Meric-Bernstam 2016, Susswein 2016, BIC database). It has also been identified in 1/112890 European chromosomes by gnomAD ( <a href="http://gnomad.broadinstitute.org">http://gnomad.broadinstitute.org</a> ); however, this frequency is low enough to be consistent with the frequency of hereditary breast and ovarian                                                                                                                                                                                                                                                                                                                                                                                                                                                                                                                                                                                                                                                                                                                                                                                                                                                                                                                                  |

|                   |                        |                                        |                                                                                                                                                                                                                                                                                                                                                                                                                                                                                                                                                                                                                                                                                                                                                                                                                                                                                                                                                                                                                                                                                                                                                                                                                                                                                                                                  |
|-------------------|------------------------|----------------------------------------|----------------------------------------------------------------------------------------------------------------------------------------------------------------------------------------------------------------------------------------------------------------------------------------------------------------------------------------------------------------------------------------------------------------------------------------------------------------------------------------------------------------------------------------------------------------------------------------------------------------------------------------------------------------------------------------------------------------------------------------------------------------------------------------------------------------------------------------------------------------------------------------------------------------------------------------------------------------------------------------------------------------------------------------------------------------------------------------------------------------------------------------------------------------------------------------------------------------------------------------------------------------------------------------------------------------------------------|
|                   |                        |                                        | cancer (HBOC) in the general population. This variant leads to a premature termination codon at position 1035, which is predicted to lead to a truncated or absent protein. Loss of function of the <i>BRCA2</i> gene is an established disease mechanism in autosomal dominant hereditary breast and ovarian cancer syndrome (HBOC). Additionally, this variant was classified as Pathogenic on Apr 22, 2016 by the ClinGen-approved ENIGMA expert panel (Variation ID: 51400). In summary, this variant meets criteria to be classified as pathogenic for autosomal dominant HBOC. ACMG/AMP Criteria applied: PVS1, PM2, PS4 Moderate.                                                                                                                                                                                                                                                                                                                                                                                                                                                                                                                                                                                                                                                                                         |
| <i>BRCA2</i><br>1 | 13:32912207:A>-        | p.Lys1239AsnfsX2<br>0<br>Pathogenic    | The p.Lys1239AsnfsX2 variant in <i>BRCA2</i> (also referred to in the literature as c.3745delA) has been reported in at least 10 individuals with breast cancer and segregated with disease in at least 15 affected individuals from 2 families (Tchou 2007, Tai 2007, BIC database). It was absent from large population studies. This variant is predicted to cause a frameshift, which alters the protein's amino acid sequence beginning at position 1239 and leads to a premature termination codon 20 amino acids downstream. This alteration is then predicted to lead to a truncated or absent protein. Loss of function of the <i>BRCA2</i> gene is an established disease mechanism in autosomal dominant hereditary breast and ovarian cancer syndrome (HBOC). Additionally, this variant was classified as Pathogenic on Sept 8 2016 by the ClinGen-approved ENIGMA expert panel (Variation ID: 37855). In summary, this variant meets criteria to be classified as pathogenic for autosomal dominant HBOC. ACMG/AMP Criteria applied: PVS1, PP1 Strong, PM2.                                                                                                                                                                                                                                                        |
| <i>BRCA2</i><br>1 | 13:32912277:C>G        | p.Ser1262X<br>Pathogenic               | The p.Ser1262X variant in <i>BRCA2</i> has been reported in at least 6 individuals with <i>BRCA2</i> -related cancers (Song 2014, de Juan Jimenez 2013, Loughrey 2008, BIC database). It has also been identified in 1/110430 European chromosomes by gnomAD ( <a href="http://gnomad.broadinstitute.org">http://gnomad.broadinstitute.org</a> ); however, this frequency is low enough to be consistent with the frequency of hereditary breast and ovarian cancer (HBOC) in the general population. This variant leads to a premature termination codon at position 1262, which is predicted to lead to a truncated or absent protein. Loss of function of the <i>BRCA2</i> gene is an established disease mechanism in autosomal dominant hereditary breast and ovarian cancer syndrome (HBOC). Additionally, this variant was classified as Pathogenic on Apr 22, 2016 by the ClinGen-approved ENIGMA expert panel (Variation ID: 51525). In summary, this variant meets criteria to be classified as pathogenic for autosomal dominant HBOC. ACMG/AMP Criteria applied: PVS1, PM2, PS4 Moderate.                                                                                                                                                                                                                            |
| <i>BRCA2</i><br>1 | 13:32912364:A>-        | p.Gln1291HisfsX2<br>Pathogenic         | The p.Gln1291HisfsX2 variant in <i>BRCA2</i> (also referred to in the literature as c.4101delA) has been reported in at least 3 individuals with <i>BRCA2</i> -related cancers (Young 2018, Song 2014, Foley 2015). It was absent from large population studies. This variant is predicted to cause a frameshift, which alters the protein's amino acid sequence beginning at position 1291 and leads to a premature termination codon 2 amino acids downstream. This alteration is then predicted to lead to a truncated or absent protein. Loss of function of the <i>BRCA2</i> gene is an established disease mechanism in autosomal dominant hereditary breast and ovarian cancer syndrome (HBOC). Additionally, this variant was classified as Pathogenic on Sept 8 2016 by the ClinGen-approved ENIGMA expert panel (Variation ID: 91809). In summary, this variant meets criteria to be classified as pathogenic for autosomal dominant HBOC. ACMG/AMP Criteria applied: PVS1, PM2, PS4 Supporting.                                                                                                                                                                                                                                                                                                                       |
| <i>BRCA2</i><br>1 | 13:32912655:C>-        | p.Thr1388IlefsX22<br>Likely Pathogenic | The p.Thr1388IlefsX22 variant in <i>BRCA2</i> has not been previously reported in individuals with hereditary breast and/or ovarian cancer (HBOC) and was absent from large population studies. This variant is predicted to cause a frameshift, which alters the protein's amino acid sequence beginning at position 1388 and leads to a premature termination codon 22 amino acids downstream. This alteration is then predicted to lead to a truncated or absent protein. Loss of function of the <i>BRCA2</i> gene is an established disease mechanism in autosomal dominant HBOC. In summary, although additional studies are required to fully establish its clinical significance, this variant meets criteria to be classified as likely pathogenic for autosomal dominant HBOC. ACMG/AMP Criteria applied: PVS1, PM2.                                                                                                                                                                                                                                                                                                                                                                                                                                                                                                   |
| <i>BRCA2</i><br>1 | 13:32912956:C>-        | p.His1488GlnfsX4<br>Likely Pathogenic  | The p.His1488GlnfsX4 variant in <i>BRCA2</i> has not been previously reported in individuals with hereditary breast and/or ovarian cancer (HBOC) and was absent from large population studies. This variant is predicted to cause a frameshift, which alters the protein's amino acid sequence beginning at position 1488 and leads to a premature termination codon 4 amino acids downstream. This alteration is then predicted to lead to a truncated or absent protein. Loss of function of the <i>BRCA2</i> gene is an established disease mechanism in autosomal dominant HBOC. In summary, although additional studies are required to fully establish its clinical significance, this variant meets criteria to be classified as likely pathogenic for autosomal dominant HBOC. ACMG/AMP Criteria applied: PVS1, PM2.                                                                                                                                                                                                                                                                                                                                                                                                                                                                                                     |
| <i>BRCA2</i><br>1 | 13:32913119:A>-        | p.Asn1544ThrfsX2<br>4<br>Pathogenic    | The p.Asn1544ThrfsX24 variant in <i>BRCA2</i> (also referred to in the literature as c.4859delA) is a founder variant in the Phillipines and has been reported in >20 individuals with <i>BRCA2</i> -related cancers (Hopper 1999, Zhang 2011, De Leon Matsuda 2002, BIC database). It has also been identified in 1/34418 Latino chromosomes by gnomAD ( <a href="http://gnomad.broadinstitute.org">http://gnomad.broadinstitute.org</a> ); however, this frequency is low enough to be consistent with the frequency of hereditary breast and ovarian cancer (HBOC) in the general population. This variant is predicted to cause a frameshift, which alters the protein's amino acid sequence beginning at position 1544 and leads to a premature termination codon 24 amino acids downstream. This alteration is then predicted to lead to a truncated or absent protein. Loss of function of the <i>BRCA2</i> gene is an established disease mechanism in autosomal dominant hereditary breast and ovarian cancer syndrome (HBOC). Additionally, this variant was classified as Pathogenic on Sept 8 2016 by the ClinGen-approved ENIGMA expert panel (Variation ID: 37913). In summary, this variant meets criteria to be classified as pathogenic for autosomal dominant HBOC. ACMG/AMP Criteria applied: PVS1, PM2, PS4. |
| <i>BRCA2</i><br>1 | 13:32913206:->GCAAAGAC | p.Ala1572GlyfsX10<br>Likely Pathogenic | The p.Ala1572GlyfsX10 variant in <i>BRCA2</i> has not been previously reported in individuals with hereditary breast and/or ovarian cancer (HBOC) and was absent from large population studies. This variant is predicted to cause a frameshift, which alters the protein's amino acid sequence beginning at position 1572 and leads to a premature termination codon 10 amino acids downstream. This alteration is then predicted to lead to a truncated or absent protein. Loss of function of the <i>BRCA2</i> gene is an established disease mechanism in autosomal dominant HBOC. In summary, although additional studies are required to fully establish its clinical significance, this variant meets criteria to be classified as likely pathogenic for autosomal dominant HBOC. ACMG/AMP Criteria applied: PVS1, PM2.                                                                                                                                                                                                                                                                                                                                                                                                                                                                                                   |
| <i>BRCA2</i><br>1 | 13:32913209:TG>-       | p.Cys1573X<br>Likely Pathogenic        | The p.Cys1573X variant in <i>BRCA2</i> has not been previously reported in individuals with hereditary breast and/or ovarian cancer (HBOC) and was absent from large population studies. This nonsense variant leads to a premature termination codon at position 1573, which is predicted to                                                                                                                                                                                                                                                                                                                                                                                                                                                                                                                                                                                                                                                                                                                                                                                                                                                                                                                                                                                                                                    |

|                   |                        |                                            |                                                                                                                                                                                                                                                                                                                                                                                                                                                                                                                                                                                                                                                                                                                                                                                                                                                                                                                                                                                                                                                                                                                                                                                                               |
|-------------------|------------------------|--------------------------------------------|---------------------------------------------------------------------------------------------------------------------------------------------------------------------------------------------------------------------------------------------------------------------------------------------------------------------------------------------------------------------------------------------------------------------------------------------------------------------------------------------------------------------------------------------------------------------------------------------------------------------------------------------------------------------------------------------------------------------------------------------------------------------------------------------------------------------------------------------------------------------------------------------------------------------------------------------------------------------------------------------------------------------------------------------------------------------------------------------------------------------------------------------------------------------------------------------------------------|
|                   |                        |                                            | lead to a truncated or absent protein. Loss of function of the <i>BRCA2</i> gene is an established disease mechanism in autosomal dominant HBOC. In summary, although additional studies are required to fully establish its clinical significance, this variant meets criteria to be classified as likely pathogenic for autosomal dominant HBOC. ACMG/AMP Criteria applied: PVS1, PM2.                                                                                                                                                                                                                                                                                                                                                                                                                                                                                                                                                                                                                                                                                                                                                                                                                      |
| <i>BRCA2</i><br>1 | 13:32913221:G>T        | p.Glu1577X<br>Pathogenic                   | The p.Glu1577X variant in <i>BRCA2</i> has been reported in two individuals with breast cancer (Couch 2015, Copson 2018). It was absent from large population studies. This nonsense variant leads to a premature termination codon at position 1577, which is predicted to lead to a truncated or absent protein. Loss of function of the <i>BRCA2</i> gene is an established disease mechanism in autosomal dominant hereditary breast and ovarian cancer syndrome (HBOC). In summary, this variant meets criteria to be classified as pathogenic for autosomal dominant HBOC. ACMG/AMP Criteria applied: PVS1, PM2, PS4 Supporting.                                                                                                                                                                                                                                                                                                                                                                                                                                                                                                                                                                        |
| <i>BRCA2</i><br>1 | 13:32913296:A>T        | p.Lys1602X<br>Likely Pathogenic            | The p.Lys1602X variant in <i>BRCA2</i> has not been previously reported in individuals with hereditary breast and/or ovarian cancer (HBOC) and was absent from large population studies. This nonsense variant leads to a premature termination codon at position 1602, which is predicted to lead to a truncated or absent protein. Loss of function of the <i>BRCA2</i> gene is an established disease mechanism in autosomal dominant HBOC. In summary, although additional studies are required to fully establish its clinical significance, this variant meets criteria to be classified as likely pathogenic for autosomal dominant HBOC. ACMG/AMP Criteria applied: PVS1, PM2.                                                                                                                                                                                                                                                                                                                                                                                                                                                                                                                        |
| <i>BRCA2</i><br>1 | 13:32913351:T>G        | p.Leu1620X<br>Pathogenic                   | The p.Leu1620X variant in <i>BRCA2</i> has been reported in at least 4 individuals with breast or ovarian cancer (Risch 2001, Zhang 2011, BIC database). It has also been identified in 1/113080 European chromosomes by gnomAD ( <a href="http://gnomad.broadinstitute.org">http://gnomad.broadinstitute.org</a> ); however, this frequency is low enough to be consistent with the frequency of hereditary breast and ovarian cancer (HBOC) in the general population. This variant leads to a premature termination codon at position 1620, which is predicted to lead to a truncated or absent protein. Loss of function of the <i>BRCA2</i> gene is an established disease mechanism in autosomal dominant hereditary breast and ovarian cancer syndrome (HBOC). Additionally, this variant was classified as Pathogenic on Sept 8, 2016 by the ClinGen-approved ENIGMA expert panel (Variation ID: 51730). In summary, this variant meets criteria to be classified as pathogenic for autosomal dominant HBOC. ACMG/AMP Criteria applied: PVS1, PM2, PS4 Supporting.                                                                                                                                    |
| <i>BRCA2</i><br>1 | 13:32913457:C>A        | p.Tyr1655X<br>Pathogenic                   | The p.Tyr1655X variant in <i>BRCA2</i> has been reported in at least 8 individuals with <i>BRCA2</i> -associated cancers (Ramus 2007, Bayraktar 2012, Castro 2013, Chong 2014, Tung 2015, Susswein 2016). This variant has also been identified in 2/125700 European chromosomes by the Genome Aggregation Database (GnomAD, <a href="http://gnomad.broadinstitute.org">http://gnomad.broadinstitute.org</a> ); however, this frequency is low enough to be consistent with the frequency of hereditary breast and ovarian cancer (HBOC) in the general population. This nonsense variant leads to a premature termination codon at position 1655, which is predicted to lead to a truncated or absent protein. Heterozygous loss of <i>BRCA2</i> function is an established disease mechanism in hereditary breast and ovarian cancer (HBOC). In summary, this variant meets criteria to be classified as pathogenic for HBOC in an autosomal dominant manner based upon the predicted impact to the protein and low frequency in controls. ACMG/AMP criteria applied: PVS1, PS4 Moderate, PM2 Supporting.                                                                                                   |
| <i>BRCA2</i><br>1 | 13:32913457:C>G        | p.Tyr1655X<br>Pathogenic                   | The p.Tyr1655X variant in <i>BRCA2</i> has been reported in at least 8 individuals with <i>BRCA2</i> -associated cancers (Ramus 2007, Bayraktar 2012, Castro 2013, Chong 2014, Tung 2015, Susswein 2016). This variant has also been identified in 2/125700 European chromosomes by the Genome Aggregation Database (GnomAD, <a href="http://gnomad.broadinstitute.org">http://gnomad.broadinstitute.org</a> ); however, this frequency is low enough to be consistent with the frequency of hereditary breast and ovarian cancer (HBOC) in the general population. This nonsense variant leads to a premature termination codon at position 1655, which is predicted to lead to a truncated or absent protein. Heterozygous loss of <i>BRCA2</i> function is an established disease mechanism in hereditary breast and ovarian cancer (HBOC). In summary, this variant meets criteria to be classified as pathogenic for HBOC in an autosomal dominant manner based upon the predicted impact to the protein and low frequency in controls. ACMG/AMP criteria applied: PVS1, PS4 Moderate, PM2 Supporting.                                                                                                   |
| <i>BRCA2</i><br>1 | 13:32913620:TAT<br>G>- | p.Tyr1710X<br>Pathogenic                   | The p.Tyr1710X variant in <i>BRCA2</i> (resulting from c.5130_5133delTGTA) has been reported in >15 individuals with <i>BRCA2</i> -related cancers (Friedman 1997, de Juan Jiménez 2013, Maxwell 2017, Na 2017, Wong-Brown 2015, Soumitra 2009, Pritzlaff 2017, BIC database). It has also been identified in 1/15268 African chromosomes by gnomAD ( <a href="http://gnomad.broadinstitute.org">http://gnomad.broadinstitute.org</a> ); however, this frequency is low enough to be consistent with the frequency of hereditary breast and ovarian cancer (HBOC) in the general population. This frameshift variant is predicted to lead to a premature termination codon at position 1710, which is predicted to lead to a truncated or absent protein. Loss of function of the <i>BRCA2</i> gene is an established disease mechanism in autosomal dominant hereditary breast and ovarian cancer syndrome (HBOC). Additionally, this variant was classified as Pathogenic on Apr 22, 2016 by the ClinGen-approved ENIGMA expert panel (Variation ID: 51775). In summary, this variant meets criteria to be classified as pathogenic for autosomal dominant HBOC. ACMG/AMP Criteria applied: PVS1, PM2, PS4. |
| <i>BRCA2</i><br>1 | 13:32913857:A>T        | p.Lys1789X<br>Likely Pathogenic            | The p.Lys1789X variant in <i>BRCA2</i> has not been previously reported in individuals with hereditary breast and/or ovarian cancer (HBOC) and was absent from large population studies, but has been reported in ClinVar (Variation ID: 266875). This nonsense variant leads to a premature termination codon at position 1789, which is predicted to lead to a truncated or absent protein. Loss of function of the <i>BRCA2</i> gene is an established disease mechanism in autosomal dominant HBOC. In summary, although additional studies are required to fully establish its clinical significance, this variant meets criteria to be classified as likely pathogenic for autosomal dominant HBOC. ACMG/AMP Criteria applied: PVS1, PM2.                                                                                                                                                                                                                                                                                                                                                                                                                                                               |
| <i>BRCA2</i><br>1 | 13:32914452:A>-        | p.Gln1987ArgfsX1<br>7<br>Likely Pathogenic | The p.Gln1987ArgfsX17 variant in <i>BRCA2</i> has not been previously reported in individuals with hereditary breast and/or ovarian cancer (HBOC) and was absent from large population studies. This variant is predicted to cause a frameshift, which alters the protein's amino acid sequence beginning at position 1987 and leads to a premature termination codon 17 amino acids downstream. This alteration is then predicted to lead to a truncated or absent protein. Loss of function of the <i>BRCA2</i> gene is an established disease mechanism in autosomal dominant HBOC. In summary, although additional studies are required to fully establish its clinical significance, this variant meets criteria to be classified as likely pathogenic for autosomal dominant HBOC. ACMG/AMP Criteria applied: PVS1, PM2.                                                                                                                                                                                                                                                                                                                                                                                |

|                   |                        |                                       |                                                                                                                                                                                                                                                                                                                                                                                                                                                                                                                                                                                                                                                                                                                                                                                                                                                                                                                                                                                                                                                                                                                                                                                                                                                       |
|-------------------|------------------------|---------------------------------------|-------------------------------------------------------------------------------------------------------------------------------------------------------------------------------------------------------------------------------------------------------------------------------------------------------------------------------------------------------------------------------------------------------------------------------------------------------------------------------------------------------------------------------------------------------------------------------------------------------------------------------------------------------------------------------------------------------------------------------------------------------------------------------------------------------------------------------------------------------------------------------------------------------------------------------------------------------------------------------------------------------------------------------------------------------------------------------------------------------------------------------------------------------------------------------------------------------------------------------------------------------|
| <i>BRCA2</i><br>1 | 13:32914954:TC>-       | p.Gln2157IlefsX18<br>Pathogenic       | The p.Gln2157IlefsX18 variant in <i>BRCA2</i> has been reported in >30 individuals with <i>BRCA2</i> -associated cancers (Vietri 2012, Ghiorzio 2012, Manoukian 2007, Gao 2000, Veschi 2009, Papi 2007, Breast Cancer Information Core (BIC) database) and was absent from large population studies. This variant is predicted to cause a frameshift, which alters the protein's amino acid sequence beginning at position 2157 and leads to a premature termination codon 18 amino acids downstream. This alteration is then predicted to lead to a truncated or absent protein. Heterozygous loss of function of the <i>BRCA2</i> gene is an established disease mechanism in individuals with hereditary breast and ovarian cancer (HBOC). In addition, this variant was classified as Pathogenic on April 22, 2016 by the ClinGen-approved ENIGMA expert panel (ClinVar SCV000282426.1). In summary, this variant meets criteria to be classified as pathogenic for HBOC in an autosomal dominant manner based upon the predicted impact to the protein. ACMG/AMP Criteria applied: PVS1, PS4, PM2.                                                                                                                                               |
| <i>BRCA2</i><br>1 | 13:32915044:G>-        | p.Ala2185LeufsX6<br>Pathogenic        | The p.Ala2185LeufsX6 variant in <i>BRCA2</i> has been reported in at least 8 individuals with breast cancer (Kim 2012, Park 2017, Sun 2017, Li 2018, BIC database). It was absent from large population studies. This variant is predicted to cause a frameshift, which alters the protein's amino acid sequence beginning at position 2185 and leads to a premature termination codon 6 amino acids downstream. This alteration is then predicted to lead to a truncated or absent protein. Loss of function of the <i>BRCA2</i> gene is an established disease mechanism in autosomal dominant hereditary breast and ovarian cancer syndrome (HBOC). Additionally, this variant was classified as Pathogenic on Sept 8, 2016 by the ClinGen-approved ENIGMA expert panel (Variation ID: 52127). In summary, this variant meets criteria to be classified as pathogenic for autosomal dominant HBOC. ACMG/AMP Criteria applied: PVS1, PM2, PS4 Moderate.                                                                                                                                                                                                                                                                                             |
| <i>BRCA2</i><br>1 | 13:32915078:AA>-       | p.Lys2196AsnfsX2<br>Likely Pathogenic | The p.Lys2196AsnfsX2 variant in <i>BRCA2</i> has not been previously reported in individuals with hereditary breast and/or ovarian cancer (HBOC) and was absent from large population studies, but has been reported in ClinVar (Variation ID: 236280). This variant is predicted to cause a frameshift, which alters the protein's amino acid sequence beginning at position 2196 and leads to a premature termination codon 2 amino acids downstream. This alteration is then predicted to lead to a truncated or absent protein. Loss of function of the <i>BRCA2</i> gene is an established disease mechanism in autosomal dominant HBOC. In summary, although additional studies are required to fully establish its clinical significance, this variant meets criteria to be classified as likely pathogenic for autosomal dominant HBOC. ACMG/AMP Criteria applied: PVS1, PM2.                                                                                                                                                                                                                                                                                                                                                                 |
| <i>BRCA2</i><br>1 | 13:32915094:C>-        | p.Ser2201LeufsX5<br>Likely Pathogenic | The p.Ser2201LeufsX5 variant in <i>BRCA2</i> has not been previously reported in individuals with hereditary breast and/or ovarian cancer (HBOC) and was absent from large population studies, but has been reported in ClinVar (Variation ID: 96839). This variant is predicted to cause a frameshift, which alters the protein's amino acid sequence beginning at position 2201 and leads to a premature termination codon 5 amino acids downstream. This alteration is then predicted to lead to a truncated or absent protein. Loss of function of the <i>BRCA2</i> gene is an established disease mechanism in autosomal dominant HBOC. In summary, although additional studies are required to fully establish its clinical significance, this variant meets criteria to be classified as likely pathogenic for autosomal dominant HBOC. ACMG/AMP Criteria applied: PVS1, PM2.                                                                                                                                                                                                                                                                                                                                                                  |
| <i>BRCA2</i><br>1 | 13:32920968:AAT<br>A>- | p.Ile2315LysfsX12<br>Pathogenic       | The p.Ile2315LysfsX12 variant in <i>BRCA2</i> has been reported in at least 15 families with breast and/or ovarian cancer (Frank 1998, Wong-Brown 2015, Evans 2008, Teer 2016, BIC database). It has also been identified in 2/113008 European chromosomes by gnomAD ( <a href="http://gnomad.broadinstitute.org">http://gnomad.broadinstitute.org</a> ); however, this frequency is low enough to be consistent with the frequency of hereditary breast and ovarian cancer (HBOC) in the general population. This variant is predicted to cause a frameshift, which alters the protein's amino acid sequence beginning at position 2315 and leads to a premature termination codon 12 amino acids downstream. This alteration is then predicted to lead to a truncated or absent protein. Loss of function of the <i>BRCA2</i> gene is an established disease mechanism in autosomal dominant hereditary breast and ovarian cancer syndrome (HBOC). Additionally, this variant was classified as Pathogenic on Sept 8, 2016 by the ClinGen-approved ENIGMA expert panel (Variation ID: 91435). In summary, this variant meets criteria to be classified as pathogenic for autosomal dominant HBOC. ACMG/AMP Criteria applied: PVS1, PM2, PS4 Strong. |
| <i>BRCA2</i><br>1 | 13:32929208:TG>-       | p.Val2407SerfsX4<br>Likely Pathogenic | The p.Val2407SerfsX4 variant in <i>BRCA2</i> has not been previously reported in individuals with hereditary breast and/or ovarian cancer (HBOC) and was absent from large population studies. This variant is predicted to cause a frameshift, which alters the protein's amino acid sequence beginning at position 2407 and leads to a premature termination codon 4 amino acids downstream. This alteration is then predicted to lead to a truncated or absent protein. Loss of function of the <i>BRCA2</i> gene is an established disease mechanism in autosomal dominant HBOC. In summary, although additional studies are required to fully establish its clinical significance, this variant meets criteria to be classified as likely pathogenic for autosomal dominant HBOC. ACMG/AMP Criteria applied: PVS1, PM2.                                                                                                                                                                                                                                                                                                                                                                                                                          |
| <i>BRCA2</i><br>1 | 13:32929350:A>-        | p.Ile2454PhefsX13<br>Pathogenic       | The p.Ile2454PhefsX13 variant in <i>BRCA2</i> has been reported in 2 individuals with breast cancer (BIC database) and was absent from large population studies. This variant is predicted to cause a frameshift, which alters the protein's amino acid sequence beginning at position 2454 and leads to a premature termination codon 13 amino acids downstream. This alteration is then predicted to lead to a truncated or absent protein. Loss of function of the <i>BRCA2</i> gene is an established disease mechanism in autosomal dominant HBOC. Additionally, this variant was classified as Pathogenic on Apr 22, 2016 by the ClinGen-approved ENIGMA expert panel (Variation ID: 52312). In summary, this variant meets criteria to be classified as pathogenic for autosomal dominant HBOC. ACMG/AMP Criteria applied: PVS1, PM2, PS4 Supporting.                                                                                                                                                                                                                                                                                                                                                                                          |
| <i>BRCA2</i><br>1 | 13:32930687:C>T        | p.Arg2520X<br>Pathogenic              | The p.Arg2520X variant in <i>BRCA2</i> has been reported in >40 individuals with <i>BRCA2</i> -associated cancers (Håkansson 1997, Bayraktar 2012, Castéra 2014, Schultheis 2014, Breast Cancer Information Core (BIC) database), and segregated with associated cancers in 2 affected relatives from 1 family. This variant has also been identified in 3/113554 European chromosomes by the Genome Aggregation Database (GnomAD, <a href="http://gnomad.broadinstitute.org">http://gnomad.broadinstitute.org</a> ); however, this frequency is low enough to be consistent with the frequency of hereditary breast and ovarian cancer (HBOC) in the general population. This nonsense variant leads to a premature termination codon at position 2520, which is predicted to lead to a truncated or absent protein. Heterozygous loss of <i>BRCA2</i> function is an established disease mechanism in hereditary breast and ovarian cancer (HBOC). In summary, this variant meets criteria to be classified as pathogenic for HBOC in an autosomal dominant manner based on the                                                                                                                                                                     |

|                   |                        |                                            |                                                                                                                                                                                                                                                                                                                                                                                                                                                                                                                                                                                                                                                                                                                                                                                                                                                                                                                                                                                                                                                                                                                                                                                                                                                                                                                    |
|-------------------|------------------------|--------------------------------------------|--------------------------------------------------------------------------------------------------------------------------------------------------------------------------------------------------------------------------------------------------------------------------------------------------------------------------------------------------------------------------------------------------------------------------------------------------------------------------------------------------------------------------------------------------------------------------------------------------------------------------------------------------------------------------------------------------------------------------------------------------------------------------------------------------------------------------------------------------------------------------------------------------------------------------------------------------------------------------------------------------------------------------------------------------------------------------------------------------------------------------------------------------------------------------------------------------------------------------------------------------------------------------------------------------------------------|
|                   |                        |                                            | low frequency in controls, presence in affected individuals, and predicted impact to the protein. ACMG/AMP Criteria applied: PVS1, PS4, PM2 Supporting.                                                                                                                                                                                                                                                                                                                                                                                                                                                                                                                                                                                                                                                                                                                                                                                                                                                                                                                                                                                                                                                                                                                                                            |
| <i>BRCA2</i><br>1 | 13:32930706:CAG<br>T>- | p.Ala2526GlufsX24<br>Likely Pathogenic     | The p.Ala2526GlufsX24 variant in <i>BRCA2</i> has not been previously reported in individuals with hereditary breast and/or ovarian cancer (HBOC) and was absent from large population studies. This variant is predicted to cause a frameshift, which alters the protein's amino acid sequence beginning at position 2526 and leads to a premature termination codon 24 amino acids downstream. This alteration is then predicted to lead to a truncated or absent protein. Loss of function of the <i>BRCA2</i> gene is an established disease mechanism in autosomal dominant HBOC. In summary, although additional studies are required to fully establish its clinical significance, this variant meets criteria to be classified as likely pathogenic for autosomal dominant HBOC. ACMG/AMP Criteria applied: PVS1, PM2.                                                                                                                                                                                                                                                                                                                                                                                                                                                                                     |
| <i>BRCA2</i><br>1 | 13:32930711:->A        | p.Gly2528GlufsX11<br>Likely Pathogenic     | The p.Gly2528GlufsX11 variant in <i>BRCA2</i> has not been previously reported in individuals with hereditary breast and/or ovarian cancer (HBOC) and was absent from large population studies. This variant is predicted to cause a frameshift, which alters the protein's amino acid sequence beginning at position 2528 and leads to a premature termination codon 11 amino acids downstream. This alteration is then predicted to lead to a truncated or absent protein. Loss of function of the <i>BRCA2</i> gene is an established disease mechanism in autosomal dominant HBOC. In summary, although additional studies are required to fully establish its clinical significance, this variant meets criteria to be classified as likely pathogenic for autosomal dominant HBOC. ACMG/AMP Criteria applied: PVS1, PM2.                                                                                                                                                                                                                                                                                                                                                                                                                                                                                     |
| <i>BRCA2</i><br>1 | 13:32932018:G>A        | p.Trp2586X<br>Pathogenic                   | The p.Trp2586X variant in <i>BRCA2</i> has been reported in at least 14 individuals with <i>BRCA2</i> -related cancer (Perkowska 2003, Willems-Jones 2012, George 2013, Li 2018, BIC database). It has also been identified in 2/113726 European chromosomes by gnomAD ( <a href="http://gnomad.broadinstitute.org">http://gnomad.broadinstitute.org</a> ); however, this frequency is low enough to be consistent with the frequency of hereditary breast and ovarian cancer (HBOC) in the general population. This variant leads to a premature termination codon at position 2586, which is predicted to lead to a truncated or absent protein. Loss of function of the <i>BRCA2</i> gene is an established disease mechanism in autosomal dominant hereditary breast and ovarian cancer syndrome (HBOC). Another variant, c.7758G>A, resulting in the same amino acid change has been identified in individuals with <i>BRCA2</i> -related cancers and is classified as pathogenic by this laboratory. Additionally, this variant was classified as Pathogenic on Apr 22, 2016 by the ClinGen-approved ENIGMA expert panel (Variation ID: 52401). In summary, this variant meets criteria to be classified as pathogenic for autosomal dominant HBOC. ACMG/AMP Criteria applied: PVS1, PM2, PS4 Moderate, PS1. |
| <i>BRCA2</i><br>1 | 13:32936737:->A        | p.Trp2629MetfsX1<br>2<br>Likely Pathogenic | The p.Trp2629MetfsX12 variant in <i>BRCA2</i> has not been previously reported in individuals with hereditary breast and/or ovarian cancer (HBOC) and was absent from large population studies, but has been reported in ClinVar (Variation ID: 52431). This variant is predicted to cause a frameshift, which alters the protein's amino acid sequence beginning at position 2629 and leads to a premature termination codon 12 amino acids downstream. This alteration is then predicted to lead to a truncated or absent protein. Loss of function of the <i>BRCA2</i> gene is an established disease mechanism in autosomal dominant HBOC. In summary, although additional studies are required to fully establish its clinical significance, this variant meets criteria to be classified as likely pathogenic for autosomal dominant HBOC. ACMG/AMP Criteria applied: PVS1, PM2.                                                                                                                                                                                                                                                                                                                                                                                                                             |
| <i>BRCA2</i><br>1 | 13:32936812:T>C        | p.Leu2653Pro<br>Likely Pathogenic          | The p.Leu2653Pro variant in <i>BRCA2</i> has been reported in at least 3 individuals with breast cancer (Easton 2007, BIC database) and was absent from large population studies, but has been reported in ClinVar (Variation ID: 52447). In vitro assays provide some evidence that this variant impacts protein function (Biswas 2012, Guidugli 2014, Bernards 2016, Guidugli 2018, Mesman 2018); however, these types of assays may not accurately represent biological function. Computational prediction tools and conservation analyses suggest that this variant may impact the protein, though this information is not predictive enough to determine pathogenicity. In summary, although additional studies are required to fully establish its clinical significance, this variant meets criteria to be classified as likely pathogenic for autosomal dominant hereditary breast and ovarian cancer syndrome (HBOC). ACMG/AMP Criteria applied: PM2, PS3 Moderate, PP3, PS4 Supporting.                                                                                                                                                                                                                                                                                                                  |
| <i>BRCA2</i><br>1 | 13:32937327:A>T        | p.Glu2663Val<br>Likely Pathogenic          | The p.Glu2663Val variant in <i>BRCA2</i> has been reported in at least 9 individuals with <i>BRCA2</i> -associated cancers (Breast Cancer Information Core database: <a href="https://research.nhgri.nih.gov/projects/bic/">https://research.nhgri.nih.gov/projects/bic/</a> , Szabo 2000, Chevenix-Trench 2006, Borg 2010, Akbari 2011), and was absent from large population studies. In vitro functional studies suggest that this variant may alter protein function (Kuznetsov 2008, Farrugia 2008, Sanz 2010, Walker 2010, Whiley 2014, Fraile-Bethencourt 2017). Computational prediction tools and conservation analysis also suggest that the p.Glu2663Val variant may impact the protein. In addition, this variant was classified as pathogenic on August 10, 2015 by the ClinGen-approved ENIGMA expert panel (ClinVar SCV000244478.1). In summary, although additional studies are required to fully establish its clinical significance, the p.Glu2663Val variant is likely pathogenic. ACMG/AMP Criteria applied (Richards 2015): PM2, PS3_Supporting, PS4 Moderate, PP3.                                                                                                                                                                                                                           |
| <i>BRCA2</i><br>1 | 13:32937672:T>A        | c.8331+2T>A<br>Likely Pathogenic           | The c.8331+2T>A variant in <i>BRCA2</i> has not been previously reported in individuals with hereditary breast and/or ovarian cancer (HBOC) and was absent from large population studies, but has been reported in ClinVar (Variation ID: 91507). This variant occurs within the canonical splice site (+/- 1,2) and is predicted to cause altered splicing leading to an abnormal or absent protein. Loss of function of the <i>BRCA2</i> gene is an established disease mechanism in autosomal dominant HBOC. In summary, although additional studies are required to fully establish its clinical significance, this variant meets criteria to be classified as likely pathogenic for autosomal dominant HBOC. ACMG/AMP Criteria applied: PVS1, PM2.                                                                                                                                                                                                                                                                                                                                                                                                                                                                                                                                                            |
| <i>BRCA2</i><br>1 | 13:32937672:T>C        | c.8331+2T>C<br>Pathogenic                  | The c.8331+2T>C variant in <i>BRCA2</i> has been reported in at least 2 probands with <i>BRCA2</i> -related cancer (Cunningham 2014, Tung 2015). It was absent from large population studies, but has been reported in ClinVar (Variation ID: 267692). This variant occurs within the canonical splice site (+/- 1,2) and is predicted to cause altered splicing leading to an abnormal or absent protein. In vitro functional studies confirm that this variant leads to abnormal splicing (Fraile-Bethencourt 2017). In summary, this variant meets criteria to be classified as pathogenic for autosomal dominant hereditary breast and ovarian cancer (HBOC). ACMG/AMP Criteria applied: PVS1, PM2, PS4 Supporting.                                                                                                                                                                                                                                                                                                                                                                                                                                                                                                                                                                                            |



|                   |                      |                                        |                                                                                                                                                                                                                                                                                                                                                                                                                                                                                                                                                                                                                                                                                                                                                                                                                                                                                                                                                                                                                                                                                                                                                                                                                                                                                                                                                                                                                                                                                                             |
|-------------------|----------------------|----------------------------------------|-------------------------------------------------------------------------------------------------------------------------------------------------------------------------------------------------------------------------------------------------------------------------------------------------------------------------------------------------------------------------------------------------------------------------------------------------------------------------------------------------------------------------------------------------------------------------------------------------------------------------------------------------------------------------------------------------------------------------------------------------------------------------------------------------------------------------------------------------------------------------------------------------------------------------------------------------------------------------------------------------------------------------------------------------------------------------------------------------------------------------------------------------------------------------------------------------------------------------------------------------------------------------------------------------------------------------------------------------------------------------------------------------------------------------------------------------------------------------------------------------------------|
| <i>BRCA2</i><br>1 | 13:32945092:G>A      | c.8488-1G>A<br>Pathogenic              | The c.8488-1G>A variant in <i>BRCA2</i> has been reported in at least 8 probands with <i>BRCA2</i> -related cancers, as well as in one proband with Fanconi anemia who had this variant in the homozygous state (Acedo 2012, Santos 2014, Park 2017, Li 2018, Palmero 2018, Cotrim 2019). It was absent from large population studies, but has been reported in ClinVar (Variation ID: 38164). This variant occurs within the canonical splice site (+/- 1,2) and is predicted to cause altered splicing leading to an abnormal or absent protein. Sequencing of patient RNA confirms that this variant leads to abnormal splicing (Howlett 2002, Acedo 2012, Santos 2014). In summary, this variant meets criteria to be classified as pathogenic for autosomal dominant hereditary breast and ovarian cancer (HBOC). ACMG/AMP Criteria applied: PVS1, PM2, PS4 Moderate.                                                                                                                                                                                                                                                                                                                                                                                                                                                                                                                                                                                                                                  |
| <i>BRCA2</i><br>1 | 13:32953632:C>A      | p.Ser2978X<br>Pathogenic               | The p.Ser2978X variant (resulting from c.8933C>A) in <i>BRCA2</i> has been reported in at least 3 individuals with breast cancer (Scott 2003, BIC database). It was absent from large population studies. This variant leads to a premature termination codon at position 2978, which is predicted to lead to a truncated or absent protein. Loss of function of the <i>BRCA2</i> gene is an established disease mechanism in autosomal dominant hereditary breast and ovarian cancer syndrome (HBOC). Another variant at this position that leads to the same amino acid change (c.8933C>G) has also been reported in one proband with breast cancer (Momozawa 2018). This variant was classified as Pathogenic on Apr 22, 2016 by the ClinGen-approved ENIGMA expert panel (Variation ID: 52704). In summary, this variant meets criteria to be classified as pathogenic for autosomal dominant HBOC. ACMG/AMP Criteria applied: PVS1, PM2, PS4 Supporting, PS1.                                                                                                                                                                                                                                                                                                                                                                                                                                                                                                                                          |
| <i>BRCA2</i><br>1 | 13:32953987:TA><br>- | p.Ser3018ArgfsX3<br>Pathogenic         | The p.Ser3018ArgfsX3 variant in <i>BRCA2</i> has been reported in 2 individuals with breast cancer (BIC database). It has also been identified in 1/113052 European chromosomes by gnomAD ( <a href="http://gnomad.broadinstitute.org">http://gnomad.broadinstitute.org</a> ); however, this frequency is low enough to be consistent with the frequency of hereditary breast and ovarian cancer (HBOC) in the general population. This variant is predicted to cause a frameshift, which alters the protein's amino acid sequence beginning at position 3018 and leads to a premature termination codon 3 amino acids downstream. This alteration is then predicted to lead to a truncated or absent protein. Loss of function of the <i>BRCA2</i> gene is an established disease mechanism in autosomal dominant hereditary breast and ovarian cancer syndrome (HBOC). Additionally, this variant was classified as Pathogenic on Sep 8, 2016 by the ClinGen-approved ENIGMA expert panel (Variation ID: 52312). In summary, this variant meets criteria to be classified as pathogenic for autosomal dominant HBOC. ACMG/AMP Criteria applied: PVS1, PM2, PS4 Supporting.                                                                                                                                                                                                                                                                                                                                |
| <i>BRCA2</i><br>1 | 13:32954006:AT><br>- | p.Ile3025ThrfsX18<br>Likely Pathogenic | The p.Ile3025ThrfsX18 variant in <i>BRCA2</i> has been reported in 1 family with breast and/or ovarian cancer (Marroni 2004). It was absent from large population studies. This variant has also been reported in ClinVar (Variation ID: 52741). This variant is predicted to cause a frameshift, which alters the protein's amino acid sequence beginning at position 3025 and leads to a premature termination codon 18 amino acids downstream. This alteration is then predicted to lead to a truncated or absent protein. Loss of function of the <i>BRCA2</i> gene is an established disease mechanism in autosomal dominant hereditary breast and ovarian cancer syndrome (HBOC). In summary, although additional studies are required to fully establish its clinical significance, this variant meets criteria to be classified as likely pathogenic for autosomal dominant HBOC. ACMG/AMP Criteria applied: PVS1, PM2.                                                                                                                                                                                                                                                                                                                                                                                                                                                                                                                                                                             |
| <i>BRCA2</i><br>1 | 13:32954050:G>A      | p.Pro3039Pro<br>Pathogenic             | The p.Pro3039Pro (c.9117G>A) variant in <i>BRCA2</i> has been reported in at least 16 individuals with <i>BRCA2</i> -related cancer (Peelen 2000, Houdayer 2012, Willems-Jones 2012, de Juan 2015, Corman 2016, Labidi-Galy 2018, BIC database). It has also been identified in 1/111660 European chromosomes by gnomAD ( <a href="http://gnomad.broadinstitute.org">http://gnomad.broadinstitute.org</a> ); however, this frequency is low enough to be consistent with the frequency of hereditary breast and ovarian cancer (HBOC) in the general population. This variant has also been identified in ClinVar (Variation ID: 38215). This variant is located in the last base of the exon, which is part of the 5' splice region. Computational tools predict a splicing impact, and both in vitro studies and testing of patient RNA have shown that this variant results in exon skipping, which is predicted to lead to an absent or truncated protein (Peelen 2000, Acedo 2012, Houdayer 2012, Colombo 2013). Loss of function of the <i>BRCA2</i> gene is an established disease mechanism in autosomal dominant hereditary breast and ovarian cancer syndrome (HBOC). Another variant, c.9117G>T, resulting in the same synonymous change and predicted splicing impact has also been identified in individuals with <i>BRCA2</i> -related cancers. In summary, this variant meets criteria to be classified as pathogenic for autosomal dominant HBOC. ACMG/AMP Criteria applied: PS3, PM2, PS4. |
| <i>BRCA2</i><br>1 | 13:32968835:->T      | p.Val3091ArgfsX20<br>Likely Pathogenic | The p.Val3091ArgfsX20 variant in <i>BRCA2</i> has been reported in 1 individual with breast cancer (BIC database) and was absent from large population studies. This variant is predicted to cause a frameshift, which alters the protein's amino acid sequence beginning at position 3091 and leads to a premature termination codon 20 amino acids downstream. This alteration is then predicted to lead to a truncated or absent protein. Loss of function of the <i>BRCA2</i> gene is an established disease mechanism in autosomal dominant HBOC. Additionally, this variant was classified as Pathogenic on Apr 22, 2016 by the ClinGen-approved ENIGMA expert panel (Variation ID: 52797). In summary, although additional studies are required to fully establish its clinical significance, this variant meets criteria to be classified as likely pathogenic for autosomal dominant HBOC. ACMG/AMP Criteria applied: PVS1, PM2.                                                                                                                                                                                                                                                                                                                                                                                                                                                                                                                                                                   |
| <i>BRCA2</i><br>1 | 13:32968847:T>A      | p.Leu3093X<br>Likely Pathogenic        | The p.Leu3093X variant in <i>BRCA2</i> has not been previously reported in individuals with hereditary breast and/or ovarian cancer (HBOC) and was absent from large population studies. This nonsense variant leads to a premature termination codon at position 3093, which is predicted to lead to a truncated or absent protein. Loss of function of the <i>BRCA2</i> gene is an established disease mechanism in autosomal dominant HBOC. In summary, although additional studies are required to fully establish its clinical significance, this variant meets criteria to be classified as likely pathogenic for autosomal dominant HBOC. ACMG/AMP Criteria applied: PVS1, PM2.                                                                                                                                                                                                                                                                                                                                                                                                                                                                                                                                                                                                                                                                                                                                                                                                                      |
| <i>BRCA2</i><br>1 | 13:32968968:A>-      | p.Gly3134AlafsX29<br>Likely Pathogenic | The p.Gly3134AlafsX29 variant in <i>BRCA2</i> has not been previously reported in individuals with hereditary breast and/or ovarian cancer (HBOC) and was absent from large population studies. This variant is predicted to cause a frameshift, which alters the protein's amino acid sequence beginning at position 3134 and leads to a premature termination codon 29 amino acids downstream. This alteration is then predicted to lead to a truncated or absent protein. Loss of function of the <i>BRCA2</i> gene is an established disease mechanism in autosomal dominant HBOC. In summary, although additional studies are required to fully establish its clinical significance, this variant meets criteria to be classified as likely pathogenic for autosomal dominant HBOC. ACMG/AMP Criteria applied: PVS1, PM2.                                                                                                                                                                                                                                                                                                                                                                                                                                                                                                                                                                                                                                                                              |

|                    |                        |                                     |                                                                                                                                                                                                                                                                                                                                                                                                                                                                                                                                                                                                                                                                                                                                                                                                                                                                                                                                                                                                                                                                                                                                                                                                                                                                                                                   |
|--------------------|------------------------|-------------------------------------|-------------------------------------------------------------------------------------------------------------------------------------------------------------------------------------------------------------------------------------------------------------------------------------------------------------------------------------------------------------------------------------------------------------------------------------------------------------------------------------------------------------------------------------------------------------------------------------------------------------------------------------------------------------------------------------------------------------------------------------------------------------------------------------------------------------------------------------------------------------------------------------------------------------------------------------------------------------------------------------------------------------------------------------------------------------------------------------------------------------------------------------------------------------------------------------------------------------------------------------------------------------------------------------------------------------------|
| <i>BRCA2</i><br>1  | 13:32969001:TG><br>-   | p.Ser3147CysfsX2<br>Pathogenic      | The p.Ser3147CysfsX2 variant in <i>BRCA2</i> has been reported in >20 individuals with breast cancer (Cunningham 2014, Phelan 1996, BIC database). It has also been identified in 1/113672 European chromosomes by gnomAD ( <a href="http://gnomad.broadinstitute.org">http://gnomad.broadinstitute.org</a> ); however, this frequency is low enough to be consistent with the frequency of hereditary breast and ovarian cancer (HBOC) in the general population. This variant is predicted to cause a frameshift, which alters the protein's amino acid sequence beginning at position 3147 and leads to a premature termination codon 2 amino acids downstream. This alteration is then predicted to lead to a truncated or absent protein. Loss of function of the <i>BRCA2</i> gene is an established disease mechanism in autosomal dominant hereditary breast and ovarian cancer syndrome (HBOC). Additionally, this variant was classified as Pathogenic on Sep 8, 2016 by the ClinGen-approved ENIGMA expert panel (Variation ID: 38240). In summary, this variant meets criteria to be classified as pathogenic for autosomal dominant HBOC. ACMG/AMP Criteria applied: PVS1, PM2, PS4.                                                                                                                 |
| <i>BRCA2</i><br>11 | 13:32913558:->A        | p.Trp1692MetfsX3<br>Pathogenic      | The p.Trp1692MetfsX3 variant in <i>BRCA2</i> has been identified in >30 individuals of various ethnicities with Fanconi anemia or <i>BRCA2</i> -related cancers (Risch 2001, Offit 2003, Van Der Hout 2006, Laarabi 2011, Breast Cancer Information Core database). It has also been identified in 1/8884 Ashkenazi Jewish chromosomes by the Genome Aggregation Consortium (GnomAD, <a href="http://gnomad.broadinstitute.org">http://gnomad.broadinstitute.org</a> ). This frequency is low enough to be consistent with the frequency of hereditary breast and ovarian cancer (HBOC) in the general population. This variant is predicted to cause a frameshift, which alters the protein's amino acid sequence beginning at position 1692 and leads to a premature termination codon 3 amino acids downstream. This alteration is then predicted to lead to a truncated or absent protein. Heterozygous loss of function of the <i>BRCA2</i> gene is an established disease mechanism in HBOC. In addition, this variant was classified as Pathogenic on April 22, 2016 by the ClinGen-approved ENIGMA expert panel (ClinVar SCV000282397.1). In summary, this variant meets our criteria to be classified as pathogenic for HBOC in an autosomal dominant manner. ACMG/AMP criteria applied: PVS1, PS4, PM2. |
| <i>BRCA2</i><br>2  | 13:32912036:TT>-       | p.Phe1182X<br>Pathogenic            | The p.Phe1182X variant in <i>BRCA2</i> has been reported in >15 individuals with <i>BRCA2</i> -associated cancers (Breast Cancer Information Core (BIC) database, Lubinski 2004, Borg 2010, Tea 2014, Belanger 2015, Polsler 2016). It has also been identified in 5/113332 European chromosomes by the Genome Aggregation Database (GnomAD, <a href="http://gnomad.broadinstitute.org">http://gnomad.broadinstitute.org</a> ); however, this frequency is low enough to be consistent with the frequency of hereditary breast and ovarian cancer (HBOC) in the general population. This variant creates a premature termination codon at position 1182, which is predicted to lead to a truncated or absent protein. Heterozygous loss of function of the <i>BRCA2</i> gene is an established disease mechanism in HBOC. Furthermore, the p.Phe1182X variant was classified as Pathogenic on April 22, 2016 by the ClinGen-approved ENIGMA expert panel (ClinVar SCV000282379.1). In summary, this variant meets criteria to be classified as pathogenic for HBOC in an autosomal dominant manner. ACMG/AMP criteria applied: PVS1, PS4.                                                                                                                                                                         |
| <i>BRCA2</i><br>2  | 13:32912090:TG><br>-   | p.Cys1200X<br>Pathogenic            | The p.Cys1200X variant in <i>BRCA2</i> (resulting from c.3599_3600delGT) has been reported in at least 13 individuals with <i>BRCA2</i> -related cancers (De Leon Matsuda 2002, Cunningham 2014, Susswein 2016, Hirasawa 2017, Momozawa 2018, BIC database). It has also been identified in 1/18394 East Asian chromosomes by gnomAD ( <a href="http://gnomad.broadinstitute.org">http://gnomad.broadinstitute.org</a> ); however, this frequency is low enough to be consistent with the frequency of hereditary breast and ovarian cancer (HBOC) in the general population. This frameshift variant is predicted to lead to a premature termination codon at position 1200. Loss of function of the <i>BRCA2</i> gene is an established disease mechanism in autosomal dominant hereditary breast and ovarian cancer syndrome (HBOC). Additionally, this variant was classified as Pathogenic on Apr 22, 2016 by the ClinGen-approved ENIGMA expert panel (Variation ID: 51493). In summary, this variant meets criteria to be classified as pathogenic for autosomal dominant HBOC. ACMG/AMP Criteria applied: PVS1, PM2, PS4 Moderate.                                                                                                                                                                        |
| <i>BRCA2</i><br>2  | 13:32912767:->A        | p.Thr1426AsnfsX1<br>2<br>Pathogenic | The p.Thr1426AsnfsX12 variant in <i>BRCA2</i> (resulting from c.4276dupA) has been reported in at least 5 individuals with <i>BRCA2</i> -related cancers (Lubinski 2004, Crawford 2017, BIC database). It was absent from large population studies. This variant is predicted to cause a frameshift, which alters the protein's amino acid sequence beginning at position 1426 and leads to a premature termination codon 12 amino acids downstream. This alteration is then predicted to lead to a truncated or absent protein. Loss of function of the <i>BRCA2</i> gene is an established disease mechanism in autosomal dominant hereditary breast and ovarian cancer syndrome (HBOC). Additionally, this variant was classified as Pathogenic on Sept 8 2016 by the ClinGen-approved ENIGMA expert panel (Variation ID: 37891). In summary, this variant meets criteria to be classified as pathogenic for autosomal dominant HBOC. ACMG/AMP Criteria applied: PVS1, PM2, PS4 Supporting.                                                                                                                                                                                                                                                                                                                    |
| <i>BRCA2</i><br>2  | 13:32912902:AAG<br>A>- | p.Lys1472ThrfsX6<br>Pathogenic      | The p.Lys1472ThrfsX6 variant in <i>BRCA2</i> has been reported in at least 5 individuals with <i>BRCA2</i> -related cancers (Hansen 2017, Li 2018, Pietschmann 2005, Konstantopoulou 2014). It has also been identified in 1/112594 European chromosomes by gnomAD ( <a href="http://gnomad.broadinstitute.org">http://gnomad.broadinstitute.org</a> ); however, this frequency is low enough to be consistent with the frequency of hereditary breast and ovarian cancer (HBOC) in the general population. This variant is predicted to cause a frameshift, which alters the protein's amino acid sequence beginning at position 1472 and leads to a premature termination codon 6 amino acids downstream. This alteration is then predicted to lead to a truncated or absent protein. Loss of function of the <i>BRCA2</i> gene is an established disease mechanism in autosomal dominant hereditary breast and ovarian cancer syndrome (HBOC). Additionally, this variant was classified as Pathogenic on Sept 8 2016 by the ClinGen-approved ENIGMA expert panel (Variation ID: 37902). In summary, this variant meets criteria to be classified as pathogenic for autosomal dominant HBOC. ACMG/AMP Criteria applied: PVS1, PM2, PS4 Moderate.                                                               |
| <i>BRCA2</i><br>2  | 13:32913366:AA><br>-   | p.Asn1626SerfsX12<br>Pathogenic     | The p.Asn1626SerfsX12 variant in <i>BRCA2</i> has been reported in >20 individuals with <i>BRCA2</i> -associated cancers (Risch 2001, Kote-Jarai 2011, Gonzalez-Garay 2013, Leongamornlert 2014, Meric-Bernstam 2016, Breast Cancer Information Core (BIC) database). This variant has also been identified in 2/112998 European chromosomes by the Genome Aggregation Database (GnomAD, <a href="http://gnomad.broadinstitute.org">http://gnomad.broadinstitute.org</a> ); however, this frequency is low enough to be consistent with the frequency of hereditary breast and ovarian cancer (HBOC) in the general population. This variant is predicted to cause a frameshift, which alters the protein's amino acid sequence beginning at position 1626 and leads to a premature termination codon 12 amino acids downstream. This alteration is then predicted to lead to a truncated or absent protein. Heterozygous loss of function of the <i>BRCA2</i> gene is an established disease mechanism in individuals with hereditary breast and ovarian cancer (HBOC). In addition, this variant was classified as Pathogenic on April 22, 2016 by the ClinGen-approved ENIGMA expert panel (ClinVar SCV000282396.1). In                                                                                        |

|                   |                        |                                |                                                                                                                                                                                                                                                                                                                                                                                                                                                                                                                                                                                                                                                                                                                                                                                                                                                                                                                                                                                                                                                                                                                                                                                                                                                                                                                 |
|-------------------|------------------------|--------------------------------|-----------------------------------------------------------------------------------------------------------------------------------------------------------------------------------------------------------------------------------------------------------------------------------------------------------------------------------------------------------------------------------------------------------------------------------------------------------------------------------------------------------------------------------------------------------------------------------------------------------------------------------------------------------------------------------------------------------------------------------------------------------------------------------------------------------------------------------------------------------------------------------------------------------------------------------------------------------------------------------------------------------------------------------------------------------------------------------------------------------------------------------------------------------------------------------------------------------------------------------------------------------------------------------------------------------------|
|                   |                        |                                | summary, the p.Asn1626fs variant meets our criteria to be classified as pathogenic for HBOC in an autosomal dominant manner. ACMG/AMP criteria applied: PVS1, PS4.                                                                                                                                                                                                                                                                                                                                                                                                                                                                                                                                                                                                                                                                                                                                                                                                                                                                                                                                                                                                                                                                                                                                              |
| <i>BRCA2</i><br>2 | 13:32913778:TC>-       | p.Ser1764LysfsX3<br>Pathogenic | The p.Ser1764LysfsX3 variant in <i>BRCA2</i> has been reported in at least 5 individuals with breast or ovarian cancer (Reedy 2002, de Juan Jiménez 2013, Cunningham 2014, Song 2014, BIC database). It has also been identified in 1/113118 European chromosomes by gnomAD ( <a href="http://gnomad.broadinstitute.org">http://gnomad.broadinstitute.org</a> ); however, this frequency is low enough to be consistent with the frequency of hereditary breast and ovarian cancer (HBOC) in the general population. This variant is predicted to cause a frameshift, which alters the protein's amino acid sequence beginning at position 1764 and leads to a premature termination codon 3 amino acids downstream. This alteration is then predicted to lead to a truncated or absent protein. Loss of function of the <i>BRCA2</i> gene is an established disease mechanism in autosomal dominant hereditary breast and ovarian cancer syndrome (HBOC). Additionally, this variant was classified as Pathogenic on Sept 8 2016 by the ClinGen-approved ENIGMA expert panel (Variation ID: 37956). In summary, this variant meets criteria to be classified as pathogenic for autosomal dominant HBOC. ACMG/AMP Criteria applied: PVS1, PM2, PS4 Moderate.                                                    |
| <i>BRCA2</i><br>2 | 13:32914066:AAT<br>T>- | p.Ile1859LysfsX3<br>Pathogenic | The p.Ile1859LysfsX3 variant in <i>BRCA2</i> has been reported in >35 individuals with <i>BRCA2</i> -associated cancers (Saghir 2015, Kim 2016, Breast Cancer Information Core database). It has also been identified in 1/15994 African chromosomes by the Genome Aggregation Database (GnomAD, <a href="http://gnomad.broadinstitute.org">http://gnomad.broadinstitute.org</a> ); however, this frequency is low enough to be consistent with the frequency of hereditary breast and ovarian cancer (HBOC) in the general population. This variant is predicted to cause a frameshift, which alters the protein's amino acid sequence beginning at position 1859 and leads to a premature termination codon 3 amino acids downstream. This alteration is then predicted to lead to a truncated or absent protein. Heterozygous loss of function of the <i>BRCA2</i> gene is an established disease mechanism in HBOC. In addition, this variant was classified as Pathogenic on April 22, 2016 by the ClinGen-approved ENIGMA expert panel (ClinVar SCV000282408.1). In summary, this variant meets our criteria to be classified as pathogenic for HBOC in an autosomal dominant manner. ACMG/AMP criteria applied: PVS1, PS4, PM2.                                                                          |
| <i>BRCA2</i><br>2 | 13:32914174:C>G        | p.Tyr1894X<br>Pathogenic       | The p.Tyr1894X (c.5682C>G) variant in <i>BRCA2</i> has been reported in >20 individuals with <i>BRCA2</i> -related cancers (Risch 2001, Edwards 2010, Tea 2014, Alemar 2017, AlDubayan 2018, Dudley 2018, BIC database). Furthermore, another variant at this position resulting in the same amino acid change (c.5681dup, p.Tyr1894X) is classified as pathogenic for hereditary breast and ovarian cancer (HBOC) by our laboratory. The c.5682C>G variant has also been identified in 0.001% (1/113148) of European chromosomes by gnomAD ( <a href="http://gnomad.broadinstitute.org">http://gnomad.broadinstitute.org</a> ); however, this frequency is low enough to be consistent with the frequency of HBOC in the general population. This nonsense variant is predicted to lead to a premature termination codon at position 1894, which is predicted to lead to a truncated or absent protein. Loss of function of the <i>BRCA2</i> gene is an established disease mechanism in HBOC. Finally, the p.Tyr1894X (c.5682C>G) variant was classified as Pathogenic on Apr 22, 2016 by the ClinGen-approved ENIGMA expert panel (Variation ID: 37989). In summary, this variant meets criteria to be classified as pathogenic for autosomal dominant HBOC. ACMG/AMP Criteria applied: PVS1, PM2, PS4, PS1. |
| <i>BRCA2</i><br>2 | 13:32914210:CT>-       | p.Leu1908ArgfsX2<br>Pathogenic | The p.Leu1908ArgfsX2 variant in <i>BRCA2</i> has been reported in >40 individuals with <i>BRCA2</i> -associated cancers (Kwong 2009, Cherbal 2010, Zhang 2011, Edwards 2010, Breast Cancer Information Core (BIC) database). It has also been identified in 1/30598 South Asian chromosomes by the Genome Aggregation Database (GnomAD, <a href="http://gnomad.broadinstitute.org">http://gnomad.broadinstitute.org</a> ); however, this frequency is low enough to be consistent with the frequency of hereditary breast and ovarian cancer (HBOC) in the general population. This variant is predicted to cause a frameshift, which alters the protein's amino acid sequence beginning at position 1908 and leads to a premature termination codon 2 amino acids downstream. This alteration is then predicted to lead to a truncated or absent protein. Heterozygous loss of function of the <i>BRCA2</i> gene is an established disease mechanism in hereditary breast and ovarian cancer (HBOC). In summary, this variant meets criteria to be classified as pathogenic for HBOC in an autosomal dominant manner. ACMG/AMP criteria applied: PVS1, PS4, PM2.                                                                                                                                               |
| <i>BRCA2</i><br>2 | 13:32914401:C>A        | p.Ser1970X<br>Pathogenic       | The p.Ser1970X (c.5682C>A) variant in <i>BRCA2</i> has been reported in at least 12 individuals with <i>BRCA2</i> -related cancers (Gayther 1997, Edwards 2010, Leongamornlert 2014, Labidi-Galy 2018, BIC database) and was absent from large population studies. This nonsense variant is predicted to lead to a premature termination codon at position 1970, which is predicted to lead to a truncated or absent protein. Loss of function of the <i>BRCA2</i> gene is an established disease mechanism in autosomal dominant hereditary breast and ovarian cancer syndrome (HBOC). Additionally, this variant was classified as Pathogenic on Apr 22, 2016 by the ClinGen-approved ENIGMA expert panel (Variation ID: 38007). In summary, this variant meets criteria to be classified as pathogenic for autosomal dominant HBOC. ACMG/AMP Criteria applied: PVS1, PM2, PS4 Moderate.                                                                                                                                                                                                                                                                                                                                                                                                                      |
| <i>BRCA2</i><br>2 | 13:32914974:ACA<br>A>- | p.Lys2162AsnfsX5<br>Pathogenic | The p.Lys2162AsnfsX5 variant in <i>BRCA2</i> has been reported in greater than 30 individuals with <i>BRCA2</i> -associated cancer (de Juan Jimenez 2013, Edwards 2003, Edwards 2010, Labidi-Galy 2018, Li 2018, Nielsen 2016, Sun 2017; Breast Information Core database). It has been identified in 1/26026 South Asian and 1/29656 Latino chromosomes by gnomAD ( <a href="http://gnomad.broadinstitute.org">http://gnomad.broadinstitute.org</a> ). This variant was classified as Pathogenic on April 22, 2016 by the ClinGen-approved ENIGMA expert panel (Variation ID 38048). This variant is predicted to cause a frameshift, which alters the protein's amino acid sequence beginning at position 2162 and leads to a premature termination codon 5 amino acids downstream. This alteration is then predicted to lead to a truncated or absent protein. Loss of function of the <i>BRCA2</i> gene is an established disease mechanism in autosomal dominant hereditary breast and ovarian cancer syndrome. In summary, this variant meets criteria to be classified as pathogenic for autosomal dominant hereditary breast and ovarian cancer syndrome. ACMG/AMP Criteria applied: PVS1, PS4, PM2.                                                                                                    |
| <i>BRCA2</i><br>2 | 13:32930609:C>T        | p.Arg2494X<br>Pathogenic       | The p.Arg2494X variant in <i>BRCA2</i> has been reported in >20 individuals with <i>BRCA2</i> -related cancers and has been reported as a Finnish founder variant (Vehmanen 1997, Park 2016, Eoh 2017, Park 2017, Sun 2017, Weren 2017, Labidi-Galy 2018, Lee 2018, BIC database). It has also been identified in 4/21648 Finnish chromosomes by gnomAD ( <a href="http://gnomad.broadinstitute.org">http://gnomad.broadinstitute.org</a> ); however, this frequency is low enough to be consistent with the frequency of hereditary breast and ovarian cancer (HBOC) in the general population. This variant leads to a premature                                                                                                                                                                                                                                                                                                                                                                                                                                                                                                                                                                                                                                                                              |

|                   |                  |                                     |                                                                                                                                                                                                                                                                                                                                                                                                                                                                                                                                                                                                                                                                                                                                                                                                                                                                                                                                                                                                                                                                                                                                                                                                                                                                                                                                                                                                                                            |
|-------------------|------------------|-------------------------------------|--------------------------------------------------------------------------------------------------------------------------------------------------------------------------------------------------------------------------------------------------------------------------------------------------------------------------------------------------------------------------------------------------------------------------------------------------------------------------------------------------------------------------------------------------------------------------------------------------------------------------------------------------------------------------------------------------------------------------------------------------------------------------------------------------------------------------------------------------------------------------------------------------------------------------------------------------------------------------------------------------------------------------------------------------------------------------------------------------------------------------------------------------------------------------------------------------------------------------------------------------------------------------------------------------------------------------------------------------------------------------------------------------------------------------------------------|
|                   |                  |                                     | termination codon at position 2494, which is predicted to lead to a truncated or absent protein. Loss of function of the <i>BRCA2</i> gene is an established disease mechanism in autosomal dominant HBOC. Additionally, this variant was classified as Pathogenic on Apr 22, 2016 by the ClinGen-approved ENIGMA expert panel (Variation ID: 38099). In summary, this variant meets criteria to be classified as pathogenic for autosomal dominant HBOC. ACMG/AMP Criteria applied: PVS1, PS4.                                                                                                                                                                                                                                                                                                                                                                                                                                                                                                                                                                                                                                                                                                                                                                                                                                                                                                                                            |
| <i>BRCA2</i><br>2 | 13:32937507:A>C  | p.Asp2723Ala<br>Likely Pathogenic   | The p.Asp2723Ala variant in <i>BRCA2</i> has been reported in at least 4 individuals with breast cancer (Scott 2003, Gorringer 2008, BIC database). It has also been identified in 1/113396 European chromosomes by gnomAD ( <a href="http://gnomad.broadinstitute.org">http://gnomad.broadinstitute.org</a> ); however, this frequency is low enough to be consistent with the frequency of hereditary breast and ovarian cancer (HBOC) in the general population. This variant has also been reported in ClinVar (Variation ID: 52516). Computational prediction tools and conservation analyses suggest that this variant may impact the protein, though this information is not predictive enough to determine pathogenicity. In vitro assays provide some evidence that this variant impact protein function (Guidugli 2018); however, these types of assays may not accurately represent biological function. Another variant involving this codon (p.Asp2723His) has been identified in individuals with breast cancer and has been classified as Pathogenic by the ClinGen-approved ENIGMA expert panel. In summary, although additional studies are required to fully establish its clinical significance, this variant meets criteria to be classified as likely pathogenic for autosomal dominant hereditary breast and ovarian cancer syndrome (HBOC). ACMG/AMP Criteria applied: PM2, PS3 Moderate, PM5, PP3, PS4 Supporting. |
| <i>BRCA2</i><br>2 | 13:32937636:C>-  | p.Thr2766AsnfsX1<br>1<br>Pathogenic | The p.Thr2766AsnfsX11 (NM_000059.3 c.8297delC) variant in <i>BRCA2</i> (also referred to as c.8285delC in the literature) has been previously reported in many individuals and families with breast, ovarian or prostate cancer (Tavtigian 1996, Castro 2013, McVeigh 2014, Wong-Brown 2015), and was absent from large population studies. In addition, this variant was classified as Pathogenic by the ClinGen-approved ENIGMA expert panel (ClinVar SCV000282457.1). This variant is predicted to cause a frameshift, which alters the protein's amino acid sequence beginning at position 2766 and leads to a premature termination codon 11 amino acids downstream. This alteration is then predicted to lead to a truncated or absent protein. Heterozygous loss of <i>BRCA2</i> function is an established disease mechanism in hereditary breast and ovarian cancer syndrome (HBOC). In summary, this variant meets our criteria to be classified as pathogenic for HBOC in an autosomal dominant manner based on its occurrence in affected individuals and its predicted impact to the protein. ACMG/AMP Criteria applied: PVS1, PM2, PS4 Moderate, PP5 (Richards 2015).                                                                                                                                                                                                                                                        |
| <i>BRCA2</i><br>2 | 13:32944692:C>T  | p.Gln2829X<br>Pathogenic            | The p.Gln2829X variant in <i>BRCA2</i> has been reported in at least 6 individuals with hereditary breast and/or ovarian cancer (HBOC; Yang 2015, Shi 2017, Sun 2017, Wang 2018, BIC database). It was absent from large population studies. This nonsense variant leads to a premature termination codon at position 2829, which is predicted to lead to a truncated or absent protein. Loss of function of the <i>BRCA2</i> gene is an established disease mechanism in autosomal dominant hereditary breast and ovarian cancer syndrome (HBOC). Additionally, this variant was classified as Pathogenic on Dec 15, 2017 by the ClinGen-approved ENIGMA expert panel (Variation ID: 52600). In summary, this variant meets criteria to be classified as pathogenic for autosomal dominant HBOC. ACMG/AMP Criteria applied: PVS1, PM2, PS4 Moderate.                                                                                                                                                                                                                                                                                                                                                                                                                                                                                                                                                                                      |
| <i>BRCA2</i><br>2 | 13:32953602:C>-  | p.Val2969CysfsX7<br>Pathogenic      | The p.Val2969CysfsX7 variant in <i>BRCA2</i> has been reported at least 40 individuals with <i>BRCA2</i> -associated cancers (Claes 2004, Kote-Jarai 2011, Frank 1998, Breast Cancer Information Core (BIC) database), and was absent from large population studies. This variant is predicted to cause a frameshift, which alters the protein's amino acid sequence beginning at position 2969 and leads to a premature termination codon 7 amino acids downstream. This alteration is then predicted to lead to a truncated or absent protein. Heterozygous loss of function of the <i>BRCA2</i> gene is an established disease mechanism in hereditary breast and ovarian cancer (HBOC). In addition, this variant was classified as Pathogenic on April 22, 2016 by the ClinGen-approved ENIGMA expert panel (ClinVar SCV000282464.1). In summary, the p.Val2969CysfsX7 variant meets criteria to be classified as pathogenic for HBOC in an autosomal dominant manner based upon the predicted impact to the protein. ACMG/AMP Criteria applied: PVS1, PS4, PM2.                                                                                                                                                                                                                                                                                                                                                                      |
| <i>BRCA2</i><br>2 | 13:32968863:C>G  | p.Tyr3098X<br>Pathogenic            | The p.Tyr3098X (c.9294C>A) variant in <i>BRCA2</i> has been reported in at least 15 individuals with <i>BRCA2</i> -related cancers (Frank 1998, S/NI consortium 2003, Kerr 2016, Sun 2017, Bannon 2018, Wen 2018, BIC database). It has also been identified in 2/24950 African chromosomes by gnomAD ( <a href="http://gnomad.broadinstitute.org">http://gnomad.broadinstitute.org</a> ); however, this frequency is low enough to be consistent with the frequency of hereditary breast and ovarian cancer (HBOC) in the general population. This variant leads to a premature termination codon at position 3098, which is predicted to lead to a truncated or absent protein. Loss of function of the <i>BRCA2</i> gene is an established disease mechanism in autosomal dominant HBOC. This variant was classified as Pathogenic on Apr 22, 2016 by the ClinGen-approved ENIGMA expert panel (Variation ID: 38229). In summary, this variant meets criteria to be classified as pathogenic for autosomal dominant HBOC. ACMG/AMP Criteria applied: PVS1, PS4                                                                                                                                                                                                                                                                                                                                                                          |
| <i>BRCA2</i><br>3 | 13:32905147:AA>- | p.Glu260SerfsX15<br>Pathogenic      | The p.Glu260SerfsX15 variant in <i>BRCA2</i> has been reported in at least 3 individuals with breast or ovarian cancer (Chao 2016, Wen 2018, Couch 2015). Additionally, it was classified as Pathogenic on Sep. 8, 2016 by the ClinGen-approved ENIGMA expert panel (ClinVar Variation ID: 188425). It was absent from large population studies. This variant is predicted to cause a frameshift, which alters the protein's amino acid sequence beginning at position 260 and leads to a premature termination codon 15 amino acids downstream. This alteration is then predicted to lead to a truncated or absent protein. Loss of function of the <i>BRCA2</i> gene is an established disease mechanism in autosomal dominant hereditary breast and ovarian cancer syndrome (HBOC). In summary, this variant meets criteria to be classified as pathogenic for autosomal dominant HBOC. ACMG/AMP Criteria applied: PVS1, PM2, PS4 Supporting.                                                                                                                                                                                                                                                                                                                                                                                                                                                                                           |
| <i>BRCA2</i><br>3 | 13:32906407:A>G  | c.794-2A>G<br>Likely Pathogenic     | The c.794-2A>G variant in <i>BRCA2</i> has not been previously reported in individuals with hereditary breast and/or ovarian cancer (HBOC) and was absent from large population studies, but has been reported in ClinVar (Variation ID: 568479). This variant occurs within the canonical splice site (+/- 1,2) and is predicted to cause altered splicing leading to an abnormal or absent protein. Loss of function of the <i>BRCA2</i> gene is an established disease mechanism in autosomal dominant HBOC. In summary, although additional studies are required to fully establish its clinical significance, this variant meets criteria to be classified as likely pathogenic for autosomal dominant HBOC. ACMG/AMP Criteria applied: PVS1, PM2.                                                                                                                                                                                                                                                                                                                                                                                                                                                                                                                                                                                                                                                                                    |

|                   |                         |                                  |                                                                                                                                                                                                                                                                                                                                                                                                                                                                                                                                                                                                                                                                                                                                                                                                                                                                                                                                                                                                                                                                                                                                                                                                                                                                                                                                                                                                                 |
|-------------------|-------------------------|----------------------------------|-----------------------------------------------------------------------------------------------------------------------------------------------------------------------------------------------------------------------------------------------------------------------------------------------------------------------------------------------------------------------------------------------------------------------------------------------------------------------------------------------------------------------------------------------------------------------------------------------------------------------------------------------------------------------------------------------------------------------------------------------------------------------------------------------------------------------------------------------------------------------------------------------------------------------------------------------------------------------------------------------------------------------------------------------------------------------------------------------------------------------------------------------------------------------------------------------------------------------------------------------------------------------------------------------------------------------------------------------------------------------------------------------------------------|
| <i>BRCA2</i><br>3 | 13:32914551:AA<br>A>-   | p.Glu2020ValfsX19<br>Pathogenic  | The p.Glu2020ValfsX19 variant in <i>BRCA2</i> has been reported in at least 6 families with breast cancer (Heramb 2018, Bergman 2005, Grindedal 2017). It was absent from large population studies. This variant is predicted to cause a frameshift, which alters the protein's amino acid sequence beginning at position 2020 and leads to a premature termination codon 19 amino acids downstream. This alteration is then predicted to lead to a truncated or absent protein. Loss of function of the <i>BRCA2</i> gene is an established disease mechanism in autosomal dominant hereditary breast and ovarian cancer syndrome (HBOC). Additionally, this variant was classified as Pathogenic on Sept 8, 2016 by the ClinGen-approved ENIGMA expert panel (Variation ID: 91435). In summary, this variant meets criteria to be classified as pathogenic for autosomal dominant HBOC. ACMG/AMP Criteria applied: PVS1, PM2, PS4 Moderate.                                                                                                                                                                                                                                                                                                                                                                                                                                                                   |
| <i>BRCA2</i><br>3 | 13:32914894:TAA<br>CT>- | p.Asn2135LysfsX3<br>Pathogenic   | The p.Asn2135LysfsX3 variant in <i>BRCA2</i> has been reported in at least 12 individuals with <i>BRCA2</i> -associated cancers (Gayther 1997, Wagner 1999, Risch 2001, Gomes 2007, Machackova 2008, Kote-Jarai 2011, Zhang 2011, de Juan 2015, Hirotsu 2015, Breast Cancer Information Core database, www.research.nhgri.nih.gov/bic/). This variant has also been identified in 1/11488 of Latino chromosomes by the Exome Aggregation Consortium (ExAC, http://exac.broadinstitute.org; dbSNP rs80359585). This frequency is low enough to be consistent with the frequency of hereditary breast and ovarian cancer (HBOC) in the general population. This variant is predicted to cause a frameshift, which alters the protein's amino acid sequence beginning at position 2135 and leads to a premature termination codon 3 amino acids downstream. This alteration is then predicted to lead to a truncated or absent protein. Heterozygous loss of function of the <i>BRCA2</i> gene is an established disease mechanism in HBOC. In addition, this variant was classified as Pathogenic on April 22, 2016 by the ClinGen-approved ENIGMA expert panel (ClinVar SCV000282424.1). In summary, this variant meets our criteria to be classified as pathogenic for HBOC in an autosomal dominant manner based upon the predicted impact to the protein. ACMG/AMP Criteria applied: PVS1, PS4 Moderate, PM2. |
| <i>BRCA2</i><br>3 | 13:32945180:C>-         | p.Gln2859LysfsX4<br>Pathogenic   | The p.Gln2859LysfsX4 variant in <i>BRCA2</i> has been reported in >20 individuals with <i>BRCA2</i> -related cancers (Martin 2001, Pritchard 2016, Roed Nielsen 2016, BIC database). It was absent from large population databases. This variant is predicted to cause a frameshift, which alters the protein's amino acid sequence beginning at position 2859 and leads to a premature termination codon 4 amino acids downstream. This alteration is then predicted to lead to a truncated or absent protein. Loss of function of the <i>BRCA2</i> gene is an established disease mechanism in autosomal dominant hereditary breast and ovarian cancer syndrome (HBOC). Additionally, this variant was classified as Pathogenic on Apr 22, 2016 by the ClinGen-approved ENIGMA expert panel (Variation ID: 38169). In summary, this variant meets criteria to be classified as pathogenic for autosomal dominant HBOC. ACMG/AMP Criteria applied: PVS1, PM2, PS4.                                                                                                                                                                                                                                                                                                                                                                                                                                             |
| <i>BRCA2</i><br>3 | 13:32953886:G>A         | c.8954-1G>A<br>Likely Pathogenic | The c.8954-1G>A variant in <i>BRCA2</i> has not been previously reported in individuals with hereditary breast and/or ovarian cancer (HBOC) and was absent from large population studies, but has been reported in ClinVar (Variation ID: 531281). This variant occurs within the canonical splice site (+/- 1,2) and is predicted to cause altered splicing leading to an abnormal or absent protein. Loss of function of the <i>BRCA2</i> gene is an established disease mechanism in autosomal dominant HBOC. In summary, although additional studies are required to fully establish its clinical significance, this variant meets criteria to be classified as likely pathogenic for autosomal dominant HBOC. ACMG/AMP Criteria applied: PVS1, PM2.                                                                                                                                                                                                                                                                                                                                                                                                                                                                                                                                                                                                                                                        |
| <i>BRCA2</i><br>4 | 13:32912172:TG><br>-    | p.Leu1227GlnfsX5<br>Pathogenic   | The p.Leu1227GlnfsX5 variant in <i>BRCA2</i> has been reported in at least 8 individuals with <i>BRCA2</i> -associated cancers (Peto 1999, Risch 2001, Pal 2014, Breast Cancer Information Core (BIC) database). It has also been identified in 1/8710 African chromosomes by gnomAD (http://gnomad.broadinstitute.org); however, this frequency is low enough to be consistent with the frequency of hereditary breast and ovarian cancer (HBOC) in the general population. This variant is predicted to cause a frameshift, which alters the protein's amino acid sequence beginning at position 1227 and leads to a premature termination codon 5 amino acids downstream. This alteration is then predicted to lead to a truncated or absent protein. Heterozygous loss of function of the <i>BRCA2</i> gene is an established disease mechanism in hereditary breast and ovarian cancer (HBOC). In addition, this variant was classified as Pathogenic on April 22, 2016 by the ClinGen-approved ENIGMA expert panel (ClinVar SCV000282380.1). In summary, this variant meets our criteria to be classified as pathogenic for HBOC in an autosomal dominant manner based upon the predicted impact to the protein. ACMG/AMP criteria applied: PVS1, PS4 Moderate, PM2.                                                                                                                                      |
| <i>BRCA2</i><br>4 | 13:32914438:T>-         | p.Ser1982ArgfsX22<br>Pathogenic  | The p.Ser1982ArgfsX22 variant in <i>BRCA2</i> is a founder mutation in the Ashkenazi Jewish population (Finkelman 2012) and has been identified in >500 individuals of various ethnicities with <i>BRCA2</i> -associated cancers (Breast Cancer Information Core (BIC) database: https://research.nhgri.nih.gov/projects/bic/). It has also been identified in 0.6% (59/10151) Ashkenazi Jewish chromosomes and 10/126512 European chromosomes by the Genome Aggregation Database (gnomAD, http://gnomad.broadinstitute.org; dbSNP rs80359550). This variant is predicted to cause a frameshift, which alters the protein's amino acid sequence beginning at position 1982 and leads to a premature termination codon 22 amino acids downstream. This alteration is then predicted to lead to a truncated or absent protein. Heterozygous loss of function of the <i>BRCA2</i> gene is an established disease mechanism in individuals with hereditary breast and ovarian cancer (HBOC). Additionally, this variant was classified as pathogenic on April 22, 2016 by the ClinGen-approved ENIGMA expert panel (ClinVar SCV000282418.1). In summary, the p.Ser1982fs variant meets criteria to be classified as pathogenic for HBOC in an autosomal dominant manner based upon the predicted impact to the protein and presence in multiple affected individuals. ACMG/AMP Criteria applied: PVS1, PS4 Strong.  |
| <i>BRCA2</i><br>4 | 13:32914767:TT>-        | p.Leu2092ProfsX7<br>Pathogenic   | The p.Leu2092ProfsX7 variant in <i>BRCA2</i> has been reported >100 individuals with <i>BRCA2</i> -associated cancer (Breast Information Core Database (BIC)); Bayraktar 2012, de Juan 2015, Edwards 2010, Fostira 2018, Mijuskovic 2018, Walsh 2011, Wang 2018, Whitworth 2018, Wooster 1995, Zhang 2011). In addition, the p.Leu2080X variant was classified as Pathogenic on Apr 22, 2016 by the ClinGen-approved ENIGMA expert panel (ClinVar SCV000282422.1) and has been suggested to be a European founder mutation (Janavicius 2010). This variant has been identified in 0.005% (6/124234) of European chromosomes by the Genome Aggregation Database (gnomAD, http://gnomad.broadinstitute.org). It is predicted to cause a frameshift, which alters the protein's amino acid sequence beginning at position 2092 and leads to a premature termination codon 7 amino acids downstream. This alteration is then predicted to lead to a truncated or absent protein. Heterozygous loss of function of the                                                                                                                                                                                                                                                                                                                                                                                               |

|                   |                        |                                      |                                                                                                                                                                                                                                                                                                                                                                                                                                                                                                                                                                                                                                                                                                                                                                                                                                                                                                                                                                                                                                                                                                                                                                                                                                                                                                                                                                                                    |
|-------------------|------------------------|--------------------------------------|----------------------------------------------------------------------------------------------------------------------------------------------------------------------------------------------------------------------------------------------------------------------------------------------------------------------------------------------------------------------------------------------------------------------------------------------------------------------------------------------------------------------------------------------------------------------------------------------------------------------------------------------------------------------------------------------------------------------------------------------------------------------------------------------------------------------------------------------------------------------------------------------------------------------------------------------------------------------------------------------------------------------------------------------------------------------------------------------------------------------------------------------------------------------------------------------------------------------------------------------------------------------------------------------------------------------------------------------------------------------------------------------------|
|                   |                        |                                      | <i>BRCA2</i> gene is an established disease mechanism in hereditary breast and ovarian cancer (HBOC). In summary, this variant meets criteria to be classified as pathogenic for HBOC in an autosomal dominant manner. ACMG/AMP Criteria applied: PVS1, PS4, PM2.                                                                                                                                                                                                                                                                                                                                                                                                                                                                                                                                                                                                                                                                                                                                                                                                                                                                                                                                                                                                                                                                                                                                  |
| <i>BRCA2</i><br>5 | 13:32900720:CCA<br>C>- | p.Thr203LeufsX7<br>Likely Pathogenic | The p.Thr203LeufsX7 variant in <i>BRCA2</i> has not been previously reported in individuals with hereditary breast and/or ovarian cancer (HBOC) and was absent from large population studies. This variant is predicted to cause a frameshift, which alters the protein's amino acid sequence beginning at position 203 and leads to a premature termination codon 7 amino acids downstream. This alteration is then predicted to lead to a truncated or absent protein. Loss of function of the <i>BRCA2</i> gene is an established disease mechanism in autosomal dominant HBOC. In summary, although additional studies are required to fully establish its clinical significance, this variant meets criteria to be classified as likely pathogenic for autosomal dominant HBOC. ACMG/AMP Criteria applied: PVS1, PM2.                                                                                                                                                                                                                                                                                                                                                                                                                                                                                                                                                                         |
| <i>BRCA2</i><br>5 | 13:32911650:T>G        | p.Leu1053X<br>Pathogenic             | The p.Leu1053X variant in <i>BRCA2</i> has been reported in at least 11 individuals with <i>BRCA2</i> -related cancers (Lubinski 2004, Kote-Jarai 2011, Elimam 2017, Mijuskovic 2018, Sandhu 2013, BIC database) and was absent from large population studies. This nonsense variant creates a premature termination codon at position 1053, which is predicted to lead to a truncated or absent protein. Loss of function of the <i>BRCA2</i> gene is an established disease mechanism in autosomal dominant hereditary breast and ovarian cancer syndrome (HBOC). Additionally, this variant was classified as pathogenic on Apr 22, 2016 by the ClinGen-approved ENIGMA expert panel (ClinVar Variation ID: 37820). In summary, this variant meets criteria to be classified as pathogenic for autosomal dominant HBOC. ACMG/AMP Criteria applied: PVS1, PM2, PS4 Moderate.                                                                                                                                                                                                                                                                                                                                                                                                                                                                                                                     |
| <i>BRCA2</i><br>5 | 13:32911897:C>A        | p.Tyr1135X<br>Likely Pathogenic      | The p.Tyr1135X variant in <i>BRCA2</i> has been reported in one individual with prostate cancer (Kote-Jarai 2011). It was absent from large population studies. This variant has also been reported in ClinVar (Variation ID: 231604). This nonsense variant leads to a premature termination codon at position 1135, which is predicted to lead to a truncated or absent protein. Loss of function of the <i>BRCA2</i> gene is an established disease mechanism in autosomal dominant hereditary breast and ovarian cancer syndrome (HBOC). In summary, although additional studies are required to fully establish its clinical significance, this variant meets criteria to be classified as likely pathogenic for autosomal dominant HBOC. ACMG/AMP Criteria applied: PVS1, PM2.                                                                                                                                                                                                                                                                                                                                                                                                                                                                                                                                                                                                               |
| <i>BRCA2</i><br>5 | 13:32912338:TG><br>-   | p.Val1283LysfsX2<br>Pathogenic       | The p.Val1283LysfsX2 variant in <i>BRCA2</i> has been reported in >35 individuals with <i>BRCA2</i> -associated cancers (Wang 2012, Breast Cancer Information Core (BIC) database). This variant has also been identified in 11/112032 European chromosomes by the Genome Aggregation Database (GnomAD, <a href="http://gnomad.broadinstitute.org">http://gnomad.broadinstitute.org</a> ); however, this frequency is low enough to be consistent with the frequency of hereditary breast and ovarian cancer (HBOC) in the general population. This variant is predicted to cause a frameshift, which alters the protein's amino acid sequence beginning at position 1283 and leads to a premature termination codon 2 amino acids downstream. This alteration is then predicted to lead to a truncated or absent protein. Heterozygous loss of function of the <i>BRCA2</i> gene is an established disease mechanism for HBOC. In summary, this variant meets our criteria to be classified as pathogenic for HBOC in an autosomal dominant manner based upon the predicted impact to the protein. ACMG/AMP criteria applied: PVS1, PS4.                                                                                                                                                                                                                                                          |
| <i>BRCA2</i><br>5 | 13:32912965:GAA<br>A>- | p.Glu1493ValfsX10<br>Pathogenic      | The p.Glu1493ValfsX10 variant in <i>BRCA2</i> has been reported in >20 individuals with <i>BRCA2</i> -related cancers and segregated with disease in 12 individuals from one family (Tavtigian 1996, Kote-Jarai 2011, Zhang 2011, Maxwell 2016, Susswein 2016, Shi 2017, AlDubayan 2018, Dudley 2018, Mijuskovic 2018, BIC database). It has also been identified in 4/112994 European chromosomes by gnomAD ( <a href="http://gnomad.broadinstitute.org">http://gnomad.broadinstitute.org</a> ); however, this frequency is low enough to be consistent with the frequency of hereditary breast and ovarian cancer (HBOC) in the general population. This variant is predicted to cause a frameshift, which alters the protein's amino acid sequence beginning at position 1493 and leads to a premature termination codon 10 amino acids downstream. This alteration is then predicted to lead to a truncated or absent protein. Loss of function of the <i>BRCA2</i> gene is an established disease mechanism in autosomal dominant HBOC. Additionally, this variant was classified as Pathogenic on Apr 22 2016 by the ClinGen-approved ENIGMA expert panel (Variation ID: 51653). In summary, this variant meets criteria to be classified as pathogenic for autosomal dominant HBOC. ACMG/AMP Criteria applied: PVS1, PS4, PP1 Strong, PM2.                                                  |
| <i>BRCA2</i><br>5 | 13:32913795:TT>-       | p.Leu1768ArgfsX5<br>Pathogenic       | The p.Leu1768ArgfsX5 variant in <i>BRCA2</i> has been reported in at least 15 individuals with <i>BRCA2</i> -related cancers and segregated with disease in at least 1 individual from one family (Gayther 2000, Gutiérrez Espeleta 2012, Shindo 2017, Tea 2014, Alsop 2012, Lecarpentier 2012, Castro 2013, Kraus 2017, Mitra 2008, BIC database). It has also been identified in 1/113142 European chromosomes by gnomAD ( <a href="http://gnomad.broadinstitute.org">http://gnomad.broadinstitute.org</a> ); however, this frequency is low enough to be consistent with the frequency of hereditary breast and ovarian cancer (HBOC) in the general population. This variant is predicted to cause a frameshift, which alters the protein's amino acid sequence beginning at position 1768 and leads to a premature termination codon 5 amino acids downstream. This alteration is then predicted to lead to a truncated or absent protein. Loss of function of the <i>BRCA2</i> gene is an established disease mechanism in autosomal dominant hereditary breast and ovarian cancer syndrome (HBOC). Additionally, this variant was classified as Pathogenic on Sept 8 2016 by the ClinGen-approved ENIGMA expert panel (Variation ID: 37957). In summary, this variant meets criteria to be classified as pathogenic for autosomal dominant HBOC. ACMG/AMP Criteria applied: PVS1, PM2, PS4. |
| <i>BRCA2</i><br>5 | 13:32913837:AA><br>-   | p.Asn1784HisfsX2<br>Pathogenic       | The p.Asn1784HisfsX2 variant in <i>BRCA2</i> has been identified in >30 individuals with <i>BRCA2</i> -associated cancers (Gayther 1997, Walsh 2011, Zhang 2011, George 2013, Cunningham 2014, Breast Cancer Information Core (BIC) database, Sharing Clinical Reports Project). This variant has been identified in 1/15316 of European chromosomes by the Genome Aggregation Database (GnomAD, <a href="http://gnomad.broadinstitute.org">http://gnomad.broadinstitute.org</a> ); however, this frequency is low enough to be consistent with the frequency of hereditary breast and ovarian cancer (HBOC) in the general population. This variant is predicted to cause a frameshift, which alters the protein's amino acid sequence beginning at position 1784 and leads to a premature termination codon 2 amino acids downstream. This alteration is then predicted to lead to a truncated or absent protein. Heterozygous loss of function of the <i>BRCA2</i> gene is an established disease mechanism in individuals with hereditary breast and ovarian cancer (HBOC). In summary, this variant meets our criteria to be classified as pathogenic for HBOC in an autosomal dominant manner based upon the predicted impact to the protein. ACMG/AMP criteria applied: PVS1, PS4, PM2.                                                                                                     |

|                   |                  |                                 |                                                                                                                                                                                                                                                                                                                                                                                                                                                                                                                                                                                                                                                                                                                                                                                                                                                                                                                                                                                                                                                                                                                                                                                                                                                                                                                                                                                               |
|-------------------|------------------|---------------------------------|-----------------------------------------------------------------------------------------------------------------------------------------------------------------------------------------------------------------------------------------------------------------------------------------------------------------------------------------------------------------------------------------------------------------------------------------------------------------------------------------------------------------------------------------------------------------------------------------------------------------------------------------------------------------------------------------------------------------------------------------------------------------------------------------------------------------------------------------------------------------------------------------------------------------------------------------------------------------------------------------------------------------------------------------------------------------------------------------------------------------------------------------------------------------------------------------------------------------------------------------------------------------------------------------------------------------------------------------------------------------------------------------------|
| <i>BRCA2</i><br>5 | 13:32921004:T>-  | p.Leu2327X<br>Likely Pathogenic | The p.Leu2327X variant in <i>BRCA2</i> has not been previously reported in individuals with hereditary breast and/or ovarian cancer (HBOC) and was absent from large population studies, but has been reported in ClinVar (Variation ID: 252419). This nonsense variant leads to a premature termination codon at position 2327, which is predicted to lead to a truncated or absent protein. Loss of function of the <i>BRCA2</i> gene is an established disease mechanism in autosomal dominant HBOC. In summary, although additional studies are required to fully establish its clinical significance, this variant meets criteria to be classified as likely pathogenic for autosomal dominant HBOC. ACMG/AMP Criteria applied: PVS1, PM2.                                                                                                                                                                                                                                                                                                                                                                                                                                                                                                                                                                                                                                               |
| <i>BRCA2</i><br>6 | 13:32929058:TC>- | p.Leu2357ValfsX2<br>Pathogenic  | The p.Leu2357ValfsX2 variant in <i>BRCA2</i> has been identified in >30 individuals with <i>BRCA2</i> -associated cancers (Garvin 1997, Spearman 2008, Borg 2010, Caux-Moncoutier 2011, Zhang 2011, Breast Cancer Information Core (BIC) database). This variant has also been identified in 7/12892 European chromosomes by the Genome Aggregation Database (GnomAD, <a href="http://gnomad.broadinstitute.org">http://gnomad.broadinstitute.org</a> ); however, this frequency is low enough to be consistent with the frequency of hereditary breast and ovarian cancer (HBOC) in the general population. This variant is predicted to cause a frameshift, which alters the protein's amino acid sequence beginning at position 2357 and leads to a premature termination codon 2 amino acids downstream. This alteration is then predicted to lead to a truncated or absent protein. Heterozygous loss of function of the <i>BRCA2</i> gene is an established disease mechanism in individuals with HBOC. In addition, this variant was classified as Pathogenic on April 22, 2016 by the ClinGen-approved ENIGMA expert panel (ClinVar SCV000282439.1). In summary, this variant meets criteria to be classified as pathogenic for HBOC in an autosomal dominant manner based upon the predicted impact to the protein. ACMG/AMP Criteria applied: PVS1, PS4, PM2.                       |
| <i>LDLR</i><br>1  | 19:11210949:A>-  | p.Ile40SerfsX166<br>Pathogenic  | The p.Ile40SerfsX166 variant in <i>LDLR</i> has been identified in at least 3 individuals with hypercholesterolemia (Heath 1999, Martin 2016). It was absent from large population studies. This variant is predicted to cause a frameshift, which alters the protein's amino acid sequence beginning at position 40 and leads to a premature termination codon 166 amino acids downstream. This alteration is then predicted to lead to a truncated or absent protein. Loss of function of the <i>LDLR</i> gene is an established disease mechanism in autosomal dominant familial hypercholesterolemia. In summary, this variant meets criteria to be classified as pathogenic for autosomal dominant familial hypercholesterolemia. ACMG/AMP Criteria applied: PVS1, PM2, PS4 Supporting.                                                                                                                                                                                                                                                                                                                                                                                                                                                                                                                                                                                                  |
| <i>LDLR</i><br>1  | 19:11213360:G>-  | p.Asp72ThrfsX134<br>Pathogenic  | The p.Asp72ThrfsX134 variant in <i>LDLR</i> has been identified in at least 3 individuals with hypercholesterolemia and segregated with disease in >15 individuals from a large family (Ward 1996, Martin 2016, Defesche 2017). It has also been identified in 1/113766 European chromosomes by gnomAD ( <a href="https://gnomad.broadinstitute.org">https://gnomad.broadinstitute.org</a> ). This variant is predicted to cause a frameshift, which alters the protein's amino acid sequence beginning at position 72 and leads to a premature termination codon 134 amino acids downstream. This alteration is then predicted to lead to a truncated or absent protein. Loss of function of the <i>LDLR</i> gene is an established disease mechanism in autosomal dominant familial hypercholesterolemia. In summary, this variant meets criteria to be classified as pathogenic for autosomal dominant familial hypercholesterolemia. ACMG/AMP Criteria applied: PVS1, PP1 Strong, PM2, PS4 Supporting.                                                                                                                                                                                                                                                                                                                                                                                    |
| <i>LDLR</i><br>1  | 19:11213390:C>T  | p.Arg81Cys<br>Likely Pathogenic | The p.Arg81Cys variant in <i>LDLR</i> (also described as p.Arg81Cys in the literature) has been reported in >18 individuals with familial hypercholesterolemia (FH; Nissen 1998, Loubser 1999, Fouchier 2001, Bourbon 2008, Alonso 2009, Huijgen 2010, Huijgen 2011, Bertolini 2013), though not all individuals had extremely elevated LDL-cholesterol levels (Huijgen 2011). It has been suggested that the p.Arg81Cys variant results in an <i>LDLR</i> protein that does not function as effectively as that produced by the wild-type allele, thus resulting in only modest LDL-cholesterol elevations (Huijgen 2010). This variant has also been reported by other clinical laboratories in ClinVar (Variation ID: 183083) and has been identified in 2/111718 European chromosomes by the Genome Aggregation Database (gnomAD, <a href="http://gnomad.broadinstitute.org">http://gnomad.broadinstitute.org</a> ; dbSNP rs730882078). This frequency is low enough to be consistent with the frequency of FH in the general population. Computational prediction tools and conservation analysis do not provide strong support for or against an impact to the protein. In summary, although additional studies are required to fully establish its clinical significance, the p.Arg81Cys variant is likely pathogenic. The ACMG/AMP Criteria applied (Richards 2015): PS4 Strong, PM2. |
| <i>LDLR</i><br>1  | 19:11213462:CG>- | c.313_313+1delCG<br>Pathogenic  | The c.313_313+1delCG variant in <i>LDLR</i> has been reported in 2 individuals with hypercholesterolemia (Hobbs 1992, Hooper 2012). It was absent from large population studies. This variant occurs within the canonical splice site (+/- 1,2) and is predicted to cause altered splicing leading to an abnormal or absent protein. An in vitro study supports an impact on splicing (Hobbs 1992). Loss of function of the <i>LDLR</i> gene is an established disease mechanism in autosomal dominant familial hypercholesterolemia. In summary, this variant meets criteria to be classified as pathogenic for autosomal dominant familial hypercholesterolemia. ACMG/AMP Criteria applied: PVS1, PM2, PS4 Supporting.                                                                                                                                                                                                                                                                                                                                                                                                                                                                                                                                                                                                                                                                      |
| <i>LDLR</i><br>1  | 19:11213463:G>A  | c.313+1G>A<br>Pathogenic        | The c.313+1G>A variant in <i>LDLR</i> has been reported in >140 individuals with familial hypercholesterolemia (FH) and segregated with disease in at least 5 affected relatives from 2 families (Leren 1994, Sun 1995, Lombardi 2000, Hooper 2012). This variant has also been identified in 7/111670 European chromosomes by gnomAD ( <a href="http://gnomad.broadinstitute.org">http://gnomad.broadinstitute.org</a> ). This frequency is low enough to be consistent with the frequency of FH in the general population. The c.313+1G>A variant occurs in the invariant region (+/- 1,2) of the splice consensus sequence and is predicted to cause altered splicing that would preserve the protein reading frame, leading to an abnormal protein. Furthermore, in vitro functional studies provide some evidence that this variant may impact protein function (Sun 1995, Cameron 2009). In summary, this variant meets criteria to be classified as pathogenic for FH in an autosomal dominant manner based upon presence in multiple affected individuals, segregation studies, low frequency in the general population, and impact to the protein. The ACMG/AMP Criteria applied: PS4, PM2, PP1 Moderate, PVS1 Moderate.                                                                                                                                                             |
| <i>LDLR</i><br>1  | 19:11213463:G>C  | c.313+1G>C<br>Pathogenic        | The c.313+1G>C variant in <i>LDLR</i> has been identified in >80 Spanish individuals with familial hypercholesterolemia (FH; Tejedor 2011). It has also been identified in 1/113710 European chromosomes by gnomAD ( <a href="https://gnomad.broadinstitute.org">https://gnomad.broadinstitute.org</a> ). This variant occurs in the invariant region (+/- 1,2) of the splice consensus sequence and is predicted to cause altered splicing leading to an abnormal or absent protein.                                                                                                                                                                                                                                                                                                                                                                                                                                                                                                                                                                                                                                                                                                                                                                                                                                                                                                         |

|                  |                 |                                  |                                                                                                                                                                                                                                                                                                                                                                                                                                                                                                                                                                                                                                                                                                                                                                                                                                                                                                                                                                                                                                                                                                                                                                                                                                                                                                                                                                                                                                                                                                                                                                                                                                         |
|------------------|-----------------|----------------------------------|-----------------------------------------------------------------------------------------------------------------------------------------------------------------------------------------------------------------------------------------------------------------------------------------------------------------------------------------------------------------------------------------------------------------------------------------------------------------------------------------------------------------------------------------------------------------------------------------------------------------------------------------------------------------------------------------------------------------------------------------------------------------------------------------------------------------------------------------------------------------------------------------------------------------------------------------------------------------------------------------------------------------------------------------------------------------------------------------------------------------------------------------------------------------------------------------------------------------------------------------------------------------------------------------------------------------------------------------------------------------------------------------------------------------------------------------------------------------------------------------------------------------------------------------------------------------------------------------------------------------------------------------|
|                  |                 |                                  | Heterozygous loss of <i>LDLR</i> function is an established disease mechanism in FH. In summary, this variant meets our criteria to be classified as pathogenic for FH in an autosomal dominant manner. PVS1 Strong, PS4, PM2.                                                                                                                                                                                                                                                                                                                                                                                                                                                                                                                                                                                                                                                                                                                                                                                                                                                                                                                                                                                                                                                                                                                                                                                                                                                                                                                                                                                                          |
| <i>LDLR</i><br>1 | 19:11216083:C>A | p.Cys167X<br>Pathogenic          | The p.Cys167X variant in <i>LDLR</i> (also described as p.Cys146X in the literature) has been reported in the heterozygous state in >10 individuals with familial hypercholesterolemia (FH), segregated with disease in one affected relative from one family (Lombardi 1995, Heath 1999, Fouchier 2001, Bodamer 2002, van der Graaf 2011, Tichy 2012, Sharifi 2016) and was absent from large population studies. Additionally, this variant has been reported by other clinical laboratories in ClinVar (Variation ID: 200918). This nonsense variant leads to a premature termination codon at position 167, which is predicted to lead to a truncated or absent protein. Heterozygous loss of function of the <i>LDLR</i> gene is an established disease mechanism in FH. In summary, this variant meets our criteria to be classified as pathogenic for familial hypercholesterolemia in an autosomal dominant manner based upon predicted impact to the protein, presence in multiple affected individuals and absence in the general population. ACMG/AMP Criteria applied (Richards 2015): PVS1, PS4 Moderate, PM2.                                                                                                                                                                                                                                                                                                                                                                                                                                                                                                             |
| <i>LDLR</i><br>1 | 19:11216263:C>G | p.Asp227Glu<br>Pathogenic        | The p.Asp227Glu variant in <i>LDLR</i> (also known as the FH Afrikaner 1 allele) is a founder variant in the Afrikan population and is thought to account for 65 - 75% of familial hypercholesterolemia in Afrikans (Leitersdorf 1989, Kotze 1990, Kotze 1994). This variant has also been identified in at least 7 Caucasian individuals with familial hypercholesterolemia (Gudnason 1993, Callis 1998, Fouchier 2001, Bertolini 2013, Sharifi 2016) and has been reported in ClinVar (Variation ID 3690). Additionally, in vitro functional studies provide some evidence that the p.Asp227Glu variant may impair receptor activity (Fourie 1988). This variant has been identified in 1/33548 Latino chromosomes by the Genome Aggregation Database (gnomAD; <a href="http://gnomad.broadinstitute.org">http://gnomad.broadinstitute.org</a> ; dbSNP rs121908028). This frequency is low enough to be consistent with the frequency of familial hypercholesterolemia (FH) in the general population. In summary, this variant meets criteria to be classified as pathogenic for FH in an autosomal dominant manner based upon low frequency in controls, functional evidence, and presence in multiple affected individuals. ACMG/AMP Criteria applied: PS4, PP1 Strong, PM2, PP3, PS3 Supporting.                                                                                                                                                                                                                                                                                                                                  |
| <i>LDLR</i><br>1 | 19:11216264:G>T | p.Glu228X<br>Pathogenic          | The p.Glu228X variant in <i>LDLR</i> (also described as p.Glu207X in the literature) has been reported in 23 individuals with familial hypercholesterolemia (FH; Hobbs 1992, Nauck 2001, Bodamer 2002, Kim 2004, Taylor 2007, Hola 2009, Vandrovцова 2013, Han 2015, Du 2016, Abul-Husn 2016) and segregated with disease in 6 affected relatives from 3 families (Bodamer 2002, Kim 2004). This variant has also been reported by other clinical laboratories in ClinVar (Variation ID 226333). In vitro functional studies provide some evidence that the p.Glu228X variant may impact protein function (Hobbs 1992, Holla 2009). This variant has also been identified in 1/23818 African and 2/125438 European chromosomes by the Genome Aggregation Database (gnomAD, <a href="http://gnomad.broadinstitute.org">http://gnomad.broadinstitute.org</a> ; dbSNP rs12190829). This frequency is low enough to be consistent with the frequency of FH in the general population. This nonsense variant leads to a premature termination codon at position 228, which is predicted to lead to a truncated or absent protein. Heterozygous loss of function of the <i>LDLR</i> gene is an established disease mechanism in individuals with FH. In summary, this variant meets criteria to be classified as pathogenic for FH in an autosomal dominant manner based upon presence in multiple affected individuals, segregation studies, low frequency in the general population, predicted impact on the protein, and functional evidence. The ACMG/AMP criteria applied (Richards 2015): PVS1; PM2; PS4; PP1 Moderate; PS3 Supporting. |
| <i>LDLR</i><br>1 | 19:11217344:T>A | p.Asp266Glu<br>Pathogenic        | The p.Asp266Glu variant has been reported in over 100 individuals with familial hypercholesterolemia (FH; Bertolini 2013, Brønne 2015, Brusgaard 2006, Chmara 2010, Do 2015, Fouchier 2001, Hobbs 1992, Schmidt 2000, Sharifi 2016, Tichy 2012, Weiss 2000). Some publications refer to this variant as p.Asp245Glu (or p.D266E). This variant has also been reported by other clinical laboratories in ClinVar (Variation ID: 161287) and has been identified in 10/126728 European chromosomes by the Genome Aggregation Database (GnomAD, <a href="http://gnomad.broadinstitute.org">http://gnomad.broadinstitute.org</a> ; dbSNP rs139043155). In vitro functional studies provide some evidence that the p.Asp266Glu variant may impact protein function, resulting in 15-30% LDL receptor activity (Hobbs 1992). Computational prediction tools and conservation analysis suggest that the p.Asp266Glu variant may impact the protein. Another likely pathogenic missense change at the same position (p.Asp266Tyr) has been reported in association to FH (reported as p.Asp245Tyr, Weiss 2000). In summary, this variant meets criteria to be classified as pathogenic for familial hypercholesterolemia in an autosomal dominant manner based upon presence in a large number of affected individuals, low frequency in controls, presence of another pathogenic missense change at the same amino acid position, functional evidence and computational evidence. ACMG/AMP Criteria applied: PS4, PM2, PM5, PP3, PS3 supporting (Richards 2015).                                                                               |
| <i>LDLR</i><br>1 | 19:11218112:G>A | p.Glu288Lys<br>Likely Pathogenic | The p.Glu288Lys variant in <i>LDLR</i> has been reported in >25 individuals with familial hypercholesterolemia and segregated with disease in 1 affected relative (Ebhardt 1999, Fouchier 2001, Bunn 2002, Bourbon 2008, Alonso 2009, Etxebarria 2012, Bertolini 2013, ArulJothi 2016). Additionally, this variant has been identified in 6/30782 South Asian chromosomes by the Genome Aggregation Database (gnomAD, <a href="http://gnomad.broadinstitute.org">http://gnomad.broadinstitute.org</a> ; dbSNP rs368657165) and is present in ClinVar (Variation ID: 161268). Please note that for diseases with clinical variability, reduced penetrance, or recessive inheritance, pathogenic variants may be present at a low frequency in the general population. In vitro functional studies provide some evidence that the p.Glu288Lys variant may impact protein function (Etxebarria 2012). However, these types of assays may not accurately represent biological function. Computational prediction tools and conservation analysis do not provide strong support for or against an impact to the protein. In summary, although additional studies are required to fully establish its clinical significance, the p.Glu288Lys variant is likely pathogenic. The ACMG/AMP Criteria applied: PS4, PM2 Supporting, PS3 Supporting.                                                                                                                                                                                                                                                                                                |
| <i>LDLR</i><br>1 | 19:11218162:C>G | p.Asp304Glu<br>Likely Pathogenic | The p.Asp304Glu variant in <i>LDLR</i> has been reported in at least 3 individuals with familial hypercholesterolemia, two of which were compound heterozygotes (FH; Hobbs 1992, Tosi 2007, Webb 1996). It has also been reported by other clinical laboratories in ClinVar (Variation ID 226336) and is absent from large population studies. In vitro functional studies have shown that cultured fibroblasts from compound heterozygous carriers of the p.Asp304Glu variant have reduced <i>LDLR</i> activity (2-5% with c.2309-?_*2514+?del and 25-30% with p.Asp96Gly; Hobbs 1992, Webb 1996). In addition, other disease-causing variants (p.Asp304Asn, p.Asp304Tyr) at this position have been reported in individuals with FH (Hobbs 1992, Do 2015, Loux 1992, Thormahlen 2015, Tichy 2012, Vohnout 2016), suggesting changes at this position are                                                                                                                                                                                                                                                                                                                                                                                                                                                                                                                                                                                                                                                                                                                                                                              |



|           |                 |                                  |                                                                                                                                                                                                                                                                                                                                                                                                                                                                                                                                                                                                                                                                                                                                                                                                                                                                                                                                                                                                                                                                                                                                                                                                                                                                                                                                                                                                                                                                                                                              |
|-----------|-----------------|----------------------------------|------------------------------------------------------------------------------------------------------------------------------------------------------------------------------------------------------------------------------------------------------------------------------------------------------------------------------------------------------------------------------------------------------------------------------------------------------------------------------------------------------------------------------------------------------------------------------------------------------------------------------------------------------------------------------------------------------------------------------------------------------------------------------------------------------------------------------------------------------------------------------------------------------------------------------------------------------------------------------------------------------------------------------------------------------------------------------------------------------------------------------------------------------------------------------------------------------------------------------------------------------------------------------------------------------------------------------------------------------------------------------------------------------------------------------------------------------------------------------------------------------------------------------|
|           |                 |                                  | not tolerated. In summary, although additional studies are required to fully establish its clinical significance, the p.Asp304Glu variant is likely pathogenic. ACMG/AMP Criteria applied: PM2, PM5, PS3 Moderate, PS4 Supporting (Richards 2015).                                                                                                                                                                                                                                                                                                                                                                                                                                                                                                                                                                                                                                                                                                                                                                                                                                                                                                                                                                                                                                                                                                                                                                                                                                                                           |
| LDLR<br>1 | 19:11222190:A>G | p.Asp354Gly<br>Likely Pathogenic | The p.Asp354Gly variant in <i>LDLR</i> (also described as p.Asp333Gly in the literature) has been reported in the compound heterozygous state in one individual with familial hypercholesterolemia (FH) who had a second pathogenic variant in <i>LDLR</i> (Hobbs 1992) and in the heterozygous state in at least 6 individuals with FH (Hobbs 1992, Fouchier 2001, Chmara 2010, Pek 2017, ClinVar: Variation ID 251639). In vitro functional studies provide some evidence that the p.Asp354Gly variant may impact protein function (Hobbs 1992). This variant has also been identified in 1/30782 South Asian chromosomes by the Genome Aggregation Database (gnomAD, <a href="http://gnomad.broadinstitute.org/">http://gnomad.broadinstitute.org/</a> ); dbSNP rs755449669). This frequency is low enough to be consistent with the frequency of FH in the general population. This variant is located in the first base of the exon, which is part of the 3' splice region. Computational prediction tools and conservation analysis suggest an impact both the protein and splicing. In summary, although additional studies are required to fully establish its clinical significance, the p.Asp354Gly variant is likely pathogenic. The ACMG/AMP Criteria applied: PM2; PP3; PS3 Supporting; PS4 Moderate.                                                                                                                                                                                                           |
| LDLR<br>1 | 19:11223944:G>A | c.1187-10G>A<br>Pathogenic       | The c.1187-10G>A variant in <i>LDLR</i> has been reported in 10 heterozygous individuals and 1 homozygous individual with hypercholesterolemia and segregated with disease in 10 affected individuals from 2 families (Wang 2011, Amsellem 2002, Punzalan 2005, Chmara 2010, Sun 2015, Liang 2016). It has also been identified in 0.005% (1/18364) of East Asian chromosomes by gnomAD ( <a href="http://gnomad.broadinstitute.org/">http://gnomad.broadinstitute.org/</a> ) and is reported in ClinVar (Variation ID: 226349). This variant is located in the 3' splice region. Computational prediction tools and in vitro splicing assays are consistent with pathogenicity (Holla 2009). In vitro functional studies support an impact on protein function (Holla 2009, Romano 2011). In summary, this variant meets criteria to be classified as pathogenic for autosomal dominant hypercholesterolemia. ACMG/AMP Criteria applied: PP1 Strong, PM3, PS3 Moderate, PS4 Moderate.                                                                                                                                                                                                                                                                                                                                                                                                                                                                                                                                       |
| LDLR<br>1 | 19:11223983:C>T | p.Arg406Trp<br>Pathogenic        | The p.Arg406Trp variant in <i>LDLR</i> has been reported in >15 individuals with hypercholesterolemia and segregated with disease in >30 affected relatives from multiple families (Reshef 1996, Bourbon 2008, Chiou 2010, Shin 2015, Jannes 2015, Medeiros 2014, Medeiros 2015, and Benito-Vicente 2015, ClinVar submission accessions: SCV000503317.1, SCV000268604.1). It has been also identified in 2/24010 African chromosomes by the Genome Aggregation Database (gnomAD, <a href="http://gnomad.broadinstitute.org/">http://gnomad.broadinstitute.org/</a> ). In vitro functional studies provide some evidence that the p.Arg406Trp variant diminishes the protein activity by ~40%, suggesting that it may be a milder variant (Benito-Vicente 2015) which is consistent with the milder than expected phenotype seen in a homozygote (Medeiros 2015). Computational prediction tools and conservation analysis suggest that the p.Arg406Trp variant may impact the protein. In summary, this variant meets criteria to be classified as pathogenic for familial hypercholesterolemia in an autosomal dominant manner. The ACMG/AMP Criteria applied: PP1 Strong, PS3 Supporting, PS4, PM2 Supporting, PP3.                                                                                                                                                                                                                                                                                                        |
| LDLR<br>1 | 19:11223989:G>A | p.Glu408Lys<br>Likely Pathogenic | The p.Glu408Lys variant in <i>LDLR</i> (also described as p.Glu387Lys in the literature), has been reported in one individual with early myocardial infarction (Do 2015) and at least 7 individuals with familial hypercholesterolemia (FH), including at least 3 heterozygotes, 3 homozygotes and 1 compound heterozygote with a second pathogenic variant in the <i>LDLR</i> gene (Hobbs 1992, Dedoussis 2004, Widhalm 2007, Taylor 2010). Other clinical laboratories have also reported this variant in ClinVar (Variation ID 36453). In vitro functional studies provide some evidence that the p.Glu408Lys variant may impact ligand recycling as it failed to release ligands in the endosome (Hobbs 1992, Strom 2011). This variant has also been identified in 2/111530 European chromosomes by the Genome Aggregation Database (GnomAD, <a href="http://gnomad.broadinstitute.org/">http://gnomad.broadinstitute.org/</a> ); dbSNP rs137943601). This frequency is low enough to be consistent with the frequency of FH in the general population. Additionally, other amino acid changes at this position have been reported in individuals with FH (Palcoux 2008, Duscova 2011), suggesting that changes at this position may not be tolerated. In summary, although additional studies are required to fully establish its clinical significance, the p.Glu408Lys variant is likely pathogenic. ACMG/AMP Criteria applied: PS4 moderate, PM2, PS3 supporting, PM5 supporting (Richards 2015).                   |
| LDLR<br>1 | 19:11224052:G>A | p.Val429Met<br>Pathogenic        | The p.Val429Met variant in <i>LDLR</i> has been identified in over 25 individuals with familial hypercholesterolemia (FH); including in 2 homozygotes and 3 compound heterozygotes with a known pathogenic variant) and segregated with disease in over 100 affected relatives from at least 1 family (Leitersdorf 1989, Dedoussis 2004, Versmissen 2011). Additionally, this variant was also identified in at least 1 family (of 2 affected sibs) with premature myocardial infarction (MI; Braenne 2015). The p.Val429Met variant has been reported by other clinical laboratories in ClinVar (Variation ID: 3694) and has also been identified in 0.001% (3/251284) of pan-ethnic chromosomes by gnomAD ( <a href="http://gnomad.broadinstitute.org/">http://gnomad.broadinstitute.org/</a> ). This frequency is low enough to be consistent with the frequency of FH in the general population. Computational prediction tools and conservation analysis do not provide strong support for or against an impact to the protein. In vitro functional studies support an impact on protein function (Leitersdorf 1989). In summary, this variant meets criteria to be classified as pathogenic for autosomal dominant FH. ACMG/AMP Criteria applied: PS4, PP1 Strong, PM2, PS3 Supporting.                                                                                                                                                                                                                                |
| LDLR<br>1 | 19:11224326:G>A | p.Asp492Asn<br>Likely Pathogenic | The p.Asp492Asn variant in <i>LDLR</i> has been reported in >15 individuals across diverse populations with hypercholesterolemia (Mak 1998, Descamps 2001, Amsellem 2002, Damgaard 2005, Taylor 2007, Alonso 2009, Guardamagno 2009, Chiou 2010, Tichy 2012). In vitro functional studies provide some evidence that the p.Asp492Asn variant may not impact protein function (Thormaehehn 2015). However, these types of assays may not accurately represent biological function. This variant has been identified in 2/17248 East Asian chromosomes by the Genome Aggregation Database (gnomAD, <a href="http://gnomad.broadinstitute.org/">http://gnomad.broadinstitute.org/</a> ); dbSNP rs373646964) and is reported in ClinVar (Variation ID: 251864). However, this frequency is not inconsistent for diseases with clinical variability, reduced penetrance, or recessive inheritance, pathogenic variants may be present at a low frequency in the general population. Computational prediction tools and conservation analysis suggest that the p.Asp492Asn variant may impact the protein. Two other variants at the same amino acid residue have been identified in patients with hypercholesterolemia (p.Asp492Gly and p.Asp492His), suggesting that variation in this position may not be tolerated. In summary, although additional studies are required to fully establish its clinical significance, the p.Asp492Asn variant is likely pathogenic. ACMG/AMP Criteria applied: PS4; PM2; PM5 Supporting; PP3. |

|                  |                 |                                  |                                                                                                                                                                                                                                                                                                                                                                                                                                                                                                                                                                                                                                                                                                                                                                                                                                                                                                                                                                                                                                                                                                                                                                                                                                                                                                                                                                                                        |
|------------------|-----------------|----------------------------------|--------------------------------------------------------------------------------------------------------------------------------------------------------------------------------------------------------------------------------------------------------------------------------------------------------------------------------------------------------------------------------------------------------------------------------------------------------------------------------------------------------------------------------------------------------------------------------------------------------------------------------------------------------------------------------------------------------------------------------------------------------------------------------------------------------------------------------------------------------------------------------------------------------------------------------------------------------------------------------------------------------------------------------------------------------------------------------------------------------------------------------------------------------------------------------------------------------------------------------------------------------------------------------------------------------------------------------------------------------------------------------------------------------|
| <i>LDLR</i><br>1 | 19:11224419:G>A | p.Val523Met<br>Pathogenic        | The p.Val523Met variant in <i>LDLR</i> (also referred as p.Val502Met, FH Kuwait, and FH Bari-2) has been reported in >100 heterozygous individuals with hypercholesterolemia as well as in at least 3 homozygous individuals and 3 compound heterozygous individuals with homozygous familial hypercholesterolemia (Hobbs 1990, Tichy 2012, Bertolini 2013, Wang 2016, Sánchez-Hernández 2016, Pirillo 2017). This variant also segregated with homozygous familial hypercholesterolemia in 1 homozygous relative (Bertolini 2013). In vitro functional studies provide some evidence that the heterozygous p.Val523Met variant may impact protein function (Romano 2011). It has been reported in ClinVar (Variation ID: 3696) and has also been identified in 1/30782 South Asian and 2/111654 European chromosomes by the Genome Aggregation Database (gnomAD, <a href="http://gnomad.broadinstitute.org">http://gnomad.broadinstitute.org</a> ; dbSNP rs28942080). In summary, this variant meets criteria to be classified as pathogenic for familial hypercholesterolemia in an autosomal dominant manner based upon proband count, absence from controls, and functional studies. The ACMG/AMP Criteria applied: PS4, PM2, PS3 Supporting, PM3 Strong.                                                                                                                                          |
| <i>LDLR</i><br>1 | 19:11226816:G>- | p.Gly546AlafsX2<br>Pathogenic    | The p.Gly546AlafsX2 variant in <i>LDLR</i> has been reported in 2 individuals with hypercholesterolemia and segregated with disease in 3 affected family members (Marduel 2010). It was absent from large population studies. This variant is predicted to cause a frameshift, which alters the protein's amino acid sequence beginning at position 546 and leads to a premature termination codon 2 amino acids downstream. This alteration is then predicted to lead to a truncated or absent protein. Loss of function of the <i>LDLR</i> gene is an established disease mechanism in autosomal dominant familial hypercholesterolemia. In summary, this variant meets criteria to be classified as pathogenic for autosomal dominant familial hypercholesterolemia. ACMG/AMP Criteria applied: PVS1, PM2, PPI, PS4 Supporting.                                                                                                                                                                                                                                                                                                                                                                                                                                                                                                                                                                     |
| <i>LDLR</i><br>1 | 19:11226820:G>T | p.Gly546Val<br>Likely Pathogenic | The p.Gly546Val variant in <i>LDLR</i> has been reported in 5 individuals with hypercholesterolemia (Koeijvoets 2005, Taylor 2007, Vaca 2011). It was absent from large population studies. Computational prediction tools and conservation analyses suggest that this variant may impact the protein, though this information is not predictive enough to determine pathogenicity. Another variant, p.Gly546Asp, involving this codon has also been identified in individuals with hypercholesterolemia. In summary, although additional studies are required to fully establish its clinical significance, this variant meets criteria to be classified as likely pathogenic for autosomal dominant familial hypercholesterolemia. ACMG/AMP Criteria applied: PM2, PM5, PP3, PS4 Supporting.                                                                                                                                                                                                                                                                                                                                                                                                                                                                                                                                                                                                         |
| <i>LDLR</i><br>1 | 19:11227576:C>T | p.His583Tyr<br>Pathogenic        | The p.His583Tyr variant in <i>LDLR</i> (also reported as p.His562Tyr in the literature) has been reported in at least 18 individuals with familial hypercholesterolemia (FH): 15 in the heterozygous state and 3 in the compound heterozygous state. It segregated with disease in 9 affected relatives from 3 families (Sun 1994, Punzalan 2005, Chiou 2012, Yao 2012, Ma 2017). Compound heterozygotes were more severely affected than heterozygotes in the same families. This variant has also been reported by other clinical laboratories in ClinVar (Variation ID: 200921) and has been identified in 0.13% (24/18868) of East Asian chromosomes by gnomAD ( <a href="http://gnomad.broadinstitute.org">http://gnomad.broadinstitute.org</a> ). This frequency is low enough to be consistent with the frequency of FH in the general population. In vitro functional studies provide some evidence that the p.His583Tyr variant may impact protein processing (Sun 1994). Computational prediction tools and conservation analysis do not provide strong support for or against an impact to the protein. In summary, this variant meets criteria to be classified as pathogenic for FH in an autosomal dominant manner based upon occurrences in multiple affected individuals, segregation studies and functional evidence. The ACMG/AMP Criteria applied: PS4; PPI Strong; PS3 Supporting. |
| <i>LDLR</i><br>1 | 19:11227612:C>T | p.Arg595Trp<br>Pathogenic        | The p.Arg595Trp variant in <i>LDLR</i> has been reported in at least 15 individuals with dominant or recessive familial hypercholesterolemia (Alonso 2016, Bañares 2017, Chiou 2011, Damgaard 2005, Descamps 2001, Fouchier 2005, Jannes 2015, Junyent 2010, Mozas 2004, Pek 2017, Pirillo 2017, Sánchez-Hernández 2016). It has also been identified in 2/129168 European chromosomes by gnomAD ( <a href="http://gnomad.broadinstitute.org">http://gnomad.broadinstitute.org</a> ) and has also been reported in ClinVar (Variation ID: 161290). Computational prediction tools and conservation analysis suggest that this variant may impact the protein, though this information is not predictive enough to determine pathogenicity. Two other variants at this codon have been reported in individuals with familial hypercholesterolemia (Stenson 2017). In summary, this variant meets criteria to be classified as pathogenic for autosomal dominant familial hypercholesterolemia. ACMG/AMP Criteria applied: PM3 VeryStrong, PS4, PM2, PP3.                                                                                                                                                                                                                                                                                                                                                |
| <i>LDLR</i><br>1 | 19:11230820:G>A | p.Arg633His<br>Likely Pathogenic | The p.Arg633His variant in <i>LDLR</i> (also described as p.Arg612His in the literature) has been reported in 7 individuals with familial hypercholesterolemia (FH), including 2 compound heterozygotes (Fouchier 2005, Damgaard 2005, Huijgen 2012, Alonso 2016, ClinVar submission accession: SCV000583907.1, SCV000268649.1). It has also been reported by other clinical laboratories in ClinVar (Variation ID: 226380) and has been identified in 0.002% (6/282886) of pan-ethnic chromosomes by gnomAD ( <a href="http://gnomad.broadinstitute.org">http://gnomad.broadinstitute.org</a> ). This frequency is low enough to be consistent with the frequency of FH in the general population. Computational prediction tools and conservation analyses are consistent with pathogenicity. Another variant involving this codon (p.Arg633Cys) has been identified in individuals with FH and is classified as likely pathogenic by this laboratory, suggesting change at this position may not be tolerated. In summary, although additional studies are required to fully establish its clinical significance, this variant meets criteria to be classified as likely pathogenic for autosomal dominant FH. ACMG/AMP Criteria applied: PM2, PM5 Supporting, PP3, PS4 Moderate.                                                                                                                   |
| <i>LDLR</i><br>1 | 19:11231087:T>C | p.Cys677Arg<br>Likely Pathogenic | The p.Cys677Arg variant in <i>LDLR</i> has been reported in at least 7 individuals with hypercholesterolemia and segregated with disease in 6 affected individuals from 1 family (Hobbs 1992, Heath 1999, Humphries 2006, Bima 2009, Hooper 2012, Martin 2016, Wang 2016). It has also been identified in 1/113610 of European chromosomes by gnomAD ( <a href="http://gnomad.broadinstitute.org">http://gnomad.broadinstitute.org</a> ) and has been reported in ClinVar (Variation ID 226384). An in vitro functional study and computational prediction tools support an impact on protein function (Hobbs 1992). In summary, although additional studies are required to fully establish its clinical significance, this variant meets criteria to be classified as likely pathogenic for autosomal dominant familial . ACMG/AMP Criteria applied: PM2, PS4 Moderate, PPI Moderate, PP3, PS3 Supporting.                                                                                                                                                                                                                                                                                                                                                                                                                                                                                           |
| <i>LDLR</i><br>1 | 19:11231095:T>A | p.Tyr679X<br>Likely Pathogenic   | The p.Tyr679X variant in <i>LDLR</i> has been reported in 1 individual with hypercholesterolemia (Taylor 2007). It was absent from large population studies. This nonsense variant leads to a premature termination codon at position 679, which is predicted to lead to a truncated or absent protein. Loss of function of the <i>LDLR</i> gene is an established disease mechanism in autosomal dominant familial hypercholesterolemia. In summary,                                                                                                                                                                                                                                                                                                                                                                                                                                                                                                                                                                                                                                                                                                                                                                                                                                                                                                                                                  |

|                  |                       |                                  |                                                                                                                                                                                                                                                                                                                                                                                                                                                                                                                                                                                                                                                                                                                                                                                                                                                                                                                                                                                                                                                                                                                                                                                                                                                                                                                                                                                                                                          |
|------------------|-----------------------|----------------------------------|------------------------------------------------------------------------------------------------------------------------------------------------------------------------------------------------------------------------------------------------------------------------------------------------------------------------------------------------------------------------------------------------------------------------------------------------------------------------------------------------------------------------------------------------------------------------------------------------------------------------------------------------------------------------------------------------------------------------------------------------------------------------------------------------------------------------------------------------------------------------------------------------------------------------------------------------------------------------------------------------------------------------------------------------------------------------------------------------------------------------------------------------------------------------------------------------------------------------------------------------------------------------------------------------------------------------------------------------------------------------------------------------------------------------------------------|
|                  |                       |                                  | although additional studies are required to fully establish its clinical significance, this variant meets criteria to be classified as likely pathogenic for autosomal dominant familial hypercholesterolemia. ACMG/AMP Criteria applied: PVS1, PM2.                                                                                                                                                                                                                                                                                                                                                                                                                                                                                                                                                                                                                                                                                                                                                                                                                                                                                                                                                                                                                                                                                                                                                                                     |
| <i>LDLR</i><br>1 | 19:11231118:->C       | p.Asn688GlnfsX29<br>Pathogenic   | The p.Asn688GlnfsX29 variant in <i>LDLR</i> has been identified in at least 10 individuals with hypercholesterolemia (Graham 2005, Humphries 2006, Hooper 2012, Vandrovicova 2013, Johnston 2015, Abul-Husn 2016, Martin 2016) and has also been reported in ClinVar (Variation ID: 68103). It has been identified in 1/113654 European chromosomes by gnomAD ( <a href="http://gnomad.broadinstitute.org">http://gnomad.broadinstitute.org</a> ). This variant is predicted to cause a frameshift, which alters the protein's amino acid sequence beginning at position 688 and leads to a premature termination codon 29 amino acids downstream. This alteration is then predicted to lead to a truncated or absent protein. Heterozygous loss of function of the <i>LDLR</i> gene is an established disease mechanism in familial hypercholesterolemia. In summary, this variant meets criteria to be classified as pathogenic. ACMG/AMP Criteria applied: PVS1, PS4 Moderate, PM2.                                                                                                                                                                                                                                                                                                                                                                                                                                                   |
| <i>LDLR</i><br>2 | 19:11213408:T>G       | p.Trp87Gly<br>Pathogenic         | The p.Trp87Gly variant in <i>LDLR</i> is a well-established pathogenic variant for familial hypercholesterolemia (Leitersdorf 1990, Jensen 1996, Vohl 1997, Tybjaerg-Hansen 2005, Futema 2013), and is a known founder mutation in the French Canadian population where it has been reported in >400 individuals with FH, including >15 homozygous individuals (Vohl 1997). It has also been identified in 5/66740 European chromosomes by the Exome Aggregation Consortium (ExAC, <a href="http://exac.broadinstitute.org">http://exac.broadinstitute.org</a> ; dbSNP rs121908025); however, this frequency is low enough to be consistent with the frequency of FH in the general population. Additionally, in vitro functional studies provide some evidence that the p.Trp87Gly variant may impact protein function (Leitersdorf 1990). In summary, this variant meets our criteria to be classified as pathogenic for FH in an autosomal dominant manner based upon its identification in a large number of affected individuals and low frequency in controls.                                                                                                                                                                                                                                                                                                                                                                     |
| <i>LDLR</i><br>2 | 19:11213415:G>A       | p.Cys89Tyr<br>Likely Pathogenic  | The p.Cys89Tyr variant in <i>LDLR</i> has been reported in the heterozygous state in 7 individuals with hypercholesterolemia and segregated with disease in 1 affected individual (Day 1997, Graham 1999, Fouchier 2005, Humphries 2006, Tosi 2010, Wald 2016). It was also identified in the compound heterozygous state with a deletion of exons 16 and 17 in a child with a severe presentation. His father carried the p.Cys89Tyr variant and also had hypercholesterolemia (Tosi 2007). It was absent from large population studies. Computational prediction tools and conservation analyses suggest that this variant may impact the protein, though this information is not predictive enough to determine pathogenicity. Additional variants involving this codon (p.Cys89Trp, p.Cys89Arg, and p.Cys89Gly) have been identified in individuals with hypercholesterolemia. In summary, although additional studies are required to fully establish its clinical significance, this variant meets criteria to be classified as likely pathogenic for autosomal dominant familial hypercholesterolemia. ACMG/AMP Criteria applied: PM2, PM3, PS4 Moderate, PP3.                                                                                                                                                                                                                                                                    |
| <i>LDLR</i><br>2 | 19:11216233:TGG<br>>- | p.Gly219del<br>Pathogenic        | The p.Gly219del variant in <i>LDLR</i> (also known as FH Lithuania and G197del) has been reported in >75 families with hypercholesterolemia (Hobbs 1990, Meiner 1991, Gudnason 1993, Gorski 1998, Mandelsham 1998, Heath 1999, Durst 2001, Kuhrova 2002, Taylor 2007, Junyent 2008, Chmara 2010, Tichy 2012, Hooper 2012, Sharifi 2016, Durst 2017, Smyth 2018). It is considered to be a founder mutation in the Ashkenazi Jewish population (Meiner 1991, Durst 2001). This variant has also been identified in 0.05% (5/10062) of Ashkenazi Jewish chromosomes by gnomAD ( <a href="http://gnomad.broadinstitute.org">http://gnomad.broadinstitute.org</a> ) and has been reported in ClinVar (Variation ID 226329). This variant is a deletion of 1 amino acid at position 219 and is not predicted to alter the protein reading-frame. In vitro functional studies support an impact on protein function (Hobbs 1990). This variant meets the following ACMG/AMP Criteria: PS4, PM2, PM4 Supporting, PS3 Supporting. Based on these criteria, the variant would be classified as likely pathogenic but its recognized role as a founder mutation lends additional weight. In summary, the p.Gly219del is classified as pathogenic for autosomal dominant hypercholesterolemia.                                                                                                                                                      |
| <i>LDLR</i><br>2 | 19:11216262:AC><br>-  | p.Asp227GlyfsX12<br>Pathogenic   | The p.Asp227fs variant in <i>LDLR</i> has been reported in at least 9 individuals with hypercholesterolemia (Gudnason 1993, Graham 1999, Bunn 2002, Dedoussis 2004, Martin 2016) and has also been reported in ClinVar (Variation ID #3731). This variant has also been identified in 1/110684 European chromosomes by the Genome Aggregation Database (gnomAD, <a href="http://gnomad.broadinstitute.org">http://gnomad.broadinstitute.org</a> ; dbSNP rs387906305). This variant is predicted to cause a frameshift, which alters the protein's amino acid sequence beginning at position 227 and leads to a premature termination codon 12 amino acids downstream. This alteration is then predicted to lead to a truncated or absent protein. Heterozygous loss of function of the <i>LDLR</i> gene is an established disease mechanism in familial hypercholesterolemia (FH). In summary, this variant meets criteria to be classified as pathogenic for FH in an autosomal dominant manner based upon the predicted impact to the protein, presence in multiple affected individuals and low frequency in controls. ACMG/AMP Criteria applied: PVS1, PM2, PS4 Moderate.                                                                                                                                                                                                                                                            |
| <i>LDLR</i><br>2 | 19:11217264:G>A       | p.Glu240Lys<br>Likely Pathogenic | The p.Glu240Lys variant in <i>LDLR</i> (also described as p.Gly219Lys in the literature) has been reported in 6 individuals with familial hypercholesterolemia (FH) and segregated with disease in 3 affected relatives from two families (Fouchier 2005, Bertolini 2013, Hobbs 1992, Mollaki 2014, Norsworthy 2014). However, this variant has also been reported in one individual with normal cholesterol levels (Abul-Husn 2016), suggesting reduced penetrance. In vitro functional studies provide some evidence that the p.Glu240Lys variant may impact protein folding and transport of the mature protein from the ER to the Golgi (Hobbs 1992, North 2000, North 2001). This variant has also been reported by other clinical laboratories in ClinVar (Variation ID 200920) and has been identified in 7/126728 European chromosomes by the Genome Aggregation Database (gnomAD, <a href="http://gnomad.broadinstitute.org">http://gnomad.broadinstitute.org</a> ; dbSNP 7685633000). This frequency is consistent with the frequency of FH in the general population. Computational prediction tools and conservation analysis do not provide strong support for or against an impact to the protein. In summary, although additional studies are required to fully establish its clinical significance, the p.Glu240Lys variant is likely pathogenic. The ACMG/AMP Criteria applied: PM2; PS3 Supporting; PS4 Moderate; PP1. |
| <i>LDLR</i><br>2 | 19:11221390:G>A       | p.Gly335Ser<br>Likely Pathogenic | The p.Gly335Ser variant in <i>LDLR</i> (also described as p.Glu314Ser in the literature) has been reported in 7 heterozygous individuals with hypercholesterolemia, 1 double heterozygous with hypercholesterolemia (with a pathogenic <i>PCSK9</i> variant) individual, and 1 compound heterozygous individual with homozygous hypercholesterolemia (HoHF; Bertolini 2013, Abul-Husn 2016, Hobbs 1992, Laurie 2004, Rabacchi 2016, Retterer 2015, Wang 2001) as well as 2 individuals with a myocardial infarction (Do 2015, Thomaehlen 2015). This variant segregated in the compound heterozygous state in 3 affected relatives from 1 family, one of which displayed features of HoHF (Rabacchi 2016). Functional studies provide conflicting evidence on the impact of this variant on the protein (Hobbs 1992, Thormaehlen 2015). This variant has also been                                                                                                                                                                                                                                                                                                                                                                                                                                                                                                                                                                       |

|           |                 |                                  |                                                                                                                                                                                                                                                                                                                                                                                                                                                                                                                                                                                                                                                                                                                                                                                                                                                                                                                                                                                                                                                                                                                                                                                                                                                                                                                                                  |
|-----------|-----------------|----------------------------------|--------------------------------------------------------------------------------------------------------------------------------------------------------------------------------------------------------------------------------------------------------------------------------------------------------------------------------------------------------------------------------------------------------------------------------------------------------------------------------------------------------------------------------------------------------------------------------------------------------------------------------------------------------------------------------------------------------------------------------------------------------------------------------------------------------------------------------------------------------------------------------------------------------------------------------------------------------------------------------------------------------------------------------------------------------------------------------------------------------------------------------------------------------------------------------------------------------------------------------------------------------------------------------------------------------------------------------------------------|
|           |                 |                                  | reported in ClinVar (Variation ID 183105) and identified in 7/126504 European chromosomes by the Genome Aggregation Database (gnomAD, <a href="http://gnomad.broadinstitute.org">http://gnomad.broadinstitute.org</a> ). Computational prediction tools and conservation analysis suggest that the p.Gly335Ser variant may impact the protein, though this information is not predictive enough to determine pathogenicity. In summary, although additional studies are required to fully establish its clinical significance, this variant meets criteria to be classified as likely pathogenic for familial hypercholesterolemia (FH) in an autosomal dominant manner. ACMG/AMP Criteria applied: PS4 Moderate, PM3, PP1, PP3, PM2 Supporting.                                                                                                                                                                                                                                                                                                                                                                                                                                                                                                                                                                                                 |
| LDLR<br>2 | 19:11230819:C>T | p.Arg633Cys<br>Likely Pathogenic | The p.Arg633Cys variant in <i>LDLR</i> has been reported in at least 11 individuals with familial hypercholesterolemia (FH), including one homozygote (Day 1997, Mozas 2004, Guardamagna 2009, Taylor 2009, Chiou 2011, Tichy 2012, Bertolini 2013, Xiang 2017, Medieros 2017). This variant has been reported in ClinVar (Variation ID: 226379) and has also been identified in 1/30782 South Asian chromosomes by the Genome Aggregation Database (gnomAD, <a href="http://gnomad.broadinstitute.org">http://gnomad.broadinstitute.org</a> ). Computational prediction tools and conservation analysis suggest that the p.Arg633Cys variant may impact the protein. Two other variants at this amino acid position have been reported in at least 4 individuals with FH (p.Arg633Leu and p.Arg633His). In summary, although additional studies are required to fully establish its clinical significance, the p.Arg633Cys variant is likely pathogenic. ACMG/AMP Criteria applied: PS4 Moderate, PM2, PM5 Supporting, PP3.                                                                                                                                                                                                                                                                                                                     |
| LDLR<br>3 | 19:11216084:G>A | p.Asp168Asn<br>Likely Pathogenic | The p.Asp168Asn variant in <i>LDLR</i> has been reported in at least 8 individuals with familial hypercholesterolemia (FH) and in 2 individuals with early-onset myocardial infarction (Day et al. 1997, Lee et al. 1998, Punzalan et al. 2005, Do et al., 2015, ClinVar: Variation ID 183136). In vitro functional studies provide some evidence that the p.Asp168Asn variant may cause a decrease in LDL uptake and binding (Ettxebarria 2015). This variant has also been identified in 2/111620 European chromosomes by the Genome Aggregation Database (GnomAD, <a href="http://gnomad.broadinstitute.org">http://gnomad.broadinstitute.org</a> ; dbSNP rs200727689). Computational prediction tools and conservation analysis suggest that the p.Asp168Asn variant may impact the protein. Additionally, other variants at this position have been reported in association with FH in the Human Gene Mutation Database (HGMD; Stenson et al. 2017). In summary, although additional studies are required to fully establish its clinical significance, the p.Asp168Asn variant is likely pathogenic. ACMG/AMP Criteria applied (Richards 2015): PS4 Moderate, PS3 Supporting, PM2, PP3.                                                                                                                                                    |
| LDLR<br>3 | 19:11216244:A>G | p.Asp221Gly<br>Pathogenic        | The p.Asp221Gly variant in <i>LDLR</i> has been reported in >75 individuals with familial hypercholesterolemia (FH), including in 4 homozygotes who presented with more severe disease (Hobbs 1992, Chmara 2010, Bertolini 2013). However, not all individuals carrying this variant presented with high cholesterol levels (Bertolini 2013, Thormaehlen 2015). This variant has also been reported by other clinical laboratories in ClinVar (Variation ID 183092) and has been identified in 13/111132 European chromosomes by the Genome Aggregation Database (gnomAD, <a href="http://gnomad.broadinstitute.org">http://gnomad.broadinstitute.org</a> ; dbSNP rs373822756). Please note that this frequency is low enough to be consistent with the frequency of FH in the general population. In vitro functional studies provide some evidence that the p.Asp221Gly variant may impact protein function (Thormaehlen 2015). In summary, this variant meets criteria to be classified as pathogenic for familial hypercholesterolemia in an autosomal dominant manner based upon presence in affected individuals, low frequency in the general population, computational and functional evidence. ACMG/AMP Criteria applied: PS4, PM3 Strong, PP3, PS3 Supporting.                                                                         |
| LDLR<br>3 | 19:11221435:C>T | p.Arg350X<br>Pathogenic          | The p.Arg350X variant in <i>LDLR</i> (also described as p.Arg329X in the literature) has been reported in >15 individuals with hypercholesterolemia and segregated with disease in >15 affected relatives from 8 families (Day 1997, Humphries 2006, Kubalska 2008, Dušková 2011, van der Graaf 2011, Tichý 2012, Huijgen 2012, Radovica-Spáľvina 2015, Do 2015, Fan 2015). This variant has also been identified in 1/111552 European chromosomes by the Genome Aggregation Database (gnomAD, <a href="http://gnomad.broadinstitute.org">http://gnomad.broadinstitute.org</a> ; dbSNP rs769737896) and in ClinVar (Variation ID: 226342). This nonsense variant leads to a premature termination codon at position 350, which is predicted to lead to a truncated or absent protein. Heterozygous loss of function of the <i>LDLR</i> gene is an established disease mechanism in individuals with familial hypercholesterolemia (FH). In summary, this variant meets criteria to be classified as pathogenic for FH in an autosomal dominant manner. The ACMG/AMP Criteria applied: PVS1; PS4; PP1 Strong; PM2.                                                                                                                                                                                                                                |
| LDLR<br>3 | 19:11224266:G>T | p.Asp472Tyr<br>Likely Pathogenic | The p.Asp472Tyr variant in <i>LDLR</i> (also described as p.Asp451Tyr in the literature) has been reported in 10 individuals with familial hypercholesterolemia (FH) and 12 individuals who had a myocardial infarction, and segregated with disease in 3 affected relatives from 2 families (Abul-Husn 2016, Vohnout 2016, Thormaehlen 2015, Tichy 2012, Bertolini 2013, Do 2015, Campagna 2008). This variant has also been reported by other clinical laboratories in ClinVar (Variation ID 183116) and has been identified in 5/30778 of South Asian chromosomes and 8/126504 European chromosomes by the Genome Aggregation Database (gnomAD, <a href="http://gnomad.broadinstitute.org">http://gnomad.broadinstitute.org</a> ; dbSNP 730882102). This frequency is low enough to be consistent with the frequency of FH in the general population. Computational prediction tools and conservation analysis do not provide strong support for or against an impact to the protein and in vitro functional assays were unclear in their overall impact (Thormaehlen 2015). In summary, although additional studies are required to fully establish its clinical significance, the p.Asp472Tyr variant is likely pathogenic. The ACMG/AMP Criteria applied (Richards 2015): PS4, PM2, PP1.                                                   |
| LDLR<br>3 | 19:11224443:G>A | c.1586+5G>A<br>Likely Pathogenic | The c.1586+5G>A variant in <i>LDLR</i> has been reported in 7 individuals with familial hypercholesterolemia (FH) and segregated with disease in at least 7 affected relatives from 2 families (Ekstrom 1995, Jensen 1999, Fouchier 2005, Taylor 2007, Guardamagna 2009, Mollaki 2014). Additionally, this variant has been identified in 6/30752 South Asian chromosomes by the Genome Aggregation Database (gnomAD, <a href="http://gnomad.broadinstitute.org">http://gnomad.broadinstitute.org</a> ) and is present in ClinVar (Variation ID: 251909). Please note that for diseases with clinical variability, reduced penetrance, or recessive inheritance, pathogenic variants may be present at a low frequency in the general population. In vitro functional studies provide some evidence that the c.1586+5G>A variant may impact protein function (Jensen 1999). This variant is located in the 5' splice region. Computational tools do suggest an impact to splicing. In summary, although additional studies are required to fully establish its clinical significance, the c.1586+5G>A variant is likely pathogenic for FH in an autosomal dominant manner based on cased observations, segregation studies, functional and computational evidence. The ACMG/AMP Criteria applied: PP1 Strong, PS4 Moderate, PP3, PS3 Supporting. |
| LDLR<br>3 | 19:11227549:C>T | p.Arg574Cys<br>Likely Pathogenic | The p.Arg574Cys variant in <i>LDLR</i> has been reported in 10 individuals with familial hypercholesterolemia (FH) and segregated with disease in 3 affected individuals from at least 2 families (Nauck 2001, Chmara 2010, Bertolini 2013, Thormaehlen 2015, Sharifi 2016, Guardamagna 2009,                                                                                                                                                                                                                                                                                                                                                                                                                                                                                                                                                                                                                                                                                                                                                                                                                                                                                                                                                                                                                                                    |

|                  |                 |                                     |                                                                                                                                                                                                                                                                                                                                                                                                                                                                                                                                                                                                                                                                                                                                                                                                                                                                                                                                                                                                                                                                                                                                                                                                                                                                                                                                                                                                                                                                                                                                              |
|------------------|-----------------|-------------------------------------|----------------------------------------------------------------------------------------------------------------------------------------------------------------------------------------------------------------------------------------------------------------------------------------------------------------------------------------------------------------------------------------------------------------------------------------------------------------------------------------------------------------------------------------------------------------------------------------------------------------------------------------------------------------------------------------------------------------------------------------------------------------------------------------------------------------------------------------------------------------------------------------------------------------------------------------------------------------------------------------------------------------------------------------------------------------------------------------------------------------------------------------------------------------------------------------------------------------------------------------------------------------------------------------------------------------------------------------------------------------------------------------------------------------------------------------------------------------------------------------------------------------------------------------------|
|                  |                 |                                     | Do 2015). It has also been identified in 8/129194 European chromosomes by gnomAD ( <a href="http://gnomad.broadinstitute.org">http://gnomad.broadinstitute.org</a> ) and has been reported in ClinVar (Variation ID: 183123). Computational prediction tools and conservation analysis suggest that this variant may impact the protein, though this information is not predictive enough to determine pathogenicity. In vitro functional studies provide some evidence that this variant does not impact <i>LDLR</i> uptake in cells (Thormaehlen 2015); however, these types of assays may not accurately represent biological function. Three additional variants involving this codon (p.Arg574) have been identified in individuals with FH (Stenson 2017). In summary, while there is some suspicion for a pathogenic role, the clinical significance of this variant is uncertain. ACMG/AMP Criteria applied: PS4, PM2_Supporting, PP1, PP3.                                                                                                                                                                                                                                                                                                                                                                                                                                                                                                                                                                                          |
| <i>LDLR</i><br>4 | 19:11215919:G>A | p.Glu113Lys<br>Likely Pathogenic    | The p.Glu113Lys variant in <i>LDLR</i> has been reported in 2 individuals with hypercholesterolemia, 1 individual with probable hypercholesterolemia, and segregated with disease in 7 affected individuals from 1 family (Wu 2000, Fouchier 2005, Taylor 2007). It has also been identified in 0.002% (3/128566) of European chromosomes by gnomAD ( <a href="http://gnomad.broadinstitute.org">http://gnomad.broadinstitute.org</a> ) and is reported in ClinVar (Variation ID: 237872). Computational prediction tools and conservation analysis suggest that this variant may not impact the protein, though this information is not predictive enough to rule out pathogenicity. In summary, although additional studies are required to fully establish its clinical significance, this variant meets criteria to be classified as likely pathogenic for autosomal dominant hypercholesterolemia. ACMG/AMP Criteria applied: PP1 Strong, PM2, PS4_Supporting, BP4.                                                                                                                                                                                                                                                                                                                                                                                                                                                                                                                                                                     |
| <i>LDLR</i><br>5 | 19:11224296:G>A | p.Asp482Asn<br>Pathogenic           | The p.Asp482Asn variant in <i>LDLR</i> has been reported in at least 24 heterozygous individuals and 1 compound heterozygous individual with hypercholesterolemia or early myocardial infarction and segregated with disease in 3 affected individuals from 2 families (Ward 1995, Webb 1996, Leren 2004, Graham 2005, Tichy 2012, Bertolini 2013, Lange 2014, Do 2015, Braenne 2015). It has also been identified in 0.009% (11/129018) of European chromosomes by gnomAD ( <a href="http://gnomad.broadinstitute.org">http://gnomad.broadinstitute.org</a> ) and has been reported in ClinVar (Variation ID: 161284). Computational prediction tools and conservation analysis are consistent with pathogenicity. In vitro functional studies support an impact on protein function (Webb 1996). 3 variants at this position (p.Asp482Gly, p.Asp482His, p.Asp482Tyr) have been identified in patients with hypercholesterolemia, suggesting changes at this position may not be tolerated. In summary, this variant meets criteria to be classified as pathogenic for autosomal dominant hypercholesterolemia. ACMG/AMP Criteria applied: PS4, PM3, PP1, PP3, PS3_Supporting, PM5_Supporting.                                                                                                                                                                                                                                                                                                                                              |
| <i>LDLR</i><br>5 | 19:11226817:G>A | p.Gly545Glu<br>Likely Pathogenic    | The p.Gly545Glu variant in <i>LDLR</i> has been reported in 1 large Pakistani family with familial hypercholesterolemia (FH) and segregated with disease in 3 homozygous and 17 heterozygous affected relatives (Ahmed 2013). Overall mean total cholesterol levels were significantly higher in those family members with the p.Gly545Glu variant compared to those without. Additionally, total cholesterol levels in homozygotes was significantly higher than heterozygotes. This variant has also been reported by other clinical laboratories in ClinVar (Variation ID: 251945) and has been identified in 0.007% (2/30616) of South Asian chromosomes by gnomAD ( <a href="http://gnomad.broadinstitute.org">http://gnomad.broadinstitute.org</a> ). This frequency is low enough to be consistent with the frequency of FH in the general population. Computational prediction tools and conservation analyses do not provide strong support for or against an impact to the protein. In summary, although additional studies are required to fully establish its clinical significance, this variant meets criteria to be classified as likely pathogenic for autosomal dominant FH. ACMG/AMP Criteria applied: PP1 Strong, PM2.                                                                                                                                                                                                                                                                                                    |
| <i>LDLR</i><br>6 | 19:11213450:G>A | p.Glu101Lys<br>Pathogenic           | The p.Glu101Lys variant in <i>LDLR</i> has been reported in the heterozygous state in >30 individuals with familial hypercholesterolemia (FH), in the compound heterozygous state in 1 individual with homozygous FH (Loux 1992, Webb 1992, Garcia-Garcia 2001, Mozas 2004, Humphries 2006, Miyakem2009, Taylor 2010, Futema 2013, Do 2015) and segregated with disease in four affected relatives from two families (Webb 1992, Loux 1992). This variant has also been reported by other clinical laboratories in ClinVar (Variation ID# 161266). In vitro functional studies provide some evidence that the p.Glu101Lys variant may impact protein function (Webb 1992). This variant has also been identified in 3/111700 European chromosomes by the genome Aggregation Database (gnomAD, <a href="http://gnomad.broadinstitute.org">http://gnomad.broadinstitute.org</a> ). This frequency is low enough to be consistent with the frequency of FH in the general population. Computational prediction tools and conservation analysis suggests that the p.Glu101Lys variant may impact the protein, though this information is not predictive enough to determine pathogenicity. In summary, this variant meets criteria to be classified as pathogenic for familial hypercholesterolemia in an autosomal dominant manner based upon presence in multiple affected individuals, segregation studies, low frequency in the general population and functional evidence. The ACMG/AMP Criteria applied: PS4, PM2, PS3 Moderate, PP1, PP3. |
| <i>LDLR</i><br>6 | 19:11231112:C>T | p.Pro685Leu<br>Pathogenic           | The p.Pro685Leu variant in <i>LDLR</i> , also described as p.Pro664Leu in the literature, has been reported in >40 individuals with familial hypercholesterolemia (FH), segregated with disease in >40 affected relatives from at least 4 families, and was identified in the homozygous state in at least 10 individuals with FH (Bertolini 2013, Sharifi 2016, Medeiros 2010, Rubinsztein 1992, Soutar 1991, Thormaehlen 2015, Van Der Graaf 2011). This variant has also been reported by other clinical laboratories in Clinvar (Variation ID 3702) and was identified in 6/126656 European chromosomes by the Genome Aggregation Database (gnomAD, <a href="http://gnomad.broadinstitute.org">http://gnomad.broadinstitute.org</a> ; dbSNP rs28942084). However, this frequency is low enough to be consistent with the frequency of FH in the general population. In vitro functional studies provide some evidence that the p.Pro685Leu variant may impact protein function (Knight 1989, Rubinsztein 1992, Thormaehlen 2015). In summary, this variant meets criteria to be classified as pathogenic for familial hypercholesterolemia in an autosomal dominant manner based upon presence in multiple affected individuals, segregation studies, low frequency in controls and functional evidence. The ACMG/AMP Criteria applied: PS4, PP1 Strong, PM2, PS3_Supporting.                                                                                                                                                            |
| <i>MLH1</i><br>1 | 3:37035120:C>-  | p.Pro28GlnfsX8<br>Likely Pathogenic | The p.Pro28GlnfsX8 variant in <i>MLH1</i> has not been previously reported in individuals with <i>MLH1</i> -related cancers and was absent from large population studies. This variant is predicted to cause a frameshift, which alters the protein's amino acid sequence beginning at position 28 and leads to a premature termination codon 8 amino acids downstream. This alteration is then predicted to lead to a truncated or absent protein.                                                                                                                                                                                                                                                                                                                                                                                                                                                                                                                                                                                                                                                                                                                                                                                                                                                                                                                                                                                                                                                                                          |

|                  |                      |                                      |                                                                                                                                                                                                                                                                                                                                                                                                                                                                                                                                                                                                                                                                                                                                                                                                                                                                                                                                                                                                                                                                                                                                                                                                                                                                                                                                    |
|------------------|----------------------|--------------------------------------|------------------------------------------------------------------------------------------------------------------------------------------------------------------------------------------------------------------------------------------------------------------------------------------------------------------------------------------------------------------------------------------------------------------------------------------------------------------------------------------------------------------------------------------------------------------------------------------------------------------------------------------------------------------------------------------------------------------------------------------------------------------------------------------------------------------------------------------------------------------------------------------------------------------------------------------------------------------------------------------------------------------------------------------------------------------------------------------------------------------------------------------------------------------------------------------------------------------------------------------------------------------------------------------------------------------------------------|
|                  |                      |                                      | Loss of function of the <i>MLH1</i> gene is an established disease mechanism in autosomal dominant Lynch syndrome. In summary, this variant meets criteria to be classified as likely pathogenic for autosomal dominant Lynch syndrome. ACMG/AMP criteria applied: PVS1, PM2.                                                                                                                                                                                                                                                                                                                                                                                                                                                                                                                                                                                                                                                                                                                                                                                                                                                                                                                                                                                                                                                      |
| <i>MLH1</i><br>1 | 3:37053348:A>T       | p.Lys195X<br>Likely Pathogenic       | The p.Lys195X variant in <i>MLH1</i> has been reported in 1 individual with colorectal cancer (Hinrichsen 2015). It was absent from large population studies and has been reported in ClinVar (Variation ID 218025). This nonsense variant leads to a premature termination codon at position 195, which is predicted to lead to a truncated or absent protein. Loss of function of the <i>MLH1</i> gene is an established disease mechanism in autosomal dominant Lynch syndrome. In summary, although additional studies are required to fully establish its clinical significance, this variant meets criteria to be classified as pathogenic for autosomal dominant Lynch syndrome. ACMG/AMP Criteria applied: PVS1, PM2                                                                                                                                                                                                                                                                                                                                                                                                                                                                                                                                                                                                       |
| <i>MLH1</i><br>1 | 3:37067499:G>A       | c.1409+1G>A<br>Pathogenic            | The c.1409+1G>A variant in <i>MLH1</i> has been previously reported in 1 individual suspected to have Lynch syndrome (Irmejs 2007) and was absent from large population studies. This variant was classified as Pathogenic by several clinical labs in ClinVar and as Likely pathogenic on September 5, 2013 by the ClinGen-approved InSiGHT expert panel (Variation ID 89718). This variant occurs within the canonical splice site (+/- 1,2) and is predicted to cause altered splicing leading to an abnormal or absent protein. Other variants involving this position (c.1409+1G>C, c.1409+1G>T) have been classified as likely pathogenic/Pathogenic in ClinVar. Heterozygous loss-of-function of the <i>MLH1</i> gene is an established disease mechanism in individuals with Lynch syndrome. In summary, this variant meets criteria to be classified as pathogenic for autosomal dominant Lynch syndrome. ACMG/AMP criteria applied: PVS1, PM2, PM5.                                                                                                                                                                                                                                                                                                                                                                      |
| <i>MLH1</i><br>1 | 3:37070316:A>-       | p.Asp484ValfsX7<br>Likely Pathogenic | The p.Asp484ValfsX7 variant in <i>MLH1</i> has been previously reported in at least 1 individual with Lynch syndrome (Sjursen 2016) and was absent from large population studies. It is predicted to cause a frameshift, which alters the protein's amino acid sequence beginning at position 484 and leads to a premature termination codon 7 amino acids downstream. This alteration is then predicted to lead to a truncated or absent protein. Heterozygous loss of function of the <i>MLH1</i> gene is an established disease mechanism in individuals with Lynch syndrome. In summary, this variant meets criteria to be classified as pathogenic for autosomal dominant Lynch syndrome. ACMG/AMP Criteria applied: PVS1, PM2.                                                                                                                                                                                                                                                                                                                                                                                                                                                                                                                                                                                               |
| <i>MLH1</i><br>1 | 3:37089123:GAA<br>>- | p.Lys618del<br>Pathogenic            | The p.Lys618del (also known as p.Lys616del) variant in <i>MLH1</i> has been reported at least 7 individuals affected with Lynch syndrome (including at least 1 family with Turcot syndrome) and segregated with disease in at least 16 affected family members from 4 families (Syngal 1999, Raevaara 2003, Takahashi 2007, Ricker 2017, Viel 1997, Wijnen 1996, Hamilton 1995). It has also been identified in 1/113698 of European chromosomes by gnomAD ( <a href="http://gnomad.broadinstitute.org">http://gnomad.broadinstitute.org</a> ). This variant was classified as Pathogenic by several clinical labs in ClinVar and on September 5, 2013 by the ClinGen-approved InSiGHT expert panel (Variation ID 17080). This variant is a deletion of 1 amino acid at position 618 and is not predicted to alter the protein reading-frame. In vitro and in vivo functional studies support an impact on protein function (Raevaara 2003, Schmutte 2001, Guerette 1999, Kondo 2003, Takahashi 2007). In summary, this variant meets criteria to be classified as pathogenic for autosomal dominant Lynch syndrome. ACMG/AMP Criteria applied: PP1_Strong, PM2, PS3_Moderate, PS4_Moderate, PM4_Supporting.                                                                                                                       |
| <i>MLH1</i><br>1 | 3:37090464:C>T       | p.Arg687Trp<br>Pathogenic            | The p.Arg687Trp variant in <i>MLH1</i> has been previously reported in at least 16 individuals with Lynch syndrome (von Salome 2018, Jakubowska 2001, Furukawa 2002, Caldes 2002) and 3 homozygous siblings affected with constitutive mismatch repair deficiency (Durno 2012). It is considered a founder mutation for Lynch syndrome in Sweden (von Salome 2018). It has also been identified in 3/30612 of South Asian chromosomes by gnomAD ( <a href="http://gnomad.broadinstitute.org">http://gnomad.broadinstitute.org</a> ). This variant was classified as Pathogenic by several clinical labs in ClinVar and on September 5, 2013 by the ClinGen-approved InSiGHT expert panel (Variation ID 90014). Computational prediction tools and conservation analyses suggest that this variant may impact the protein, though this information is not predictive enough to determine pathogenicity. In vitro functional studies provide some evidence that this variant mildly impacts protein function (Takahashi 2007, Christensen 2009, Kansikas 2011); however, these types of assays may not accurately represent biological function. In summary, this variant meets criteria to be classified as pathogenic for autosomal dominant Lynch syndrome. ACMG/AMP criteria applied: PS4, PP1_Strong, PM3, PM2_Supporting, PP4. |
| <i>MLH1</i><br>2 | 3:37038192:G>A       | p.Gly67Arg<br>Pathogenic             | The p.Gly67Arg variant in <i>MLH1</i> has been identified in a large number of individuals with Lynch syndrome and segregated with disease in at least 4 affected family members in 2 families (Tannergard 1995, Mitchell 2002, Alazzouzi 2005, Lagerstedt Robinson 2007, InSiGHT database: <a href="http://chromium.lovd.nl/LOVD2/colon_cancer/variants.php">http://chromium.lovd.nl/LOVD2/colon_cancer/variants.php</a> ). This variant was absent from large population studies. Mice carrying the p.Gly67Arg variant have a strong cancer predisposition phenotype (Avdievich 2008). Additionally, this variant has been classified as pathogenic on Sep 5, 2013 by the ClinGen-approved InSiGHT panel (ClinVar SCV000106471.2). In summary, this variant meets criteria to be classified as pathogenic for Lynch syndrome in an autosomal dominant manner. ACMG/AMP criteria applied: PM2, PS4, PP1_Supporting, PS3.                                                                                                                                                                                                                                                                                                                                                                                                          |
| <i>MLH1</i><br>2 | 3:37083758:G>A       | c.1668-1G>A<br>Pathogenic            | The c.1668-1G>A variant in <i>MLH1</i> has been reported in at least 4 individuals with Lynch Syndrome (Lamberti 2006, Arnold 2009, Pérez-Carbonell 2012, Shirts 2016) and was found to segregate with disease in 2 additional affected individuals in one family (Arnold 2009). This variant was absent from large population studies. This variant occurs in the invariant region (+/- 1,2) of the splice consensus sequence and has been observed to cause altered splicing leading to an abnormal or absent protein (Arnold 2009, Pérez-Carbonell 2012). Heterozygous loss of function of the <i>MLH1</i> gene is an established disease mechanism in Lynch Syndrome. Additionally, this variant has been classified as Likely pathogenic on Sep 5, 2013 by the ClinGen-approved InSiGHT panel (ClinVar SCV000106296.2). In summary, this variant meets criteria to be classified as pathogenic for Lynch Syndrome in an autosomal dominant manner. ACMG/AMP criteria applied: PM2, PS4_Supporting, PVS1.                                                                                                                                                                                                                                                                                                                      |
| <i>MLH1</i><br>3 | 3:37042536:C>T       | p.Arg100X<br>Pathogenic              | The p.Arg100X variant in <i>MLH1</i> has been reported in at least 10 individuals with Lynch syndrome and segregated with disease in at least 6 affected individuals from 2 families (Wang 1999, Samowitz 2001, Renkonen 2003, Renkonen 2004, Taylor 2003 Mangold 2005, Choi 2009, Hampel 2005, Lagerstedt 2007, Peel 2000, Gylling 2007). It was absent from large population studies. This variant was classified as Pathogenic on September 5, 2013 by the ClinGen-approved InSiGHT expert panel (Variation ID 36550). This nonsense variant leads to a premature termination codon at position 100, which is predicted to lead to a truncated or absent protein. Loss of function of the <i>MLH1</i> gene is an established disease mechanism in autosomal dominant Lynch syndrome. In summary, this variant meets criteria to be classified as pathogenic for autosomal dominant Lynch syndrome. ACMG/AMP Criteria applied: PVS1, PM2, PS4_Moderate, PP1_Moderate.                                                                                                                                                                                                                                                                                                                                                            |

|                  |                    |                                       |                                                                                                                                                                                                                                                                                                                                                                                                                                                                                                                                                                                                                                                                                                                                                                                                                                                                                                                                                                                                                                                                                                                                                                                                                                                                      |
|------------------|--------------------|---------------------------------------|----------------------------------------------------------------------------------------------------------------------------------------------------------------------------------------------------------------------------------------------------------------------------------------------------------------------------------------------------------------------------------------------------------------------------------------------------------------------------------------------------------------------------------------------------------------------------------------------------------------------------------------------------------------------------------------------------------------------------------------------------------------------------------------------------------------------------------------------------------------------------------------------------------------------------------------------------------------------------------------------------------------------------------------------------------------------------------------------------------------------------------------------------------------------------------------------------------------------------------------------------------------------|
| <i>MLH1</i><br>6 | 3:37083822:G>A     | p.Ser577Ser<br>Pathogenic             | The p.Ser577Ser variant in <i>MLH1</i> has been previously reported in at least 17 individuals with Lynch syndrome (Auclair 2006, Tournier 2008, Bozzao 2011, Kurzawski 2006, Kohonen-Corish 1996, Mangold 2005, Hinrichsen 2014, Betz 2010, Simbolo 2015, Pagenstecher 2006, De Lellis 2013) and was absent from large population studies. This variant was classified as Pathogenic by several clinical labs in ClinVar and on September 5, 2013 by the ClinGen-approved InSiGHT expert panel (Variation ID 89857). This variant is located in the last three bases of the exon, which is part of the 5' splice region. Computational tools do not predict a splicing impact, though this information is not predictive enough to rule out pathogenicity. In vitro and in vivo functional studies support an impact on protein function, due to out-of-frame exon skipping (Auclair 2006, Tournier 2008, Kohonen-Corish 1996, Betz 2010, Pagenstecher 2006, De Lellis 2013). Heterozygous loss-of-function of the <i>MLH1</i> gene is an established disease mechanism in individuals with Lynch syndrome. In summary, this variant meets criteria to be classified as pathogenic for autosomal dominant Lynch syndrome. ACMG/AMP criteria applied: PS3, PS4, PM2. |
| <i>MSH2</i><br>1 | 2:47657016:->TACCG | p.Leu407ThrfsX7<br>Likely Pathogenic  | The p.Leu407ThrfsX7 variant in <i>MSH2</i> has not been previously reported in individuals with Lynch syndrome and was absent from large population studies. This variant is predicted to cause a frameshift, which alters the protein's amino acid sequence beginning at position 407 and leads to a premature termination codon 7 amino acids downstream. This alteration is then predicted to lead to a truncated or absent protein. Loss of function of the <i>MSH2</i> gene is an established disease mechanism in autosomal dominant Lynch syndrome. In summary, although additional studies are required to fully establish its clinical significance, the p.Leu407ThrfsX7 variant meets criteria to be classified as likely pathogenic for Lynch syndrome. ACMG/AMP criteria applied: PVS1, PM2.                                                                                                                                                                                                                                                                                                                                                                                                                                                             |
| <i>MSH2</i><br>1 | 2:47705528:T>-     | p.Cys778AlafsX34<br>Likely Pathogenic | The p.Cys778AlafsX34 variant in <i>MSH2</i> has not been previously reported in individuals with Lynch syndrome and was absent from large population studies. This variant is predicted to cause a frameshift, which alters the protein's amino acid sequence beginning at position 778 and leads to a premature termination codon 34 amino acids downstream. This alteration is then predicted to lead to a truncated or absent protein. Loss of function of the <i>MSH2</i> gene is an established disease mechanism in autosomal dominant Lynch syndrome. In summary, although additional studies are required to fully establish its clinical significance, the p.Cys778AlafsX34 variant meets criteria to be classified as likely pathogenic for Lynch syndrome. ACMG/AMP criteria applied: PVS1, PM2.                                                                                                                                                                                                                                                                                                                                                                                                                                                          |
| <i>MSH2</i><br>2 | 2:47635539:G>A     | c.212-1G>A<br>Pathogenic              | The c.212-1G>A variant in <i>MSH2</i> has been reported in 1 individual affected with colorectal cancer (Overbeek 2007), 1 individual with Lynch syndrome (De Lellis 2013), 1 individual with bladder cancer (van der Post 2010), and 1 individual with clinical suspicion of Lynch syndrome (Ramsoekh 2008). It was absent from large population studies. This variant was classified as Pathogenic on September 5, 2013 by the ClinGen-approved InSiGHT expert panel (Variation ID 90892). This variant occurs within the canonical splice site (+/- 1,2) and is predicted to cause altered splicing leading to an abnormal or absent protein. Loss of function of the <i>MSH2</i> gene is an established disease mechanism in autosomal dominant Lynch syndrome. In summary, the c.212-1G>A variant meets criteria to be classified as pathogenic for Lynch syndrome. ACMG/AMP criteria applied: PVS1, PM2, PS4 Supporting.                                                                                                                                                                                                                                                                                                                                       |
| <i>MSH2</i><br>2 | 2:47643458:CT>-    | p.Gln324ValfsX8<br>Pathogenic         | The p.Gln324ValfsX8 (c.969_970delTC) variant in <i>MSH2</i> has been reported in 4 individuals with colorectal cancer/Lynch syndrome and segregated with disease in 4 affected family members (Sjursen 2010, Hansen 2014, Tanyi 2014, Koder 2017). It was also absent from large population studies. This variant is predicted to cause a frameshift, which alters the protein's amino acid sequence beginning at position 324 and leads to a premature termination codon 8 amino acids downstream. This alteration is then predicted to lead to a truncated or absent protein. Another variant, c.970_971delCA (ClinVar ID 91262), resulting in the same amino acid change has been identified in several individuals with Lynch syndrome (Goldberg 2015). Loss of function of the <i>MSH2</i> gene is an established disease mechanism in autosomal dominant Lynch syndrome. In summary, the p.Gln324ValfsX8 variant meets criteria to be classified as pathogenic for Lynch syndrome. ACMG/AMP criteria applied: PVS1, PS1, PS4 Supporting, PM2, PP1.                                                                                                                                                                                                             |
| <i>MSH6</i><br>3 | 2:48025764:C>G     | p.Tyr214X,NA<br>Pathogenic            | The p.Tyr214X variant in <i>MSH6</i> has been previously reported in the heterozygous state in at least 1 individual with colorectal cancer (Verma 1999), 1 individual with metastatic prostate cancer (Pritchard 2016), and 1 individual with multiple sebaceous adenomas/embryonal teratoma of the testis and family history of gastrointestinal cancers (Murphy 2008), and in the compound heterozygous state in 1 individual with constitutional mismatch repair-deficiency (Scott 2007). It was absent from large population studies. This variant was classified as Pathogenic on September 5, 2013 by the ClinGen-approved InSiGHT expert panel (Variation ID 89547). This nonsense variant leads to a premature termination codon at position 214, which is predicted to lead to a truncated or absent protein. Heterozygous loss of function of the <i>MSH6</i> gene is an established disease mechanism in individuals with Lynch syndrome. In summary, this variant meets criteria to be classified as pathogenic for autosomal dominant Lynch syndrome. ACMG/AMP criteria applied: PVS1, PM2, PS4 Supporting, PM3.                                                                                                                                       |
| <i>MSH6</i><br>1 | 2:48010634:T>A     | c.260+2T>A<br>Likely Pathogenic       | The c.260+2T>A variant in <i>MSH6</i> has not been previously reported in individuals with Lynch syndrome or in large population studies but has been reported by other clinical laboratories in ClinVar (Variation ID 492704). This variant occurs within the canonical splice site (+/- 1,2) and is predicted to cause altered splicing leading to an abnormal or absent protein. Heterozygous loss-of-function of the <i>MSH6</i> gene is an established disease mechanism in individuals with Lynch syndrome. In summary, this variant meets criteria to be classified as likely pathogenic for autosomal dominant Lynch syndrome based upon predicted impact to the protein and absence in controls. ACMG/AMP criteria applied: PVS1, PM2.                                                                                                                                                                                                                                                                                                                                                                                                                                                                                                                      |
| <i>MSH6</i><br>1 | 2:48025796:->TG    | p.Glu226ValfsX21<br>Likely Pathogenic | The p.Glu226ValfsX21 variant in <i>MSH6</i> has been reported in 1 individual with Lynch syndrome (as c.674insTG; Talseth-Palmer 2010) and was absent from large population studies. This variant is predicted to cause a frameshift, which alters the protein's amino acid sequence beginning at position 226 and leads to a premature termination codon 21 amino acids downstream. This alteration is then predicted to lead to a truncated or absent protein. Loss of function of the <i>MSH6</i> gene is an established disease mechanism in autosomal dominant Lynch syndrome. In summary, the p.Glu226ValfsX21 variant meets criteria to be classified as pathogenic for Lynch syndrome. ACMG/AMP criteria applied: PVS1, PM2.                                                                                                                                                                                                                                                                                                                                                                                                                                                                                                                                 |
| <i>MSH6</i><br>1 | 2:48025840:C>T     | p.Arg240X<br>Pathogenic               | The p.Arg240X variant in <i>MSH6</i> has been previously reported in 1 individual referred for multigene panel testing (Espenschied 2017), 2 individuals with colorectal cancer, one of which was MSI-low (DeRycke 2017, Yan 2008), and 1 individual with Lynch syndrome and                                                                                                                                                                                                                                                                                                                                                                                                                                                                                                                                                                                                                                                                                                                                                                                                                                                                                                                                                                                         |

|                  |                       |                                       |                                                                                                                                                                                                                                                                                                                                                                                                                                                                                                                                                                                                                                                                                                                                                                                                                                                                                                                                                                                                                                                                                                                                               |
|------------------|-----------------------|---------------------------------------|-----------------------------------------------------------------------------------------------------------------------------------------------------------------------------------------------------------------------------------------------------------------------------------------------------------------------------------------------------------------------------------------------------------------------------------------------------------------------------------------------------------------------------------------------------------------------------------------------------------------------------------------------------------------------------------------------------------------------------------------------------------------------------------------------------------------------------------------------------------------------------------------------------------------------------------------------------------------------------------------------------------------------------------------------------------------------------------------------------------------------------------------------|
|                  |                       |                                       | segregated with disease in 2 affected family members (Kovac 2011). It was also identified in 1/30606 of South Asian chromosomes by gnomAD ( <a href="http://gnomad.broadinstitute.org">http://gnomad.broadinstitute.org</a> ). This variant was classified as Pathogenic on September 5, 2013 by the ClinGen-approved InSiGHT expert panel (Variation ID 89559). This nonsense variant leads to a premature termination codon at position 240, which is predicted to lead to a truncated or absent protein. Heterozygous loss of function of the <i>MSH6</i> gene is an established disease mechanism in individuals with Lynch syndrome. In summary, this variant meets criteria to be classified as pathogenic for autosomal dominant Lynch syndrome. ACMG/AMP criteria applied: PVS1, PM2, PS4 Supporting.                                                                                                                                                                                                                                                                                                                                 |
| <i>MSH6</i><br>1 | 2:48025863:->C        | p.Arg248ProfsX8<br>Likely Pathogenic  | The p.Arg248ProfsX8 variant in <i>MSH6</i> has not been previously reported in individuals with Lynch syndrome and was absent from large population studies. This variant is predicted to cause a frameshift, which alters the protein's amino acid sequence beginning at position 248 and leads to a premature termination codon 8 amino acids downstream. This alteration is then predicted to lead to a truncated or absent protein. Heterozygous loss of function of the <i>MSH6</i> gene is an established disease mechanism in individuals with autosomal dominant Lynch syndrome. In summary, although additional studies are required to fully establish its clinical significance, the p.Arg248ProfsX8 variant meets criteria to be classified as likely pathogenic for autosomal dominant Lynch syndrome. ACMG/AMP Criteria applied: PVS1; PM2.                                                                                                                                                                                                                                                                                     |
| <i>MSH6</i><br>1 | 2:48025864:C>T        | p.Arg248X<br>Pathogenic               | The p.Arg248X variant in <i>MSH6</i> has been previously reported in 1 individual with Lynch syndrome (Steinke 2008) and 2 individuals with colorectal cancer (Wijnen 1999, Hendricks 2003). It was absent from large population studies. This variant was classified as Pathogenic on September 5, 2013 by the ClinGen-approved InSiGHT expert panel (Variation ID 89563). This nonsense variant leads to a premature termination codon at position 248, which is predicted to lead to a truncated or absent protein. Heterozygous loss of function of the <i>MSH6</i> gene is an established disease mechanism in individuals with Lynch syndrome. In summary, this variant meets criteria to be classified as pathogenic for autosomal dominant Lynch syndrome. ACMG/AMP criteria applied: PVS1, PM2, PS4 Supporting.                                                                                                                                                                                                                                                                                                                      |
| <i>MSH6</i><br>1 | 2:48026014:C>T        | p.Arg298X<br>Pathogenic               | The p.Arg298X variant in <i>MSH6</i> has been reported in at least 2 individuals with <i>MSH6</i> -associated cancers (Goodfellow 2015, Susswein et al. 2016) and has also been identified in 1/15278 African chromosomes by the genome Aggregation Database (gnomAD, <a href="http://gnomad.broadinstitute.org">http://gnomad.broadinstitute.org</a> ). This nonsense variant leads to a premature termination codon at position 298, which is predicted to lead to a truncated or absent protein. Heterozygous loss of function of the <i>MSH6</i> gene is an established disease mechanism in Lynch syndrome. Moreover, this variant was classified as pathogenic on September 5, 2013 by the ClinGen-approved InSiGHT expert panel (ClinVar SCV000108264.2). In summary, this variant meets criteria to be classified as pathogenic for Lynch syndrome in an autosomal dominant manner based upon the predicted impact on the protein and low frequency in controls. ACMG/AMP Criteria applied: PS4 Supporting, PM2, PVS1.                                                                                                                |
| <i>MSH6</i><br>1 | 2:48026310:->T        | p.Tyr397LeufsX4<br>Likely Pathogenic  | The p.Tyr397LeufsX4 variant in <i>MSH6</i> has not been previously reported in individuals with Lynch syndrome and was absent from large population studies. It has been reported in ClinVar (variation ID 418928). This variant is predicted to cause a frameshift, which alters the protein's amino acid sequence beginning at position 379 and leads to a premature termination codon 4 amino acids downstream. This alteration is then predicted to lead to a truncated or absent protein. Heterozygous loss of function of the <i>MSH6</i> gene is an established disease mechanism in individuals with autosomal dominant Lynch syndrome. In summary, although additional studies are required to fully establish its clinical significance, the p.Tyr397LeufsX4 variant meets criteria to be classified as likely pathogenic for autosomal dominant Lynch syndrome. ACMG/AMP Criteria applied: PVS1; PM2.                                                                                                                                                                                                                              |
| <i>MSH6</i><br>1 | 2:48026468:T>C        | p.Leu449Pro<br>Pathogenic             | The p.Leu449Pro variant in <i>MSH6</i> has been reported in >10 individuals with <i>MSH6</i> -associated cancers from a large multigenerational Swedish family (Cederquist 2004, Cederquist 2005). In addition, the majority of tumors sampled from these individuals showed microsatellite instability and lacked <i>MSH6</i> expression. This variant has also been identified in 3/113542 of European chromosomes by gnomAD ( <a href="http://gnomad.broadinstitute.org">http://gnomad.broadinstitute.org</a> ). Computational prediction tools and conservation analysis suggest that this variant may impact the protein, though this information is not predictive enough to determine pathogenicity. Furthermore, this variant was classified as Pathogenic on Sept. 5, 2013 by the ClinGen-approved InSiGHT Expert Panel (ClinVar SCV000107853). In summary, the p.Leu449Pro variant meets criteria to be classified as pathogenic for Lynch Syndrome in an autosomal dominant manner based upon segregation studies and low frequency in controls. ACMG/AMP Criteria applied: PP1 Strong, PM2, PP3, PS3 Strong.                      |
| <i>MSH6</i><br>1 | 2:48026752:G>-        | p.Glu544LysfsX27<br>Likely Pathogenic | The p.Glu544LysfsX27 variant in <i>MSH6</i> has not been previously reported in individuals with Lynch Syndrome and was absent from large population studies. This variant is predicted to cause a frameshift, which alters the protein's amino acid sequence beginning at position 544 and leads to a premature termination codon 27 amino acids downstream. This alteration is then predicted to lead to a truncated or absent protein. Heterozygous loss of function of the <i>MSH6</i> gene is an established disease mechanism in individuals with Lynch syndrome. In summary, this variant meets criteria to be classified as likely pathogenic for autosomal dominant Lynch syndrome. ACMG/AMP criteria applied: PVS1, PM2.                                                                                                                                                                                                                                                                                                                                                                                                            |
| <i>MSH6</i><br>1 | 2:48026753:AA>-       | p.Lys545ArgfsX17<br>Pathogenic        | The p.Lys545ArgfsX17 variant in <i>MSH6</i> has been reported in the compound heterozygous state in 1 individual with constitutional mismatch repair deficiency (Peters 2009) and in the heterozygous state in 1 individual with colorectal cancer (Susswein 2016). Another variant affecting the same position (p.Lys545ArgfsX25) has been reported in 2 individuals with breast/endometrial cancer (Susswein 2016). It was absent from large population studies. It has also been reported in ClinVar (Variation ID 140961) and was classified as Pathogenic by several clinical labs. This variant is predicted to cause a frameshift, which alters the protein's amino acid sequence beginning at position 545 and leads to a premature termination codon 17 amino acids downstream. This alteration is then predicted to lead to a truncated or absent protein. Loss of function of the <i>MSH6</i> gene is an established disease mechanism in autosomal dominant Lynch syndrome. In summary, the p.Lys545ArgfsX17 variant meets criteria to be classified as Pathogenic for Lynch syndrome. ACMG/AMP criteria applied: PVS1, PM2, PM3. |
| <i>MSH6</i><br>1 | 2:48026928:AAA<br>G>- | p.Glu604LeufsX5<br>Pathogenic         | The p.Glu604LeufsX5 variant in <i>MSH6</i> has been reported in 1 individual with colon cancer (Ohmiya 2001) and 1 individual with Lynch syndrome (Chika 2015), and segregated with disease in 1 affected relative (Chika 2015). It has also been reported in the compound heterozygous state in an individual with early onset colorectal cancer, vitiligo and systemic lupus erythematosus (Rahner 2008). It was absent from large population studies. This variant was classified as Pathogenic on September 5, 2013 by the ClinGen-approved InSiGHT expert panel (Variation                                                                                                                                                                                                                                                                                                                                                                                                                                                                                                                                                               |



|                  |                        |                                       |                                                                                                                                                                                                                                                                                                                                                                                                                                                                                                                                                                                                                                                                                                                                                                                                                                                                                                                                                                                                                                                                                                                                                                                                                                                                                                        |
|------------------|------------------------|---------------------------------------|--------------------------------------------------------------------------------------------------------------------------------------------------------------------------------------------------------------------------------------------------------------------------------------------------------------------------------------------------------------------------------------------------------------------------------------------------------------------------------------------------------------------------------------------------------------------------------------------------------------------------------------------------------------------------------------------------------------------------------------------------------------------------------------------------------------------------------------------------------------------------------------------------------------------------------------------------------------------------------------------------------------------------------------------------------------------------------------------------------------------------------------------------------------------------------------------------------------------------------------------------------------------------------------------------------|
|                  |                        |                                       | ID 89224). This variant is predicted to cause a frameshift, which alters the protein's amino acid sequence beginning at position 604 and leads to a premature termination codon 5 amino acids downstream. This alteration is then predicted to lead to a truncated or absent protein. Loss of function of the <i>MSH6</i> gene is an established disease mechanism in autosomal dominant Lynch syndrome. In summary, the p.Glu604LeufsX5 variant meets criteria to be classified as pathogenic for Lynch syndrome. ACMG/AMP criteria applied: PVS1, PM2, PS4 supporting.                                                                                                                                                                                                                                                                                                                                                                                                                                                                                                                                                                                                                                                                                                                               |
| <i>MSH6</i><br>1 | 2:48027179:G>A         | p.Gly686Asp<br>Likely Pathogenic      | The p.Gly686Asp variant in <i>MSH6</i> has been reported in at least 5 individuals with Lynch syndrome (Yurgelun 2015, Goodfellow 2015, Thompson 2013, Hampel 2008, DeRycke 2017) and in 1 individual with breast cancer, who also carried a likely pathogenic variant in CHEK2 (Susswein 2016). It was absent from large population studies. This variant was classified as likely pathogenic on September 5, 2013 by the ClinGen-approved InSiGHT expert panel (Variation ID 89245) and several clinical labs. Computational prediction tools and conservation analyses suggest that this variant may impact the protein, and in vitro and in vivo (patient tumor) functional studies provide further evidence that this variant impacts protein function (Houllberghs 2017, Goodfellow 2015, Thompson 2013). In summary, although additional studies are required to fully establish its clinical significance, this variant meets criteria to be classified as likely pathogenic for autosomal dominant Lynch syndrome. ACMG/AMP Criteria applied: PM2, PS4 Moderate, PS3 Moderate, PP3.                                                                                                                                                                                                           |
| <i>MSH6</i><br>1 | 2:48027656:ATG<br>AA>- | p.Tyr845X<br>Likely Pathogenic        | The p.Tyr845X variant in <i>MSH6</i> has not been previously reported in individuals with Lynch Syndrome and was absent from large population studies. This nonsense variant leads to a premature termination codon at position 845, which is predicted to lead to a truncated or absent protein. Heterozygous loss of function of the <i>MSH6</i> gene is an established disease mechanism in individuals with Lynch syndrome. In summary, this variant meets criteria to be classified as likely pathogenic for autosomal dominant Lynch syndrome. ACMG/AMP criteria applied: PVS1, PM2.                                                                                                                                                                                                                                                                                                                                                                                                                                                                                                                                                                                                                                                                                                             |
| <i>MSH6</i><br>1 | 2:48027878:A>-         | p.Lys920ArgfsX25<br>Likely Pathogenic | The p.Lys920ArgfsX25 variant in <i>MSH6</i> has not been previously reported in individuals with Lynch Syndrome and was absent from large population studies. This variant has also been reported in ClinVar (Variation ID 428433). This variant is predicted to cause a frameshift, which alters the protein's amino acid sequence beginning at position 920 and leads to a premature termination codon 27 amino acids downstream. This alteration is then predicted to lead to a truncated or absent protein. Heterozygous loss of function of the <i>MSH6</i> gene is an established disease mechanism in individuals with Lynch syndrome. In summary, this variant meets criteria to be classified as likely pathogenic for autosomal dominant Lynch syndrome. ACMG/AMP criteria applied: PVS1, PM2.                                                                                                                                                                                                                                                                                                                                                                                                                                                                                               |
| <i>MSH6</i><br>1 | 2:48028096:G>T         | p.Glu992X<br>Likely Pathogenic        | The p.Glu992X variant in <i>MSH6</i> has not been previously reported in individuals with Lynch Syndrome and was absent from large population studies. This nonsense variant leads to a premature termination codon at position 992, which is predicted to lead to a truncated or absent protein. Heterozygous loss of function of the <i>MSH6</i> gene is an established disease mechanism in individuals with Lynch syndrome. In summary, this variant meets criteria to be classified as likely pathogenic for autosomal dominant Lynch syndrome. ACMG/AMP criteria applied: PVS1, PM2.                                                                                                                                                                                                                                                                                                                                                                                                                                                                                                                                                                                                                                                                                                             |
| <i>MSH6</i><br>1 | 2:48028135:C>T         | p.Arg1005X<br>Pathogenic              | The p.Arg1005X variant in <i>MSH6</i> has been previously reported in 5 individuals with colorectal cancer, 1 individual with endometrial cancer, 1 individual with multiple colorectal adenomas, and 2 individuals with Lynch syndrome, and segregated with disease in 2 affected relatives from 1 family (Colley 2005, Castillejo 2011, Plaschke 2004, De Lellis 2013, Goodfellow 2015, Adachi 2017, Pan 2019, Keranen 2018, Tanskanen 2013). It has also been identified in 1/99286 of European chromosomes by gnomAD ( <a href="http://gnomad.broadinstitute.org">http://gnomad.broadinstitute.org</a> ). This variant was classified as Pathogenic on September 5, 2013 by the ClinGen-approved InSiGHT expert panel (Variation ID 89330). This nonsense variant leads to a premature termination codon at position 1005, which is predicted to lead to a truncated or absent protein. Heterozygous loss of function of the <i>MSH6</i> gene is an established disease mechanism in individuals with Lynch syndrome. In summary, this variant meets criteria to be classified as pathogenic for autosomal dominant Lynch syndrome. ACMG/AMP criteria applied: PVS1, PM2, PS4 Moderate.                                                                                                            |
| <i>MSH6</i><br>1 | 2:48028225:C>T         | p.Arg1035X<br>Pathogenic              | The p.Arg1035X variant in <i>MSH6</i> has been previously reported in 1 individual with constitutive mismatch repair deficiency syndrome (compound heterozygous), 1 individual with pediatric CNS tumor, 1 individual with ovarian cancer and 6 individuals with endometrial cancer (1 of whom also carried a nonsense variant in BRIP1), and segregated with disease in 2 affected relatives from 2 families (Pal 2102, Norquist 2016, Planck 1999, Hendriks 2004, Devlin 2008, Planschke 2004, Ling 2018, Grobner 2018). It has also been identified in 1/18338 of East Asian and 2/112342 of European chromosomes by gnomAD ( <a href="http://gnomad.broadinstitute.org">http://gnomad.broadinstitute.org</a> ). This variant was classified as Pathogenic on September 5, 2013 by the ClinGen-approved InSiGHT expert panel (Variation ID 89338). This nonsense variant leads to a premature termination codon at position 1035, which is predicted to lead to a truncated or absent protein. Heterozygous loss of function of the <i>MSH6</i> gene is an established disease mechanism in individuals with Lynch syndrome. In summary, this variant meets criteria to be classified as pathogenic for autosomal dominant Lynch syndrome. ACMG/AMP criteria applied: PVS1, PM2, PS4 Moderate, PM3. |
| <i>MSH6</i><br>1 | 2:48028229:TG>-        | p.Phe1037LeufsX2<br>Pathogenic        | The p.Phe1037LeufsX2 variant in <i>MSH6</i> has been reported in 2 individuals with colorectal cancer and 1 individual with pancreatic cancer (Sjursen 2016, DeRycke 217, Slavin 2018). It was absent from large population studies. This variant has been reported in ClinVar (Variation ID 525755), classified as pathogenic by 1 clinical lab. This variant is predicted to cause a frameshift, which alters the protein's amino acid sequence beginning at position 1037 and leads to a premature termination codon 2 amino acids downstream. This alteration is then predicted to lead to a truncated or absent protein. Loss of function of the <i>MSH6</i> gene is an established disease mechanism in autosomal dominant Lynch syndrome. In summary, the p.Phe1037LeufsX2 variant meets criteria to be classified as pathogenic for Lynch syndrome. ACMG/AMP criteria applied: PVS1, PM2, PS4 supporting.                                                                                                                                                                                                                                                                                                                                                                                      |
| <i>MSH6</i><br>1 | 2:48030647:CT>-        | p.Phe1088LeufsX4<br>Likely Pathogenic | The p.Phe1088LeufsX4 variant in <i>MSH6</i> has not been previously reported in individuals with Lynch Syndrome or in large population studies. This variant is predicted to cause a frameshift, which alters the protein's amino acid sequence beginning at position 1088 and leads to a premature termination codon 4 amino acids downstream. This alteration is then predicted to lead to a truncated or absent protein. Heterozygous loss of function of the <i>MSH6</i> gene is an established disease mechanism in individuals with Lynch syndrome. In summary, this variant meets criteria to be classified as likely pathogenic for autosomal dominant Lynch syndrome based upon the predicted impact to the protein and absence from the general population. ACMG/AMP criteria applied: PVS1, PM2.                                                                                                                                                                                                                                                                                                                                                                                                                                                                                            |

|                  |                       |                                       |                                                                                                                                                                                                                                                                                                                                                                                                                                                                                                                                                                                                                                                                                                                                                                                                                                                                                                                                                                                                                                                                                                                                                                                                                                                                                                                                                                                                                                                                                                                                            |
|------------------|-----------------------|---------------------------------------|--------------------------------------------------------------------------------------------------------------------------------------------------------------------------------------------------------------------------------------------------------------------------------------------------------------------------------------------------------------------------------------------------------------------------------------------------------------------------------------------------------------------------------------------------------------------------------------------------------------------------------------------------------------------------------------------------------------------------------------------------------------------------------------------------------------------------------------------------------------------------------------------------------------------------------------------------------------------------------------------------------------------------------------------------------------------------------------------------------------------------------------------------------------------------------------------------------------------------------------------------------------------------------------------------------------------------------------------------------------------------------------------------------------------------------------------------------------------------------------------------------------------------------------------|
| <i>MSH6</i><br>1 | 2:48030815:->AA       | p.Met1144LysfsX2<br>Likely Pathogenic | The p.Met1144LysfsX2 variant in <i>MSH6</i> has not been previously reported in individuals with Lynch Syndrome and was absent from large population studies. This variant is predicted to cause a frameshift, which alters the protein's amino acid sequence beginning at position 1144 and leads to a premature termination codon 2 amino acids downstream. This alteration is then predicted to lead to a truncated or absent protein. Heterozygous loss of function of the <i>MSH6</i> gene is an established disease mechanism in individuals with Lynch syndrome. In summary, this variant meets criteria to be classified as likely pathogenic for autosomal dominant Lynch syndrome. ACMG/AMP criteria applied: PVS1, PM2.                                                                                                                                                                                                                                                                                                                                                                                                                                                                                                                                                                                                                                                                                                                                                                                                         |
| <i>MSH6</i><br>1 | 2:48032123:->A        | p.Arg1172LysfsX5<br>Pathogenic        | The p.Arg1172LysfsX5 variant in <i>MSH6</i> has been previously reported in at least 12 individuals with Lynch syndrome or associated cancers, and segregated with disease in 3 affected relatives from 1 family (Overbeek 2007, Plaschke 2004, Sjursen 2010, Wijnen 1999, Haraldsdottir 2017, Nilbert 2009, van der Post 2010, Jenkins 2006, Steinke 2008, Song 2014, Woods 2010, Nilbert 2009) and in 1 individual with constitutive mismatch repair deficiency in the compound heterozygous state (Soplemann 2016). It was identified in 1/35414 of Latino and in 2/129076 of European chromosomes by gnomAD ( <a href="http://gnomad.broadinstitute.org">http://gnomad.broadinstitute.org</a> ). This variant was classified as Pathogenic on September 5, 2013 by the ClinGen-approved InSiGHT expert panel (Variation ID 89404). This variant is predicted to cause a frameshift, which alters the protein's amino acid sequence beginning at position 1172 and leads to a premature termination codon 5 amino acids downstream. This alteration is then predicted to lead to a truncated or absent protein. Heterozygous loss of function of the <i>MSH6</i> gene is an established disease mechanism in individuals with Lynch syndrome. In summary, this variant meets criteria to be classified as pathogenic for autosomal dominant Lynch syndrome. ACMG/AMP criteria applied: PVS1, PS4 Moderate, PM2, PM3, PPI.                                                                                                               |
| <i>MSH6</i><br>1 | 2:48033780:C>T        | p.Arg1331X<br>Pathogenic              | The p.Arg1331X variant in <i>MSH6</i> has been reported in the heterozygous state in 6 individuals with <i>MSH6</i> -associated cancers (Stormorken 2005, Sjursen 2010, Bonadona 2011, Susswein 2015, LMM data). This variant has also been reported in 2 individuals with clinical features of constitutional mismatch repair syndrome in the compound heterozygous state with another <i>MSH6</i> variant (Plaschke 2006) or in the homozygous state (Lavoine 2015). In addition, The p.Arg1331X variant has been identified in 1/30646 South Asian chromosomes by gnomAD ( <a href="http://gnomad.broadinstitute.org">http://gnomad.broadinstitute.org</a> ). This nonsense variant leads to a premature termination codon at position 1331. This alteration occurs within the terminal 50 bases of the second to last exon and is more likely to escape nonsense mediated decay (NMD) and result in a truncated protein. Studies have demonstrated that the variant results in skipping of exon 9, giving rise to a truncated mRNA leading to drastically reduced <i>MSH6</i> protein levels, suggesting that this truncated protein is unstable (Plaschke 2006). Moreover, the p.Arg1331X variant has been classified as pathogenic on September 5, 2013 by the ClinGen-approved InSiGHT Expert Panel (ClinVar SCV000108181.2). In summary, this variant meets criteria to be classified as pathogenic for Lynch syndrome in an autosomal dominant manner. ACMG/AMP Criteria applied: PS4 Moderate, PM2, PVS1 Strong, PM3 Supporting. |
| <i>MSH6</i><br>2 | 2:48026473:T>-        | p.Phe451SerfsX2<br>Likely Pathogenic  | The p.Phe451SerfsX2 variant in <i>MSH6</i> has been reported in at least 1 individual with colorectal cancer (Shirts 2016) and was absent from large population studies. It has also been reported in ClinVar (Variation ID 224534) and classified as Pathogenic by several clinical labs. This variant is predicted to cause a frameshift, which alters the protein's amino acid sequence beginning at position 451 and leads to a premature termination codon 2 amino acids downstream. This alteration is then predicted to lead to a truncated or absent protein. Loss of function of the <i>MSH6</i> gene is an established disease mechanism in autosomal dominant Lynch syndrome. In summary, although additional studies are required to fully establish its clinical significance, the p.Phe451SerfsX2 variant meets criteria to be classified as likely pathogenic for Lynch syndrome. ACMG/AMP criteria applied: PVS1, PM2                                                                                                                                                                                                                                                                                                                                                                                                                                                                                                                                                                                                      |
| <i>MSH6</i><br>2 | 2:48027195:->A        | p.Cys694MetfsX4<br>Pathogenic         | The p.Cys694MetfsX4 variant in <i>MSH6</i> has been reported in 2 individuals with colorectal cancer (DeRycke 2017, Hansen 2017) and in 1 individual with a family history of Lynch-associated tumors (Shirts 2016). It was absent from large population studies. This variant has been reported in ClinVar (Variation ID 187516) as pathogenic by several clinical labs. This variant is predicted to cause a frameshift, which alters the protein's amino acid sequence beginning at position 694 and leads to a premature termination codon 4 amino acids downstream. This alteration is then predicted to lead to a truncated or absent protein. Loss of function of the <i>MSH6</i> gene is an established disease mechanism in autosomal dominant Lynch syndrome. In summary, the p.Cys694MetfsX4 variant meets criteria to be classified as pathogenic for Lynch syndrome. ACMG/AMP criteria applied: PVS1, PM2, PS4 supporting.                                                                                                                                                                                                                                                                                                                                                                                                                                                                                                                                                                                                    |
| <i>MSH6</i><br>2 | 2:48027269:CAG<br>T>- | p.Val717AlafsX18<br>Pathogenic        | The p.Val717AlafsX18 variant in <i>MSH6</i> has been reported in 1 individual with endometrial cancer, 2 individuals with ovarian cancer, 3 individuals with colorectal cancer and 1 individual with Lynch syndrome (Walsh 2011, Baglietto 2010, Nilbert 2009, Pal 2012, Pagin 2013, Kolodner 1999, Hirasawa 2017). It has also been identified in 1/30612 of South Asian and in 1/34584 of Latino chromosomes by gnomAD ( <a href="http://gnomad.broadinstitute.org">http://gnomad.broadinstitute.org</a> ). This variant was classified as Pathogenic on September 5, 2013 by the ClinGen-approved InSiGHT expert panel (Variation ID 89256). This variant is predicted to cause a frameshift, which alters the protein's amino acid sequence beginning at position 717 and leads to a premature termination codon 18 amino acids downstream. This alteration is then predicted to lead to a truncated or absent protein. Loss of function of the <i>MSH6</i> gene is an established disease mechanism in autosomal dominant Lynch syndrome. In summary, the p.Val717AlafsX18 variant meets criteria to be classified as pathogenic for Lynch syndrome. ACMG/AMP criteria applied: PVS1, PM2, PS4 Moderate.                                                                                                                                                                                                                                                                                                                              |
| <i>MSH6</i><br>2 | 2:48027316:C>T        | p.Arg732X<br>Pathogenic               | The p.Arg732X variant in <i>MSH6</i> has been reported in at least 5 individuals with hereditary non-polyposis colorectal cancer (HNPCC) and related tumors (Plaschke 2004, Steinke 2008, Baglietto 2010, Giraldez 2010, Song 2014) and was absent from large population studies. This nonsense variant leads to a premature termination codon at position 732, which is predicted to lead to a truncated or absent protein. Heterozygous loss-of-function of the <i>MSH6</i> gene is an established disease mechanism for Lynch syndrome. In summary, this variant meets criteria to be classified as pathogenic for Lynch syndrome in an autosomal dominant manner. ACMG/AMP Criteria applied: PM2, PVS1, PS4 Moderate.                                                                                                                                                                                                                                                                                                                                                                                                                                                                                                                                                                                                                                                                                                                                                                                                                  |
| <i>MSH6</i><br>2 | 2:48027853:C>T        | p.Arg911X<br>Pathogenic               | The p.Arg911X variant in <i>MSH6</i> has been reported in at least 13 individual with <i>MSH6</i> -associated cancers and segregated in at least 4 affected relatives (Goodfellow 2003, Buttin 2004, Hendriks 2004, Plaschke 2004, Hampel 2006, Talseth-Palmer 2010, Pal 2012, Palles 2013, Rosty                                                                                                                                                                                                                                                                                                                                                                                                                                                                                                                                                                                                                                                                                                                                                                                                                                                                                                                                                                                                                                                                                                                                                                                                                                          |

|                   |                      |                                        |                                                                                                                                                                                                                                                                                                                                                                                                                                                                                                                                                                                                                                                                                                                                                                                                                                                                                                                                                                                                                                                                                                                                                                                                                                                                                                                                                                                                                                                                                                                                                                                                                                                                                                                                                                                                                                                                                                                                                                                                                                                                                                                                                                                                                                                         |
|-------------------|----------------------|----------------------------------------|---------------------------------------------------------------------------------------------------------------------------------------------------------------------------------------------------------------------------------------------------------------------------------------------------------------------------------------------------------------------------------------------------------------------------------------------------------------------------------------------------------------------------------------------------------------------------------------------------------------------------------------------------------------------------------------------------------------------------------------------------------------------------------------------------------------------------------------------------------------------------------------------------------------------------------------------------------------------------------------------------------------------------------------------------------------------------------------------------------------------------------------------------------------------------------------------------------------------------------------------------------------------------------------------------------------------------------------------------------------------------------------------------------------------------------------------------------------------------------------------------------------------------------------------------------------------------------------------------------------------------------------------------------------------------------------------------------------------------------------------------------------------------------------------------------------------------------------------------------------------------------------------------------------------------------------------------------------------------------------------------------------------------------------------------------------------------------------------------------------------------------------------------------------------------------------------------------------------------------------------------------|
|                   |                      |                                        | 2014, Susswein 2015, Akbari 2017, Raskin 2017). This variant has also been reported in ClinVar (Variation ID 89312) and has been identified in 1/15426 European chromosomes by gnomAD ( <a href="http://gnomad.broadinstitute.org">http://gnomad.broadinstitute.org</a> ). This nonsense variant leads to a premature termination codon at position 911, which is predicted to lead to a truncated or absent protein. Heterozygous loss of function of the <i>MSH6</i> gene is an established disease mechanism in individuals with Lynch syndrome. In summary, this variant meets criteria to be classified as pathogenic for Lynch syndrome in an autosomal dominant manner. ACMG/AMP Criteria applied: PVS1; PS4; PP1; PM2.                                                                                                                                                                                                                                                                                                                                                                                                                                                                                                                                                                                                                                                                                                                                                                                                                                                                                                                                                                                                                                                                                                                                                                                                                                                                                                                                                                                                                                                                                                                          |
| <i>MSH6</i><br>2  | 2:48030623:TC>-      | p.Leu1080ValfsX12<br>Likely Pathogenic | The p.Leu1080ValfsX12 variant in <i>MSH6</i> has been reported in 1 individual with endometrial cancer (Batte 2014) and was absent from large population studies. This variant has been reported in ClinVar (Variation ID 218060), classified as pathogenic by several clinical labs. This variant is predicted to cause a frameshift, which alters the protein's amino acid sequence beginning at position 1080 and leads to a premature termination codon 12 amino acids downstream. This alteration is then predicted to lead to a truncated or absent protein. Loss of function of the <i>MSH6</i> gene is an established disease mechanism in autosomal dominant Lynch syndrome. In summary, the p.Leu1080ValfsX12 variant meets criteria to be classified as likely pathogenic for Lynch syndrome. ACMG/AMP criteria applied: PVS1, PM2.                                                                                                                                                                                                                                                                                                                                                                                                                                                                                                                                                                                                                                                                                                                                                                                                                                                                                                                                                                                                                                                                                                                                                                                                                                                                                                                                                                                                          |
| <i>MSH6</i><br>6  | 2:48030612:C>T       | p.Arg1076Cys<br>Likely Pathogenic      | The p.Arg1076Cys variant in <i>MSH6</i> has been reported in the heterozygous state in at least 12 individuals with Lynch syndrome-associated cancers (Plaschke 2004, Limburg 2011, Liccardo 2017, Rohlin 2017, Rubio 2016, Schultheis 2016, Klarskov 2011, Schofield 2009, Nilbert 2009) and in the homozygous state in 1 individual with relatively late onset colorectal cancer, suggesting that it may be a hypomorphic allele (Gardes 2012). Additionally, the p.Arg1076Cys variant has also been reported in the compound heterozygous state in 5 individuals (from four families) with clinical features of constitutional mismatch repair deficiency (Okkels 2006, Plaschke 2006, Jasperson 2011, Gardes 2012). It has also been identified in 0.03% (5/18386) of East Asian chromosomes by gnomAD ( <a href="http://gnomad.broadinstitute.org">http://gnomad.broadinstitute.org</a> ). Immunohistochemistry staining of tumor tissue samples in the majority of affected individuals showed loss of <i>MSH6</i> staining, providing evidence that the Arg1076Cys variant may impact protein function. Computational prediction tools and conservation analyses suggest that this variant may impact the protein. This variant was classified as Likely Pathogenic on March 9, 2018 by the ClinGen-approved InSiGHT expert panel (RCV000074823.4). In summary, although additional studies are required to fully establish its clinical significance, this variant meets criteria to be classified as likely pathogenic for autosomal dominant Lynch syndrome. ACMG/AMP Criteria applied: PM3, PS4_Moderate, PS3_Supporting, PP3, PM2_Supporting.                                                                                                                                                                                                                                                                                                                                                                                                                                                                                                                                                                                               |
| <i>PCSK9</i><br>1 | 1:55505604:G>A       | p.Glu32Lys<br>Pathogenic               | The p.Glu32Lys variant in <i>PCSK9</i> has been reported in >40 Japanese and Korean individuals with hypercholesterolemia, including 2 homozygous individuals and 9 double heterozygotes who had an additional pathogenic variant in <i>LDLR</i> (Miyake 2008, Mabuchi 2011, Noguchi 2010, Mabuchi 2014, Han 2015, Hopkins 2015, ClinVar; variation ID: 297692). Homozygotes and double heterozygotes had more severe disease on average than heterozygotes, and heterozygotes for this variant had milder disease than heterozygotes for other variants associated to familial hypercholesterolemia (FH; Mabuchi 2014, Hopkins 2015). Additionally, this variant segregated with disease in >20 affected relatives from >5 families (Noguchi 2010, Mabuchi 2014). In vitro functional studies provide some evidence that the p.Glu32Lys variant may impact protein function (Noguchi 2010). This variant has also been identified in 4/12338 East Asian chromosomes by gnomAD ( <a href="http://gnomad.broadinstitute.org/">http://gnomad.broadinstitute.org/</a> ). This frequency is low enough to be consistent with the frequency of FH in the general population. In summary, the p.Glu32Lys variant meets criteria to be classified as pathogenic for autosomal dominant familial hypercholesterolemia based upon presence in multiple affected individuals and segregation with disease. The ACMG/AMP Criteria applied: PS4, PP1 Strong, PS3 Supporting.                                                                                                                                                                                                                                                                                                                                                                                                                                                                                                                                                                                                                                                                                                                                                                                        |
| <i>PCSK9</i><br>1 | 1:55523127:G>T       | p.Asp374Tyr<br>Pathogenic              | The p.Asp374Tyr variant in <i>PCSK9</i> has been reported in at least 12 individuals with hypercholesterolemia and segregated with disease in at least 9 affected individuals from 1 family (Timms 2004, Humphries 2009, Kaya 2017). It was absent from large population studies, but has been reported in ClinVar (Variation ID: 2875). Computational prediction tools and conservation analysis are consistent with pathogenicity. In vitro functional studies support an impact on protein function (Benjannet 2004, Bottomley 2009, Al-Mashhadi 2013). In summary, this variant meets criteria to be classified as pathogenic for autosomal dominant hypercholesterolemia. ACMG/AMP Criteria applied: PP1_Strong, PM2, PS4_Moderate, PP3, PS3_Supporting.                                                                                                                                                                                                                                                                                                                                                                                                                                                                                                                                                                                                                                                                                                                                                                                                                                                                                                                                                                                                                                                                                                                                                                                                                                                                                                                                                                                                                                                                                           |
| <i>PCSK9</i><br>5 | 1:55524303:C>T       | p.Arg496Trp<br>Likely Pathogenic       | The p.Arg496Trp variant in <i>PCSK9</i> has been reported in the heterozygous state in >25 individuals with hypercholesterolemia or primary dyslipidemia, the majority of whom were from Turkey or the Netherlands, and segregated with disease in 1 affected individual (Bertolini 2013, Hopkins 2015, Ohta 2016, Kaya 2017, Martin-Campos 2018, Eroglu 2018, Invitae pers. comm., GeneDx pers. comm.). In addition, it was identified in an individual with a severe presentation who also carried a pathogenic variant in <i>LDLR</i> . His affected mother also carried the <i>PCSK9</i> variant (Pisciotta 2006). It has been seen in the homozygous state in 2 individuals with hypercholesterolemia (Kaya 2017, Eroglu 2018, Invitae pers. comm.). A case control study of Turkish individuals showed that individuals carrying this variant were statistically more likely to be affected with primary dyslipidemia compared to controls and had a 12.8-fold higher triglyceride levels compared to controls (Eroglu 2018). This variant has also been identified in 0.026% (8/30508) of South Asian chromosomes and 0.003% (4/126638) of European chromosomes by gnomAD ( <a href="http://gnomad.broadinstitute.org">http://gnomad.broadinstitute.org</a> ) and has been reported in ClinVar (Variation ID 201129). An in vitro functional studies showed a modest gain of function impact (Fasano 2009) and 2 additional studies did not demonstrate a significant functional change (Pisciotta 2006, Ly 2014); however, these types of assays may not accurately represent biological function. Computational prediction tools and conservation analyses do not provide strong support for or against an impact to the protein and 1 mammal carries Tryptophan (Trp) at this position with high nearby conservation. In summary, although additional studies are required to fully establish its clinical significance particularly because the allele frequency of this variant in the South Asian population of gnomAD is relatively high and functional studies are unclear, this variant meets criteria to be classified as likely pathogenic for autosomal dominant familial hypercholesterolemia. ACMG/AMP Criteria applied: PS4, PM3. |
| <i>PMS2</i><br>1  | 7:6035204:CTGT><br>- | p.Arg287SerfsX19<br>Pathogenic         | The p.Arg287SerfsX19 variant in <i>PMS2</i> has been reported in at least 5 individuals with <i>PMS2</i> -associated cancers in the heterozygous state and segregated with disease in at least 1 affected relative (Rohlin 2017, Suerink 2016, Yurgelun 2015, Moline 2013, Senter 2008, Hendriks 2006). This variant has been identified in 1/24960 African and in 1/129158 European chromosomes by gnomAD ( <a href="http://gnomad.broadinstitute.org">http://gnomad.broadinstitute.org</a> ) and                                                                                                                                                                                                                                                                                                                                                                                                                                                                                                                                                                                                                                                                                                                                                                                                                                                                                                                                                                                                                                                                                                                                                                                                                                                                                                                                                                                                                                                                                                                                                                                                                                                                                                                                                      |

|                  |               |                                       |                                                                                                                                                                                                                                                                                                                                                                                                                                                                                                                                                                                                                                                                                                                                                                                                                                                                                                                                                                                                                     |
|------------------|---------------|---------------------------------------|---------------------------------------------------------------------------------------------------------------------------------------------------------------------------------------------------------------------------------------------------------------------------------------------------------------------------------------------------------------------------------------------------------------------------------------------------------------------------------------------------------------------------------------------------------------------------------------------------------------------------------------------------------------------------------------------------------------------------------------------------------------------------------------------------------------------------------------------------------------------------------------------------------------------------------------------------------------------------------------------------------------------|
|                  |               |                                       | was classified as pathogenic on September 5, 2013 by the ClinGen-approved inSIGHT expert panel (ClinVar ID 91375). This variant is predicted to cause a frameshift, which alters the protein's amino acid sequence beginning at position 287 and leads to a premature termination codon 19 amino acids downstream. This alteration is then predicted to lead to a truncated or absent protein. Loss of function of the <i>PMS2</i> gene is an established disease mechanism in autosomal dominant Lynch syndrome. In summary, this variant meets criteria to be classified as pathogenic for autosomal dominant Lynch syndrome. ACMG/AMP Criteria applied: PVS1, PM2, PS4 Moderate.                                                                                                                                                                                                                                                                                                                                 |
| <i>PMS2</i><br>1 | 7:6038884:->C | p.Val187GlyfsX62<br>Likely Pathogenic | The p.Val187GlyfsX62 variant in <i>PMS2</i> has not been previously reported in individuals with Lynch syndrome and was absent from large population studies. This variant is predicted to cause a frameshift, which alters the protein's amino acid sequence beginning at position 187 and leads to a premature termination codon 62 amino acids downstream. This alteration is then predicted to lead to a truncated or absent protein. Loss of function of the <i>PMS2</i> gene is an established disease mechanism in autosomal dominant Lynch syndrome. In summary, although additional studies are required to fully establish its clinical significance, this variant meets criteria to be classified as likely pathogenic for autosomal dominant Lynch syndrome. ACMG/AMP Criteria applied: PVS1, PM2.                                                                                                                                                                                                      |
| <i>PMS2</i><br>2 | 7:6029554:T>- | p.Arg341GlyfsX15<br>Pathogenic        | The p.Arg341GlyfsX15 variant in <i>PMS2</i> has been identified in at least 1 individual with <i>PMS2</i> -associated cancer and segregated with the disease in 2 affected family members (one with endometrial cancer and one with colon polyps; Worthley 2005). This variant was absent from large population studies. This variant is predicted to cause a frameshift, which alters the protein's amino acid sequence beginning at position 341 and leads to a premature termination codon 15 amino acids downstream. This alteration is then predicted to lead to a truncated or absent protein. Heterozygous loss of function of the <i>PMS2</i> gene is an established disease mechanism in Lynch syndrome. In summary, this variant meets criteria to be classified as pathogenic for Lynch syndrome in an autosomal dominant manner based upon predicted impact to the protein. ACMG/AMP Criteria applied: PM2, PVS1.                                                                                       |
| <i>PMS2</i><br>2 | 7:6035245:G>A | p.Gln275X<br>Pathogenic               | The p.Gln275X variant in <i>PMS2</i> has been reported in at least 4 heterozygous individuals with <i>PMS2</i> -associated cancers and in 1 compound heterozygous individual with constitutive mismatch repair deficiency (Espenschied 2017, Susswein 2016, Suerink 2016, Hansen 2014, Vaughn 2013, Yeung 2013). This variant has been identified in 2/34590 of Latino chromosomes by gnomAD ( <a href="http://gnomad.broadinstitute.org">http://gnomad.broadinstitute.org</a> ) and has been reported in ClinVar (pathogenic by several clinical labs (ClinVar ID 127796)). This nonsense variant leads to a premature termination codon at position 275, which is predicted to lead to a truncated or absent protein. Loss of function of the <i>PMS2</i> gene is an established disease mechanism in autosomal dominant Lynch syndrome. In summary, this variant meets criteria to be classified as pathogenic for autosomal dominant Lynch syndrome. ACMG/AMP Criteria applied: PVS1, PM2, PS4 Supporting, PM3. |
| <i>PMS2</i><br>2 | 7:6038747:G>A | p.Gln233X<br>Pathogenic               | The p.Gln233X variant in <i>PMS2</i> has been previously reported in >15 individuals with <i>PMS2</i> -associated cancers (Rossi 2017, van der Klift 2016, Susswein 2016, Suerink 2016, ten Broeke 2015, Niessen 2009) and has been detected in 3/129188 of European chromosomes by gnomAD ( <a href="https://gnomad.broadinstitute.org">https://gnomad.broadinstitute.org</a> ). This variant was classified as Pathogenic on September 5, 2013 by the ClinGen-approved InSiGHT expert panel (Variation ID 91362). This nonsense variant leads to a premature termination codon at position 233, which is predicted to lead to a truncated or absent protein. Loss of function of the <i>PMS2</i> gene is an established disease mechanism in autosomal dominant Lynch syndrome. In summary, this variant meets criteria to be classified as pathogenic for autosomal dominant Lynch syndrome. ACMG/AMP Criteria applied: PVS1, PM2, PS4.                                                                          |

**eTable 3.** Baseline Characteristics of Familial Hypercholesterolemia Variant Carriers and Noncarriers

| <b>Familial Hypercholesterolemia</b>                  | <b>Carriers<br/>(N = 131)</b> | <b>Noncarriers<br/>(N = 49607)</b> | <b>P Value</b> |
|-------------------------------------------------------|-------------------------------|------------------------------------|----------------|
| <b>Age at enrollment, (years)</b>                     | 56.9 (8.1)                    | 57.1 (8.0)                         | 0.86           |
| <b>Male sex</b>                                       | 45 (34.4)                     | 22,549 (45.5)                      | 0.01           |
| <b>Race</b>                                           |                               |                                    | 0.95           |
| <b>White</b>                                          | 122 (93.1)                    | 46,330 (93.4)                      |                |
| <b>Asian</b>                                          | 4 (3.1)                       | 1,229 (2.5)                        |                |
| <b>Black</b>                                          | 2 (1.5)                       | 1,005 (2.0)                        |                |
| <b>Other</b>                                          | 3 (2.3)                       | 1,043 (2.1)                        |                |
| <b>History of hypertension</b>                        | 44 (35.2)                     | 13,824 (29.4)                      | 0.18           |
| <b>Ever smoked</b>                                    | 57 (43.5)                     | 21,981 (44.4)                      | 0.90           |
| <b>Body mass index</b>                                | 27.8 (5.4)                    | 27.4 (4.8)                         | 0.34           |
| <b>Family history</b>                                 | 87 (66.4)                     | 22831 (46.0)                       | <0.001         |
| <b>Taking statin or ezetimibe</b>                     | 75 (57.3)                     | 8745 (17.6)                        | <0.001         |
| <b>Total cholesterol, (mg/dL)</b>                     | 243.7 (66.6)                  | 219.5 (43.8)                       | <0.001         |
| <b>LDL cholesterol, (mg/dL)</b>                       | 159.9 (49.6)                  | 136.5 (33.2)                       | <0.001         |
| <b>Triglycerides, (mg/dL)</b>                         | 113.9 [82.6, 169.7]           | 128.1 [90.9, 183.6]                | 0.02           |
| <b>HDL cholesterol, (mg/dL)</b>                       | 56.0 (13.9)                   | 56.9 (14.9)                        | 0.48           |
| <b>Estimated Untreated total cholesterol, (mg/dL)</b> | 279.3 (61.8)                  | 227.9 (42.0)                       | <0.001         |
| <b>Estimated Untreated LDL cholesterol, (mg/dL)</b>   | 198.0 (49.9)                  | 145.0 (32.8)                       | <0.001         |
| <b>Estimated Untreated triglycerides, (mg/dL)</b>     | 121.1 [90.7, 181.3]           | 131.7 [92.9, 191.0]                | 0.21           |
| <b>Estimated Untreated HDL cholesterol, (mg/dL)</b>   | 56.1 (13.8)                   | 57.0 (14.9)                        | 0.55           |
| <b>Severe hypercholesterolemia</b>                    | 62 (52.5)                     | 4,044 (8.7)                        | <0.001         |

Characteristics of carriers and noncarriers of pathogenic or likely pathogenic mutations in genes associated with familial hypercholesterolemia. Comparison of background variables between carriers of the variants of interest and noncarriers was performed with the analysis of variance (ANOVA) for continuous variables, chi-squared test for categorical variables, and the Kruskal-Wallis test for non-normally distributed measurement variables; values represent mean (standard deviation), n (% of individuals), or median [interquartile range], respectively. SI conversion factor: To convert cholesterol to mmol/L, multiply values by 0.0259. To convert triglyceride levels to mmol/l, multiple values by 0.01129. Family history is defined as known history of heart disease in a first degree relative. Severe hypercholesterolemia is defined as estimated untreated LDL-C greater than or equal to 190 mg/dL.

**eTable 4.** Baseline Characteristics of Women Hereditary Breast and Ovarian Cancer Syndrome Variant Carriers and Noncarriers

| <b>Hereditary Breast and Ovarian Cancer Syndrome</b> | <b>Carriers<br/>(N = 116)</b> | <b>Noncarriers<br/>(N = 27,028)</b> | <b>P Value</b> |
|------------------------------------------------------|-------------------------------|-------------------------------------|----------------|
| <b>Age at enrollment, (years)</b>                    | 56.3 (7.5)                    | 56.6 (8.0)                          | 0.63           |
| <b>Race</b>                                          |                               |                                     | 0.83           |
| <b>White</b>                                         | 107 (92.2)                    | 25,151 (93.1)                       |                |
| <b>Asian</b>                                         | 4 (3.4)                       | 620 (2.3)                           |                |
| <b>Black</b>                                         | 2 (1.7)                       | 628 (2.3)                           |                |
| <b>Other</b>                                         | 3 (2.6)                       | 629 (2.3)                           |                |
| <b>History of menopause</b>                          | 75 (74.3)                     | 15,920 (70.5)                       | 0.48           |
| <b>Age at menopause, (years)</b>                     | 46.4 (11.1)                   | 46.8 (13.1)                         | 0.80           |
| <b>History of hormone replacement therapy</b>        | 35 (30.7)                     | 10,161 (37.7)                       | 0.15           |
| <b>History of taking oral contraception</b>          | 97 (84.3)                     | 22,370 (82.9)                       | 0.78           |
| <b>Age at first live birth, (years)</b>              | 25.5 (4.6)                    | 25.7 (4.9)                          | 0.82           |
| <b>Number of live births</b>                         | 2.0 [1.0, 2.0]                | 2.0 [1.0, 2.0]                      | 0.96           |
| <b>Nullipara</b>                                     | 23 (19.8)                     | 5,452 (20.2)                        | 1              |
| <b>Body mass index</b>                               | 27.7 (5.1)                    | 27.1 (5.2)                          | 0.20           |
| <b>Family history</b>                                | 26 (22.4)                     | 3,299 (12.2)                        | 0.001          |
| <b>Screening mammography before age 50</b>           | 12 (48.0)                     | 1,771 (27.5)                        | 0.04           |

Characteristics of carriers and noncarriers of pathogenic or likely pathogenic mutations in genes associated with hereditary breast and ovarian cancer syndrome in women. Comparison of background variables between carriers of the variants of interest and noncarriers was performed with the analysis of variance (ANOVA) for continuous variables, chi-squared test for categorical variables, and the Kruskal-Wallis test for non-normally distributed measurement variables; values represent mean (standard deviation), n (% of individuals), or median [interquartile range], respectively. Family history is defined as known history of breast cancer in a first degree relative.

**eTable 5.** Baseline Characteristics of Lynch Syndrome Variant Carriers and Noncarriers

| Lynch Syndrome                            | Carriers<br>(N = 76) | Noncarriers<br>(N = 49,662) | P Value |
|-------------------------------------------|----------------------|-----------------------------|---------|
| Age at enrollment, (years)                | 58.1 (7.6)           | 57.1 (8.0)                  | 0.28    |
| Male sex                                  | 33 (43.4)            | 22,561 (45.4)               | 0.81    |
| Race                                      |                      |                             | 0.95    |
| White                                     | 71 (93.4)            | 46,381 (93.4)               |         |
| Asian                                     | 2 (2.6)              | 1,231 (2.5)                 |         |
| Black                                     | 2 (2.6)              | 1,005 (2.0)                 |         |
| Other                                     | 1 (1.3)              | 1,045 (2.1)                 |         |
| Body mass index                           | 26.6 (4.2)           | 27.4 (4.8)                  | 0.15    |
| Ever smoked                               | 32 (42.7)            | 22,006 (44.4)               | 0.85    |
| Family history                            | 28 (36.8)            | 5,978 (12.0)                | <0.001  |
| Processed meat intake, (servings/week)    | 2.0 [1.0, 3.0]       | 2.0 [1.0, 3.0]              | 0.79    |
| Total whole grain intake, (servings/week) | 10.0 [4.0, 17.5]     | 10.0 [5.0, 17.0]            | 0.88    |
| Bowel cancer screening before age 50      | 4 (26.7)             | 1,414 (12.6)                | 0.21    |

Characteristics of carriers and noncarriers of pathogenic or likely pathogenic mutations in genes associated with Lynch syndrome. Comparison of background variables between carriers of the variants of interest and noncarriers was performed with the analysis of variance (ANOVA) for continuous variables, chi-squared test for categorical variables, and the Kruskal-Wallis test for non-normally distributed measurement variables; values represent mean (standard deviation), n (% of individuals), or median [interquartile range], respectively. Family history is defined as known history of bowel cancer in a first degree relative.

**eTable 6.** Familial Hypercholesterolemia, Hazard Ratios for Each Component of the Composite End Point

| Disease                   | Affected Carriers (%) | Affected Noncarriers (%) | Hazard Ratio | 95% CI        | P-Value |
|---------------------------|-----------------------|--------------------------|--------------|---------------|---------|
| Coronary Artery Disease   | 25 (19.1%)            | 3692 (7.4%)              | 3.50         | [2.36; 5.18]  | <0.0001 |
| Ischemic Stroke           | 5 (3.8%)              | 969 (2%)                 | 2.17         | [0.90; 5.22]  | 0.085   |
| Peripheral Artery Disease | 7 (5.3%)              | 576 (1.2%)               | 5.43         | [2.57; 11.44] | <0.0001 |

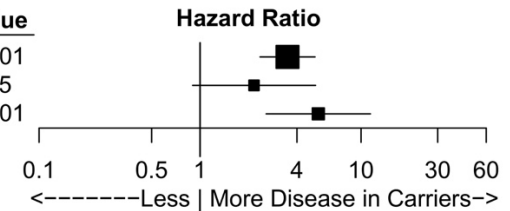

Hazard ratios with corresponding 95% confidence intervals and P values for primary disease endpoints of familial hypercholesterolemia, comparing carriers to noncarriers calculated using Cox proportional-hazards model with covariates of enrollment age, sex, and genetic ancestry as quantified by the first four genetic principal components.<sup>18</sup>



**eTable 7.** Hereditary Breast and Ovarian Cancer Syndrome, Hazard Ratios for Primary Cancers

| Disease              | Affected Carriers (%) | Affected Noncarriers (%) | Hazard Ratio | 95% CI        | P-Value |
|----------------------|-----------------------|--------------------------|--------------|---------------|---------|
| Breast Cancer        | 28 (24.1%)            | 1902 (7%)                | 3.84         | [2.64; 5.58]  | <0.0001 |
| Ovarian Cancer       | 6 (5.2%)              | 196 (0.7%)               | 7.59         | [3.37; 17.12] | <0.0001 |
| Prostate Cancer      | 15 (12.6%)            | 1137 (5.1%)              | 2.88         | [1.73; 4.79]  | <0.0001 |
| Pancreatic Cancer    | 1 (0.4%)              | 89 (0.2%)                | 2.48         | [0.34; 17.78] | 0.367   |
| Esophageal Cancer    | 0 (0%)                | 107 (0.2%)               | 0.00         | [0.00; Inf]   | 0.993   |
| Stomach Cancer       | 0 (0%)                | 95 (0.2%)                | 0.00         | [0.00; Inf]   | 0.993   |
| Hepatobiliary Cancer | 0 (0%)                | 79 (0.2%)                | 0.00         | [0.00; Inf]   | 0.994   |

  

Hazard ratios with corresponding 95% confidence intervals and P values for primary disease endpoints related to hereditary breast and ovarian cancer syndrome, comparing carriers to noncarriers calculated using Cox proportional-hazards model with covariates of enrollment age, sex, and genetic ancestry as quantified by the first four genetic principal components.

**eTable 8.** Lynch Syndrome, Hazard Ratios for Primary Cancers

| Disease                          | Affected Carriers (%) | Affected Noncarriers (%) | Hazard Ratio | 95% CI        | P-Value | Hazard Ratio |
|----------------------------------|-----------------------|--------------------------|--------------|---------------|---------|--------------|
| Colorectal Cancer                | 14 (18.4%)            | 673 (1.4%)               | 15.59        | [9.18; 26.49] | <0.0001 |              |
| Uterine Cancer                   | 5 (11.6%)             | 259 (1%)                 | 10.72        | [4.42; 26.00] | <0.0001 |              |
| Esophageal Cancer                | 1 (1.3%)              | 106 (0.2%)               | 6.53         | [0.91; 46.80] | 0.062   |              |
| Stomach Cancer                   | 2 (2.6%)              | 93 (0.2%)                | 14.34        | [3.53; 58.25] | <0.0001 |              |
| Small Bowel Cancer               | 0 (0%)                | 54 (0.1%)                | 0.00         | [0.00; Inf]   | 0.995   |              |
| Hepatobiliary Cancer             | 0 (0%)                | 79 (0.2%)                | 0.00         | [0.00; Inf]   | 0.994   |              |
| Pancreatic Cancer                | 0 (0%)                | 90 (0.2%)                | 0.00         | [0.00; Inf]   | 0.994   |              |
| Kidney Cancer                    | 1 (1.3%)              | 180 (0.4%)               | 3.72         | [0.52; 26.55] | 0.19    |              |
| Lower Genitourinary Tract Cancer | 0 (0%)                | 170 (0.3%)               | 0.00         | [0.00; Inf]   | 0.992   |              |
| Breast Cancer                    | 2 (4.7%)              | 1928 (7.1%)              | 0.56         | [0.14; 2.23]  | 0.408   |              |
| Ovarian Cancer                   | 1 (2.3%)              | 201 (0.7%)               | 2.57         | [0.36; 18.39] | 0.347   |              |
| Prostate Cancer                  | 0 (0%)                | 1152 (5.1%)              | 0.00         | [0.00; Inf]   | 0.976   |              |
| Melanoma                         | 0 (0%)                | 779 (1.6%)               | 0.00         | [0.00; Inf]   | 0.982   |              |
| Non-melanoma Skin Cancer         | 4 (5.3%)              | 2829 (5.7%)              | 0.87         | [0.33; 2.33]  | 0.788   |              |

Hazard ratios with corresponding 95% confidence intervals and P values for primary disease endpoints related to Lynch syndrome, comparing carriers to noncarriers calculated using Cox proportional-hazards model with covariates of enrollment age, sex, and genetic ancestry as quantified by the first four genetic principal components.

**eTable 9.** Prevalence and Clinical Importance of Pathogenic or Likely Pathogenic Variants for 3 Genomic Conditions Stratified by Gene

| Disease                                       | Gene         | Affected Carriers (%) | Affected Noncarriers(%) | Hazard Ratio | 95% CI         | P-Value | Hazard Ratio |
|-----------------------------------------------|--------------|-----------------------|-------------------------|--------------|----------------|---------|--------------|
| <i>Atherosclerotic Cardiovascular Disease</i> | Total        | (28 / 131) 21.4%      | (4663 / 49607) 9.4%     | 3.03         | [ 2.09; 4.40]  | <0.0001 |              |
|                                               | <i>APOB</i>  | (11 / 40) 27.5%       | (4680 / 49698) 9.4%     | 4.58         | [ 2.53; 8.28]  | <0.0001 |              |
|                                               | <i>LDLR</i>  | (15 / 83) 18.1%       | (4676 / 49655) 9.4%     | 2.39         | [ 1.44; 3.96]  | 0.001   |              |
|                                               | <i>PCSK9</i> | (2 / 7) 28.6%         | (4689 / 49731) 9.4%     | 3.84         | [ 0.96; 15.37] | 0.057   |              |
| <i>Breast and Ovarian Cancer</i>              | Total        | (32 / 235) 13.6%      | (2098 / 49503) 4.2%     | 4.07         | [ 2.87; 5.77]  | <0.0001 |              |
|                                               | <i>BRCA1</i> | (7 / 59) 11.9%        | (2123 / 49679) 4.3%     | 4.07         | [ 1.94; 8.54]  | <0.0001 |              |
|                                               | <i>BRCA2</i> | (25 / 176) 14.2%      | (2105 / 49562) 4.2%     | 4.05         | [ 2.73; 6.01]  | <0.0001 |              |
| <i>Colorectal and Uterine Cancer</i>          | Total        | (17 / 76) 22.4%       | (929 / 49662) 1.9%      | 12.77        | [ 7.90; 20.64] | <0.0001 |              |
|                                               | <i>MLH1</i>  | (10 / 19) 52.6%       | (936 / 49719) 1.9%      | 43.90        | [23.49; 82.04] | <0.0001 |              |
|                                               | <i>MSH2</i>  | (1 / 6) 16.7%         | (945 / 49732) 1.9%      | 9.55         | [ 1.34; 68.01] | 0.024   |              |
|                                               | <i>MSH6</i>  | (6 / 43) 14%          | (940 / 49695) 1.9%      | 7.35         | [ 3.29; 16.40] | <0.0001 |              |
|                                               | <i>PMS2</i>  | (0 / 8) 0%            | (946 / 49730) 1.9%      | 0.00         | [ 0.00; Inf]   | 0.984   |              |

Hazard ratios with corresponding 95% confidence intervals and P values for disease comparing carriers to noncarriers calculated using Cox proportional-hazards model with covariates of enrollment age, sex, and genetic ancestry as quantified by the first four genetic principal components, for all individuals with genomic condition and stratified by individual gene component. Heterogeneity in risk based on gene was observed among the Lynch syndrome variants ( $p=0.006$ ), but not in familial hypercholesterolemia ( $p=0.25$ ) or hereditary breast and ovarian cancer ( $p=0.99$ ).

**eFigure 1.** Frequency of Carriers of Pathogenic or Likely Pathogenic Variants, for Each of 3 Genomic Conditions According to Gene

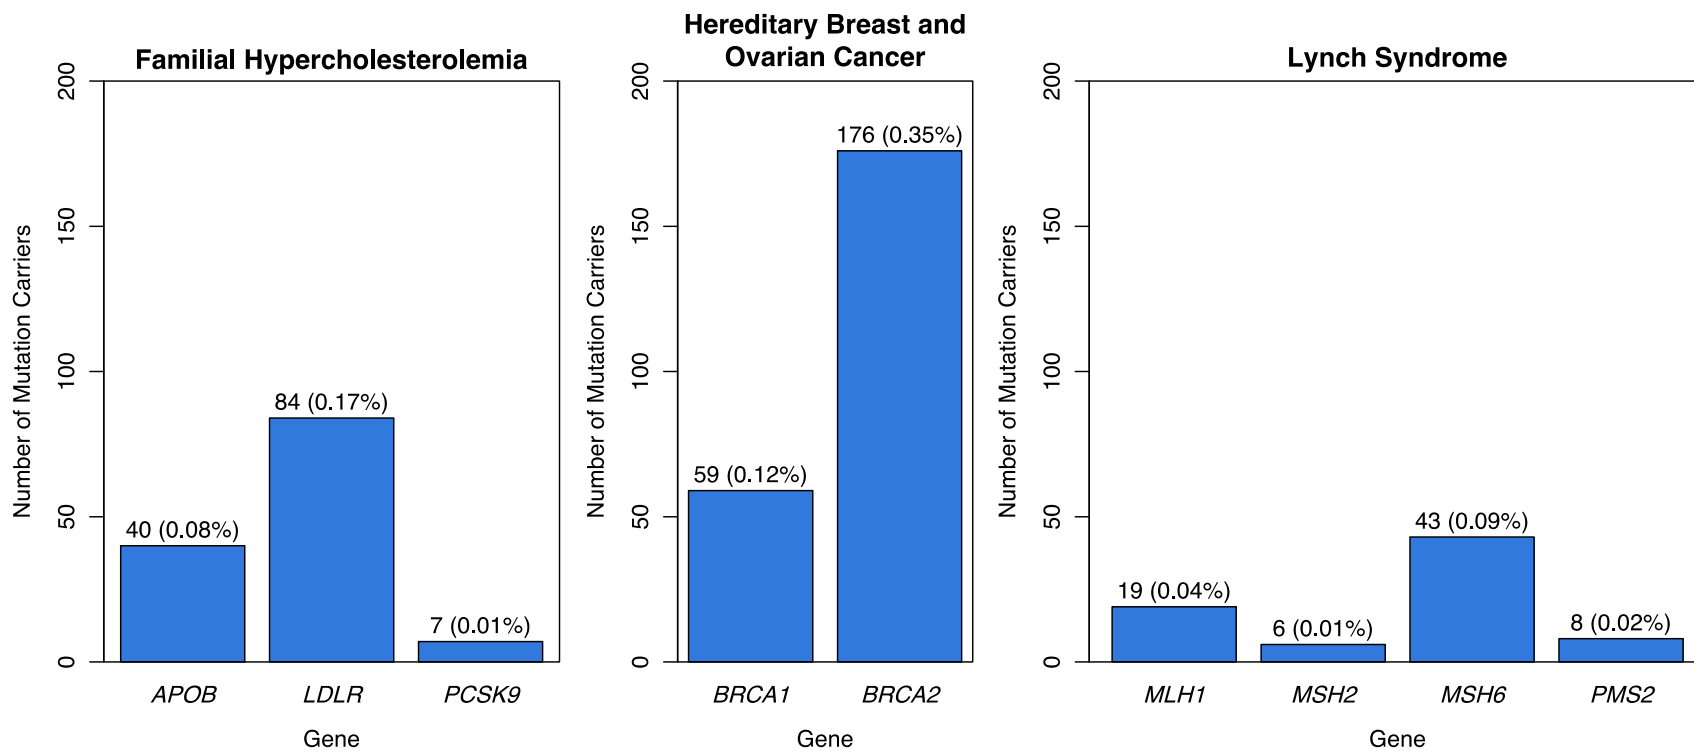

Number of individuals carrying pathogenic or likely pathogenic mutations in *APOB*, *LDLR*, *PCSK9*, *BRCA1*, *BRCA2*, *MLH1*, *MSH2*, *MSH6*, and *PMS2*, with percentages out of 49,738 individuals in UK Biobank with exome sequencing data.

**eFigure 2.** Observed and Estimated Untreated Low-Density Lipoprotein Cholesterol Levels According to Familial Hypercholesterolemia Variant Status

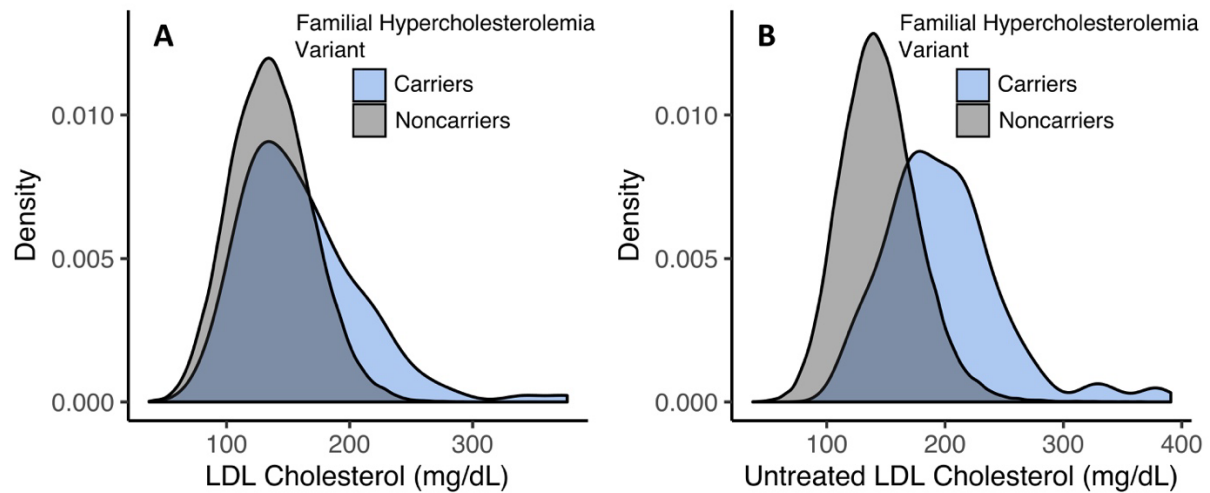

A: Distribution of low-density lipoprotein (LDL) cholesterol among carriers (mean 161 mg/dL) and noncarriers (mean 137 mg/dL) of a familial hypercholesterolemia variant. B: Distribution of estimated untreated LDL cholesterol among carriers (mean 198 mg/dL) and noncarriers (mean 145 mg/dL) of a familial hypercholesterolemia variant, based on adjustment for average effect of any cholesterol-lowering therapies reported in each individual (eTable 1 in Supplement).

**eFigure 3.** Age-Dependent Cumulative Probability of Disease According to Pathogenic or Likely Pathogenic Variant Carrier Status

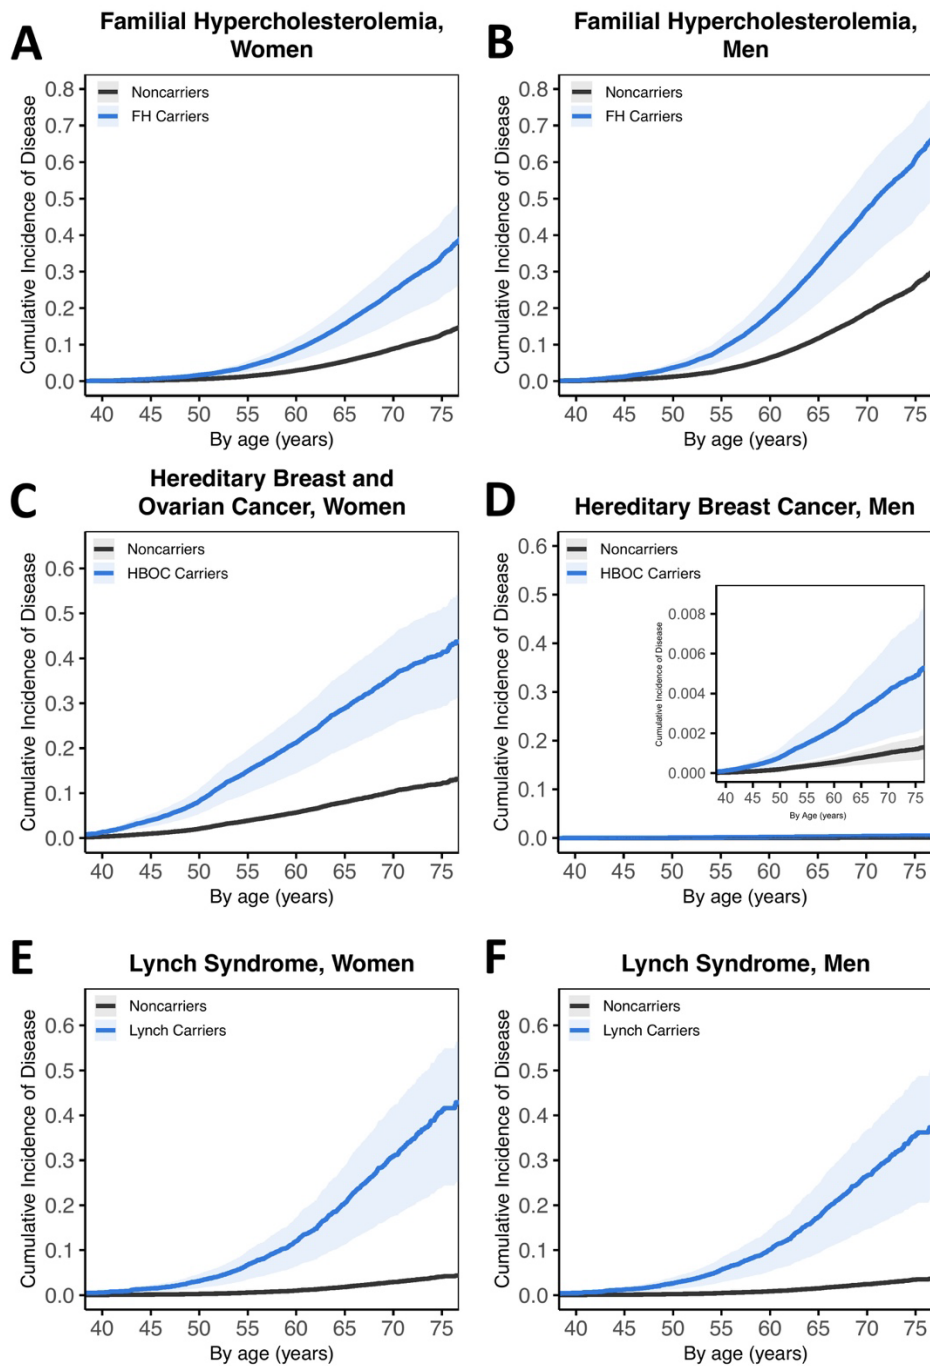

Age-dependent cumulative probability of disease according to pathogenic or likely pathogenic variant carrier status. Age-dependent cumulative probability estimated using Cox proportional-hazards model, standardized to the average of the first four genetic principal components and sex and stratified by respective variant carrier status for familial hypercholesterolemia (coronary artery disease, stroke, or peripheral artery disease, A, B), hereditary breast and ovarian cancer (C, D), and Lynch syndrome (colorectal and uterine cancer, E, F) in women and men, respectively.

**eFigure 4.** Predicted Risk of Disease at ages 55, 65, and 75 According to Pathogenic or Likely Pathogenic Variant Carrier Status and Family History

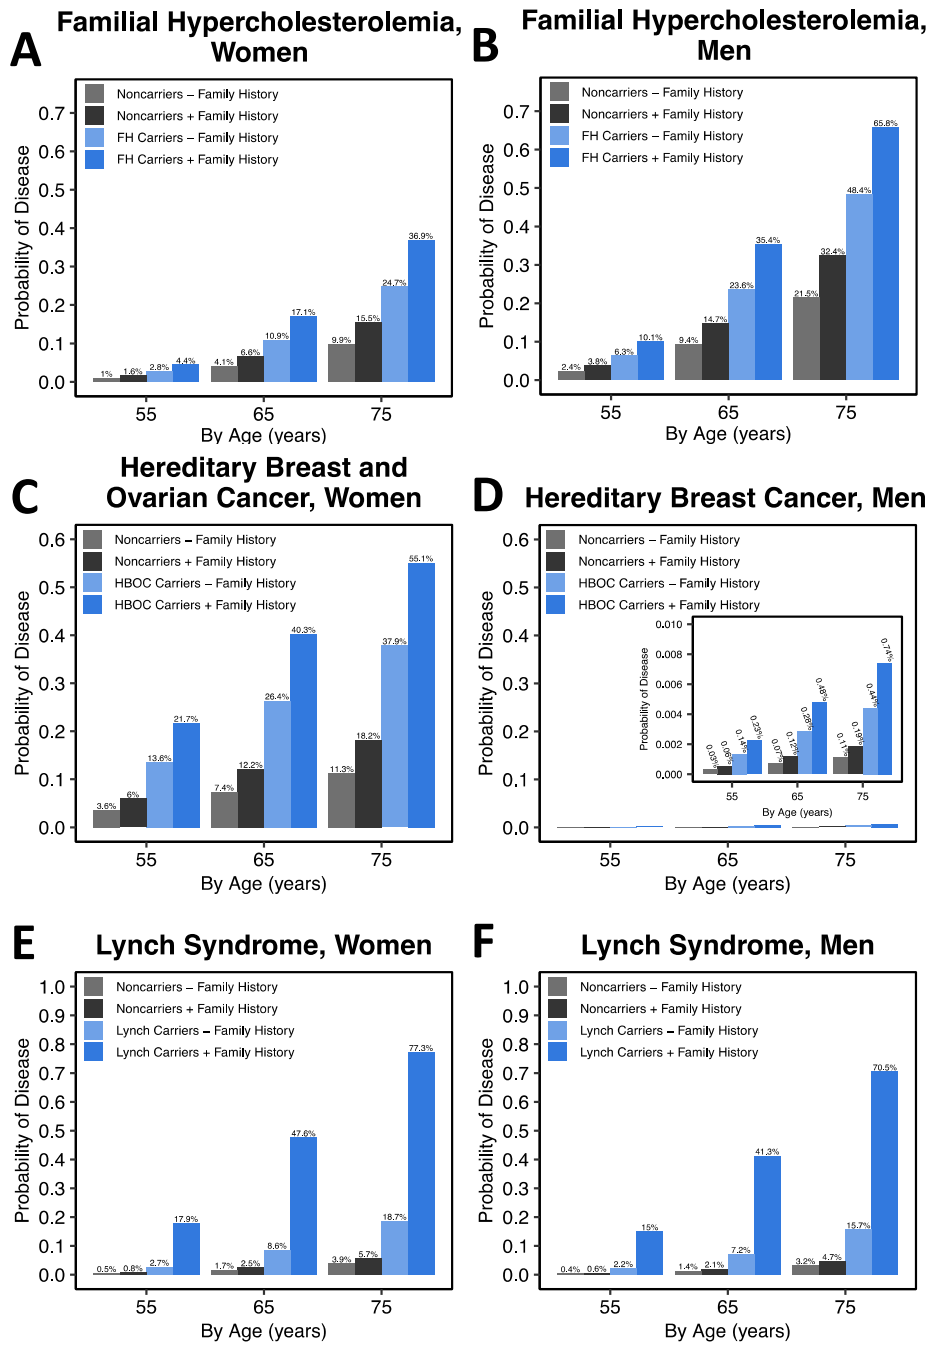

Cumulative probability of developing disease at ages 55, 65, and 75 years, estimated using Cox proportional-hazards model, standardized to the average of the first four genetic principal components, sex, family history, and family history-carrier status interaction (if significant) and stratified by variant carrier status and family history for familial hypercholesterolemia (coronary artery disease, stroke, or peripheral artery disease, A, B), hereditary breast and ovarian cancer (C, D), and Lynch syndrome (colorectal and uterine cancer, E, F) in women and men, respectively. The p-values for interaction between family history and carrier status were  $p=0.08$  for familial hypercholesterolemia,  $p=0.20$  for hereditary breast and ovarian cancer syndrome, and  $p=0.003$  for Lynch syndrome.

## eReferences.

1. Van Hout CV, Tachmazidou I, Backman JD, et al. *Whole Exome Sequencing and Characterization of Coding Variation in 49,960 Individuals in the UK Biobank*. *Genomics*; 2019. doi:10.1101/572347
2. Bycroft C, Freeman C, Petkova D, et al. The UK Biobank resource with deep phenotyping and genomic data. *Nature*. 2018;562(7726):203-209. doi:10.1038/s41586-018-0579-z
3. Sudlow C, Gallacher J, Allen N, et al. UK biobank: an open access resource for identifying the causes of a wide range of complex diseases of middle and old age. *PLoS Med*. 2015;12(3):e1001779. doi:10.1371/journal.pmed.1001779
4. Li H, Durbin R. Fast and accurate short read alignment with Burrows–Wheeler transform. *Bioinformatics*. 2009;25(14):1754-1760. doi:10.1093/bioinformatics/btp324
5. Regier AA, Farjoun Y, Larson DE, et al. Functional equivalence of genome sequencing analysis pipelines enables harmonized variant calling across human genetics projects. *Nat Commun*. 2018;9(1):4038. doi:10.1038/s41467-018-06159-4
6. Li H. Toward better understanding of artifacts in variant calling from high-coverage samples. *Bioinforma Oxf Engl*. 2014;30(20):2843-2851. doi:10.1093/bioinformatics/btu356
7. Zhao H, Sun Z, Wang J, Huang H, Kocher J-P, Wang L. CrossMap: a versatile tool for coordinate conversion between genome assemblies. *Bioinforma Oxf Engl*. 2014;30(7):1006-1007. doi:10.1093/bioinformatics/btt730
8. Karczewski KJ, Francioli LC, Tiao G, et al. *Variation across 141,456 Human Exomes and Genomes Reveals the Spectrum of Loss-of-Function Intolerance across Human Protein-Coding Genes*. *Genomics*; 2019. doi:10.1101/531210
9. Richards S, Aziz N, Bale S, et al. Standards and guidelines for the interpretation of sequence variants: a joint consensus recommendation of the American College of Medical Genetics and Genomics and the Association for Molecular Pathology. *Genet Med Off J Am Coll Med Genet*. 2015;17(5):405-424. doi:10.1038/gim.2015.30
10. Rehm HL, Berg JS, Brooks LD, et al. ClinGen--the Clinical Genome Resource. *N Engl J Med*. 2015;372(23):2235-2242. doi:10.1056/NEJMs1406261
11. Landrum MJ, Lee JM, Benson M, et al. ClinVar: public archive of interpretations of clinically relevant variants. *Nucleic Acids Res*. 2016;44(D1):D862-868. doi:10.1093/nar/gkv1222
12. Cholesterol Treatment Trialists' (CTT) Collaboration. Efficacy and safety of more intensive lowering of LDL cholesterol: a meta-analysis of data from 170 000 participants in 26 randomised trials. *Lancet*. 2010;376(9753):1670-1681. doi:10.1016/S0140-6736(10)61350-5
13. Sudhop T, Lütjohann D, Kodal A, et al. Inhibition of intestinal cholesterol absorption by ezetimibe in humans. *Circulation*. 2002;106(15):1943-1948. doi:10.1161/01.cir.0000034044.95911.dc
14. Cannon CP, Blazing MA, Giugliano RP, et al. Ezetimibe Added to Statin Therapy after Acute Coronary Syndromes. *N Engl J Med*. 2015;372(25):2387-2397. doi:10.1056/NEJMoa1410489
15. Zhao Z, Du S, Shen S, et al. Comparative efficacy and safety of lipid-lowering agents in patients with hypercholesterolemia: A frequentist network meta-analysis. *Medicine (Baltimore)*. 2019;98(6):e14400. doi:10.1097/MD.00000000000014400



16. Lloyd-Jones DM, Morris PB, Ballantyne CM, et al. 2017 Focused Update of the 2016 ACC Expert Consensus Decision Pathway on the Role of Non-Statin Therapies for LDL-Cholesterol Lowering in the Management of Atherosclerotic Cardiovascular Disease Risk: A Report of the American College of Cardiology Task Force on Expert Consensus Decision Pathways. *J Am Coll Cardiol.* 2017;70(14):1785-1822. doi:10.1016/j.jacc.2017.07.745
17. Birjmohun RS, Hutten BA, Kastelein JJP, Stroes ESG. Efficacy and safety of high-density lipoprotein cholesterol-increasing compounds: a meta-analysis of randomized controlled trials. *J Am Coll Cardiol.* 2005;45(2):185-197. doi:10.1016/j.jacc.2004.10.031
18. Price AL, Patterson NJ, Plenge RM, Weinblatt ME, Shadick NA, Reich D. Principal components analysis corrects for stratification in genome-wide association studies. *Nat Genet.* 2006;38(8):904-909. doi:10.1038/ng1847
